# Supplementary material
Source: PubMed Central journal article supplement (PMC5260842)
Supplement: NIHMS835867-supplement-2.pdf [file NIHMS835867-supplement-2.pdf]

*Supplemental Tables for*

**Off-line mixed-mode liquid chromatography coupled with reversed phase high-performance liquid chromatography-high resolution mass spectrometry to improve coverage in lipidomics analysis**

Mónica Narváez-Rivas<sup>a</sup>, Ngoc Vu<sup>b</sup>, Guan-Yuan Chen<sup>a</sup>, Qibin Zhang<sup>a,b\*</sup>

<sup>a</sup> Center for Translational Biomedical Research, University of North Carolina at Greensboro, North Carolina Research Campus, Kannapolis, NC 28081, USA

<sup>b</sup> Department of Chemistry & Biochemistry, University of North Carolina at Greensboro, Greensboro, NC 27412, USA

\* Correspondence to: Qibin Zhang, PhD, UNCG Center for Translational Biomedical Research, North Carolina Research Campus, 500 Laureate Way, Suite 4226, Kannapolis, NC 28081, United States.

Email: q\_zhang2@uncg.edu

Telephone: +1-704-250-5803 Fax: +1-704-250-5809

Table A.1: Fatty acid species identified as fatty acyl methyl esters (FAMES) by the GC method in rat liver and plasma (See Figure A.1). “a” and “b” indicate different isomers. X: identified in the sample; n/a: not detected.

| Peak | FAME                   | RT (min) | Plasma | Liver |
|------|------------------------|----------|--------|-------|
| 1    | C8:0                   | 9.807    | X      | X     |
| 2    | C9:0                   | 10.945   | X      | n/a   |
| 3    | C10:0                  | 12.130   | X      | X     |
| 4    | C11:0                  | 13.315   | n/a    | X     |
| 5    | C12:0                  | 14.508   | X      | X     |
| 6    | C13:0                  | 15.700   | X      | X     |
| 7    | C14:0                  | 16.917   | X      | X     |
| 8    | C14:1                  | 17.832   | n/a    | X     |
| 9    | C15:0                  | 18.158   | X      | X     |
| 10   | C16:0                  | 19.463   | X      | X     |
| 11a  | C16:1 ( <i>trans</i> ) | 19.983   | X      | X     |
| 11   | C16:1 ( <i>cis</i> )   | 20.310   | X      | X     |
| 12   | C16:2                  | 21.388   | X      | X     |
| 13   | C16:3                  | 21.928   | n/a    | X     |
| 14   | C17:0                  | 20.802   | X      | X     |
| 15   | C17:1                  | 21.708   | n/a    | X     |
| 16   | C18:0                  | 22.212   | X      | X     |
| 17a  | C18:1 ( <i>trans</i> ) | 22.753   | X      | X     |
| 17b  | C18:1 ( <i>cis</i> )   | 23.207   | X      | X     |
| 18   | C18:2                  | 23.655   | X      | X     |
| 19   | C18:3                  | 25.238   | X      | X     |
| 20   | C18:4                  | 26.883   | X      | X     |
| 21   | C19:0                  | 23.718   | X      | X     |
| 22   | C20:0                  | 25.158   | X      | X     |
| 23a  | 20:1                   | 26.208   | X      | X     |
| 23b  | C20:1                  | 26.358   | X      | X     |
| 24   | C20:2                  | 27.395   | X      | X     |
| 25   | C20:3                  | 28.370   | X      | X     |
| 26a  | C20:4                  | 29.095   | X      | X     |
| 26b  | C20:4                  | 29.695   | X      | X     |
| 27a  | C20:5                  | 30.735   | X      | X     |
| 27b  | C20:5                  | 34.098   | X      | X     |
| 28   | C21:0                  | 26.668   | X      | n/a   |
| 29   | C22:0                  | 28.215   | X      | X     |
| 30   | C22:4                  | 32.210   | X      | X     |
| 31   | C22:5                  | 32.808   | X      | X     |
| 32   | C22:6                  | 34.725   | X      | X     |
| 33   | C23:0                  | 29.738   | X      | n/a   |
| 34   | C24:0                  | 31.287   | X      | X     |
| 35   | C24:1                  | 32.225   | X      | n/a   |
| 36   | C25:0                  | 32.622   | X      | n/a   |

Table A.2: Lipids identified in rat liver by off-line two-dimensional high-performance liquid chromatography-high resolution mass spectrometry.

| Detection method | Lipid Molecule    | Class | Fatty acids (FA) | FA Group | Calc Mass | Formula       | Base Rt | Main Ion |
|------------------|-------------------|-------|------------------|----------|-----------|---------------|---------|----------|
| *                | Cer(d18:0/16:0)   | Cer   | d18:0/16:0       | d34:0    | 539.5277  | C34 H69 O3 N1 | 12.639  | +H       |
| X                | Cer(d18:0/16:0)   | Cer   | d18:0/16:0       | d34:0    | 539.5277  | C34 H69 O3 N1 | 12.946  | +H       |
| X                | Cer(d18:0/18:0)   | Cer   | d18:0/18:0       | d36:0    | 567.559   | C36 H73 O3 N1 | 14.258  | +H       |
| *                | Cer(d18:0/16:0)   | Cer   | d18:0/16:0       | d34:0    | 539.5277  | C34 H69 O3 N1 | 12.779  | +H       |
| *                | Cer(d18:0/22:0)   | Cer   | d18:0/22:0       | d40:0    | 623.6216  | C40 H81 O3 N1 | 16.042  | +H       |
| *                | Cer(d18:0/22:0)   | Cer   | d18:0/22:0       | d40:0    | 623.6216  | C40 H81 O3 N1 | 16.97   | +H       |
| *                | Cer(d18:0/24:0)   | Cer   | d18:0/24:0       | d42:0    | 651.6529  | C42 H85 O3 N1 | 17.13   | +H       |
| X                | Cer(d18:0/24:0)   | Cer   | d18:0/24:0       | d42:0    | 651.6529  | C42 H85 O3 N1 | 17.91   | +H       |
| *                | Cer(d18:1/16:0)   | Cer   | d18:1/16:0       | d34:1    | 537.5121  | C34 H67 O3 N1 | 11.808  | -H       |
| X                | Cer(d18:1/16:0)   | Cer   | d18:1/16:0       | d34:1    | 537.5121  | C34 H67 O3 N1 | 12.07   | +H       |
| *                | Cer(d18:1/16:0+O) | Cer   | d18:1/16:0+O     | d34:1+O  | 553.507   | C34 H67 O4 N1 | 11.387  | -H       |
| *                | Cer(d18:1/16:1)   | Cer   | d18:1/16:1       | d34:2    | 535.4964  | C34 H65 O3 N1 | 9.655   | +H       |
| *                | Cer(d18:1/16:1)   | Cer   | d18:1/16:1       | d34:2    | 535.4964  | C34 H65 O3 N1 | 11.394  | +H       |
| X                | Cer(d18:1/18:0)   | Cer   | d18:1/18:0       | d36:1    | 565.5434  | C36 H71 O3 N1 | 13.713  | +H       |
| *                | Cer(d18:1/18:1)   | Cer   | d18:1/18:1       | d36:2    | 563.5277  | C36 H69 O3 N1 | 12.202  | -H       |
| X                | Cer(d18:1/20:0)   | Cer   | d18:1/20:0       | d38:1    | 593.5747  | C38 H75 O3 N1 | 15.273  | +H       |
| X                | Cer(d18:1/22:0)   | Cer   | d18:1/22:0       | d40:1    | 621.606   | C40 H79 O3 N1 | 16.616  | -H       |
| X                | Cer(d18:1/24:0)   | Cer   | d18:1/24:0       | d42:1    | 649.6373  | C42 H83 O3 N1 | 16.824  | +H       |
| X                | Cer(d18:1/24:0)   | Cer   | d18:1/24:0       | d42:1    | 649.6373  | C42 H83 O3 N1 | 17.441  | +H       |
| *                | Cer(d18:1/24:0)   | Cer   | d18:1/24:0       | d42:1    | 649.6373  | C42 H83 O3 N1 | 17.619  | -H       |
| *                | Cer(d18:2/16:0)   | Cer   | d18:2/16:0       | d34:2    | 535.4964  | C34 H65 O3 N1 | 10.695  | -H       |
| *                | Cer(d18:2/16:1)   | Cer   | d18:2/16:1       | d34:3    | 533.4808  | C34 H63 O3 N1 | 10.023  | +H       |
| *                | Cer(d18:2/20:0)   | Cer   | d18:2/20:0       | d38:2    | 591.559   | C38 H73 O3 N1 | 14.008  | -H       |
| *                | Cer(d18:2/22:0)   | Cer   | d18:2/22:0       | d40:2    | 619.5903  | C40 H77 O3 N1 | 15.584  | +H       |
| *                | Cer(d18:2/24:0)   | Cer   | d18:2/24:0       | d42:2    | 647.6216  | C42 H81 O3 N1 | 16.635  | +H       |
| *                | Cer(d18:2/24:0)   | Cer   | d18:2/24:0       | d42:2    | 647.6216  | C42 H81 O3 N1 | 16.831  | -H       |

|   |                         |     |                     |       |          |                 |        |      |
|---|-------------------------|-----|---------------------|-------|----------|-----------------|--------|------|
| * | Cer(d18:2/24:0)         | Cer | d18:2/24:0          | d42:2 | 647.6216 | C42 H81 O3 N1   | 16.969 | +H   |
| * | CE(18:2)                | CE  | 18:2                | 18:2  | 648.5845 | C45 H76 O2      | 20.82  | +NH4 |
| * | CE(20:4)                | CE  | 20:4                | 20:4  | 672.5845 | C47 H76 O2      | 20.508 | +NH4 |
| * | CL(16:2,22:6,18:2,18:2) | CL  | 16:2/22:6/18:2/18:2 | 74:12 | 1468.941 | C83 H138 O17 P2 | 18.096 | -H   |
| X | CL(18:1,16:0,16:0,18:1) | CL  | 18:1/16:0/16:0/18:1 | 68:2  | 1405.004 | C77 H146 O17 P2 | 19.681 | -H   |
| * | CL(18:2,16:0,16:0,18:1) | CL  | 18:2/16:0/16:0/18:1 | 68:3  | 1402.988 | C77 H144 O17 P2 | 19.406 | -H   |
| X | CL(18:2,12:0,18:2,18:2) | CL  | 18:2/12:0/18:2/18:2 | 66:6  | 1368.91  | C75 H134 O17 P2 | 17.831 | -H   |
| X | CL(18:2,14:0,20:4,18:2) | CL  | 18:2/14:0/20:4/18:2 | 70:8  | 1420.941 | C79 H138 O17 P2 | 18.7   | -H   |
| X | CL(18:2,15:0,18:2,18:1) | CL  | 18:2/15:0/18:2/18:1 | 69:5  | 1412.972 | C78 H142 O17 P2 | 18.922 | -H   |
| * | CL(18:2,16:0,16:0,20:1) | CL  | 18:2/16:0/16:0/20:1 | 70:3  | 1431.019 | C79 H148 O17 P2 | 11.408 | -H   |
| X | CL(18:2,16:0,18:1,16:0) | CL  | 18:2/16:0/18:1/16:0 | 68:3  | 1402.988 | C77 H144 O17 P2 | 19.446 | -H   |
| X | CL(18:2,16:1,16:1,18:2) | CL  | 18:2/16:1/16:1/18:2 | 68:6  | 1396.941 | C77 H138 O17 P2 | 18.323 | -H   |
| X | CL(18:2,16:1,18:1,18:2) | CL  | 18:2/16:1/18:1/18:2 | 70:6  | 1424.972 | C79 H142 O17 P2 | 18.765 | -H   |
| * | CL(18:2,16:1,18:2,18:2) | CL  | 18:2/16:1/18:2/18:2 | 70:7  | 1422.957 | C79 H140 O17 P2 | 18.346 | -H   |
| X | CL(18:2,18:0,18:0,20:1) | CL  | 18:2/18:0/18:0/20:1 | 74:3  | 1487.082 | C83 H156 O17 P2 | 13.019 | -H   |
| X | CL(18:2,18:0,18:0,22:4) | CL  | 18:2/18:0/18:0/22:4 | 76:6  | 1509.066 | C85 H154 O17 P2 | 12.996 | -H   |
| X | CL(18:2,18:1,18:1,18:2) | CL  | 18:2/18:1/18:1/18:2 | 72:6  | 1453.004 | C81 H146 O17 P2 | 19.103 | -H   |
| X | CL(18:2,18:1,18:2,18:2) | CL  | 18:2/18:1/18:2/18:2 | 72:7  | 1450.988 | C81 H144 O17 P2 | 18.774 | -H   |
| * | CL(18:2,18:1,20:4,18:2) | CL  | 18:2/18:1/20:4/18:2 | 74:9  | 1474.988 | C83 H144 O17 P2 | 18.698 | -H   |
| X | CL(18:2,18:2,16:0,18:1) | CL  | 18:2/18:2/16:0/18:1 | 70:5  | 1426.988 | C79 H144 O17 P2 | 19.125 | -H   |
| X | CL(18:2,18:2,18:2,18:2) | CL  | 18:2/18:2/18:2/18:2 | 72:8  | 1448.972 | C81 H142 O17 P2 | 18.436 | -H   |
| X | CL(18:2,18:2,18:2,18:2) | CL  | 18:2/18:2/18:2/18:2 | 72:8  | 1448.972 | C81 H142 O17 P2 | 19.112 | -H   |
| X | CL(18:2,18:2,20:3,18:2) | CL  | 18:2/18:2/20:3/18:2 | 74:9  | 1474.988 | C83 H144 O17 P2 | 18.551 | -H   |
| * | CL(18:2,18:2,20:4,18:2) | CL  | 18:2/18:2/20:4/18:2 | 74:10 | 1472.972 | C83 H142 O17 P2 | 18.347 | -H   |
| X | CL(18:2,18:2,22:5,18:2) | CL  | 18:2/18:2/22:5/18:2 | 76:11 | 1498.988 | C85 H144 O17 P2 | 18.871 | -H   |
| X | CL(18:2,18:2,22:6,18:2) | CL  | 18:2/18:2/22:6/18:2 | 76:12 | 1496.972 | C85 H142 O17 P2 | 18.214 | -H   |
| * | CL(18:2,20:3,18:2,20:4) | CL  | 18:2/20:3/18:2/20:4 | 76:11 | 1498.988 | C85 H144 O17 P2 | 18.569 | -H   |
| X | CL(18:2,20:4,18:1,18:2) | CL  | 18:2/20:4/18:1/18:2 | 74:9  | 1474.988 | C83 H144 O17 P2 | 19.103 | -H   |
| * | CL(18:2,20:4,18:2,20:3) | CL  | 18:2/20:4/18:2/20:3 | 76:11 | 1498.988 | C85 H144 O17 P2 | 18.35  | -H   |
| * | CL(18:2,22:6,16:1,22:6) | CL  | 18:2/22:6/16:1/22:6 | 78:15 | 1518.957 | C87 H140 O17 P2 | 18.226 | -H   |

|   |                         |    |                     |       |          |                 |        |      |
|---|-------------------------|----|---------------------|-------|----------|-----------------|--------|------|
| X | CL(18:3,16:1,18:2,18:2) | CL | 18:3/16:1/18:2/18:2 | 70:8  | 1420.941 | C79 H138 O17 P2 | 18.035 | -H   |
| X | CL(18:3,18:2,16:1,22:6) | CL | 18:3/18:2/16:1/22:6 | 74:12 | 1468.941 | C83 H138 O17 P2 | 18.122 | -H   |
| X | CL(18:3,18:2,18:2,18:2) | CL | 18:3/18:2/18:2/18:2 | 72:9  | 1446.957 | C81 H140 O17 P2 | 18.1   | -H   |
| * | CL(18:3,20:3,18:2,18:2) | CL | 18:3/20:3/18:2/18:2 | 74:10 | 1472.972 | C83 H142 O17 P2 | 18.22  | -H   |
| * | CL(20:2,16:0,20:4,20:4) | CL | 20:2/16:0/20:4/20:4 | 76:10 | 1501.004 | C85 H146 O17 P2 | 11.192 | -H   |
| * | CL(20:2,16:0,22:6,22:6) | CL | 20:2/16:0/22:6/22:6 | 80:14 | 1549.004 | C89 H146 O17 P2 | 10.82  | -H   |
| * | CL(20:2,18:2,18:1,20:3) | CL | 20:2/18:2/18:1/20:3 | 76:8  | 1505.035 | C85 H150 O17 P2 | 19.236 | -H   |
| X | CL(20:2,18:2,18:2,18:1) | CL | 20:2/18:2/18:2/18:1 | 74:7  | 1479.019 | C83 H148 O17 P2 | 19.141 | -H   |
| X | CL(20:2,18:2,18:2,18:2) | CL | 20:2/18:2/18:2/18:2 | 74:8  | 1477.004 | C83 H146 O17 P2 | 18.87  | -H   |
| * | CL(20:2,18:2,18:2,20:3) | CL | 20:2/18:2/18:2/20:3 | 76:9  | 1503.019 | C85 H148 O17 P2 | 18.95  | -H   |
| X | CL(20:4,16:0,20:0,20:4) | CL | 20:4/16:0/20:0/20:4 | 76:8  | 1505.035 | C85 H150 O17 P2 | 11.236 | -H   |
| * | CL(20:4,18:0,20:4,22:0) | CL | 20:4/18:0/20:4/22:0 | 80:8  | 1561.097 | C89 H158 O17 P2 | 12.857 | -H   |
| X | CL(20:5,18:2,14:0,18:2) | CL | 20:5/18:2/14:0/18:2 | 70:9  | 1418.925 | C79 H136 O17 P2 | 18.301 | -H   |
| X | CL(20:5,18:2,16:1,18:2) | CL | 20:5/18:2/16:1/18:2 | 72:10 | 1444.941 | C81 H138 O17 P2 | 18.35  | -H   |
| X | CL(20:5,18:2,18:2,18:2) | CL | 20:5/18:2/18:2/18:2 | 74:11 | 1470.957 | C83 H140 O17 P2 | 18.012 | -H   |
| X | CL(20:5,18:2,18:2,18:2) | CL | 20:5/18:2/18:2/18:2 | 74:11 | 1470.957 | C83 H140 O17 P2 | 18.444 | -H   |
| * | CL(20:5,18:2,18:2,20:4) | CL | 20:5/18:2/18:2/20:4 | 76:13 | 1494.957 | C85 H140 O17 P2 | 18.387 | -H   |
| * | CL(20:5,18:2,22:6,18:2) | CL | 20:5/18:2/22:6/18:2 | 78:15 | 1518.957 | C87 H140 O17 P2 | 18.268 | -H   |
| * | CL(22:5,16:0,18:1,22:5) | CL | 22:5/16:0/18:1/22:5 | 78:11 | 1527.019 | C87 H148 O17 P2 | 11.235 | -H   |
| * | CL(22:5,16:0,20:0,20:4) | CL | 22:5/16:0/20:0/20:4 | 78:9  | 1531.051 | C87 H152 O17 P2 | 11.286 | -H   |
| * | CL(22:5,18:1,18:1,22:5) | CL | 22:5/18:1/18:1/22:5 | 80:12 | 1553.035 | C89 H150 O17 P2 | 11.283 | -H   |
| * | CL(22:6,16:0,20:0,22:6) | CL | 22:6/16:0/20:0/22:6 | 80:12 | 1553.035 | C89 H150 O17 P2 | 10.872 | -H   |
| * | CL(22:6,16:0,20:1,20:4) | CL | 22:6/16:0/20:1/20:4 | 78:11 | 1527.019 | C87 H148 O17 P2 | 10.822 | -H   |
| * | CL(22:6,18:0,20:0,22:5) | CL | 22:6/18:0/20:0/22:5 | 82:11 | 1583.082 | C91 H156 O17 P2 | 12.421 | -H   |
| * | DG(16:0/0:0/18:2)       | DG | 16:0/0:0/18:2       | 34:1  | 594.5223 | C37 H70 O5      | 14.921 | +NH4 |
| * | DG(16:0/0:0/20:4)       | DG | 16:0/0:0/20:4       | 34:2  | 592.5067 | C37 H68 O5      | 13.768 | +NH4 |
| * | DG(16:0/18:1/0:0)       | DG | 16:0/18:1/0:0       | 34:2  | 592.5067 | C37 H68 O5      | 13.762 | +NH4 |
| * | DG(16:0/18:2/0:0)       | DG | 16:0/18:2/0:0       | 34:3  | 590.491  | C37 H66 O5      | 9.608  | +H   |
| * | DG(16:0/18:3/0:0)       | DG | 16:0/18:3/0:0       | 34:3  | 590.491  | C37 H66 O5      | 10.652 | +H   |
| * | DG(16:0/18:3/0:0)       | DG | 16:0/18:3/0:0       | 34:3  | 590.491  | C37 H66 O5      | 12.72  | +H   |

|   |                   |    |               |      |          |            |        |      |
|---|-------------------|----|---------------|------|----------|------------|--------|------|
| * | DG(16:0/18:3/0:0) | DG | 16:0/18:3/0:0 | 36:4 | 616.5067 | C39 H68 O5 | 13.395 | +H   |
| * | DG(16:0/20:4/0:0) | DG | 16:0/20:4/0:0 | 36:4 | 616.5067 | C39 H68 O5 | 13.373 | +H   |
| * | DG(16:0/22:5/0:0) | DG | 16:0/22:5/0:0 | 38:5 | 642.5223 | C41 H70 O5 | 13.511 | +H   |
| * | DG(16:0/22:6/0:0) | DG | 16:0/22:6/0:0 | 38:6 | 640.5067 | C41 H68 O5 | 12.936 | +NH4 |
| * | DG(16:1/18:2/0:0) | DG | 16:1/18:2/0:0 | 34:3 | 590.491  | C37 H66 O5 | 12.308 | +NH4 |
| * | DG(16:1/18:3/0:0) | DG | 16:1/18:3/0:0 | 34:4 | 588.4754 | C37 H64 O5 | 8.236  | +H   |
| * | DG(18:0/0:0/20:4) | DG | 18:0/0:0/20:4 | 36:2 | 620.538  | C39 H72 O5 | 15.293 | +NH4 |
| * | DG(18:0/18:2/0:0) | DG | 18:0/18:2/0:0 | 36:3 | 618.5223 | C39 H70 O5 | 11.157 | +H   |
| * | DG(18:0/18:3/0:0) | DG | 18:0/18:3/0:0 | 38:3 | 646.5536 | C41 H74 O5 | 15.62  | +H   |
| * | DG(18:0/20:3/0:0) | DG | 18:0/20:3/0:0 | 38:4 | 644.538  | C41 H72 O5 | 14.981 | +H   |
| * | DG(18:0/20:4/0:0) | DG | 18:0/20:4/0:0 | 38:4 | 644.538  | C41 H72 O5 | 14.94  | +NH4 |
| * | DG(18:1/0:0/18:2) | DG | 18:1/0:0/18:2 | 36:2 | 620.538  | C39 H72 O5 | 14.987 | +NH4 |
| * | DG(18:1/18:1/0:0) | DG | 18:1/18:1/0:0 | 36:3 | 618.5223 | C39 H70 O5 | 13.848 | +NH4 |
| * | DG(18:1/18:2/0:0) | DG | 18:1/18:2/0:0 | 36:3 | 618.5223 | C39 H70 O5 | 13.815 | +NH4 |
| * | DG(18:1/18:3/0:0) | DG | 18:1/18:3/0:0 | 36:4 | 616.5067 | C39 H68 O5 | 9.706  | +H   |
| * | DG(18:1/18:3/0:0) | DG | 18:1/18:3/0:0 | 36:4 | 616.5067 | C39 H68 O5 | 9.86   | +H   |
| * | DG(18:1/18:3/0:0) | DG | 18:1/18:3/0:0 | 36:4 | 616.5067 | C39 H68 O5 | 12.793 | +H   |
| * | DG(18:1/20:4/0:0) | DG | 18:1/20:4/0:0 | 38:5 | 642.5223 | C41 H70 O5 | 13.404 | +H   |
| * | DG(18:2/0:0/18:2) | DG | 18:2/0:0/18:2 | 36:4 | 616.5067 | C39 H68 O5 | 12.63  | +NH4 |
| * | DG(18:2/18:2/0:0) | DG | 18:2/18:2/0:0 | 36:4 | 616.5067 | C39 H68 O5 | 12.604 | +NH4 |
| * | DG(18:2/20:4/0:0) | DG | 18:2/20:4/0:0 | 38:6 | 640.5067 | C41 H68 O5 | 12.235 | +NH4 |
| * | DG(18:2/22:6/0:0) | DG | 18:2/22:6/0:0 | 40:8 | 664.5067 | C43 H68 O5 | 11.819 | +NH4 |
| * | DG(18:3/18:2/0:0) | DG | 18:3/18:2/0:0 | 36:5 | 614.491  | C39 H66 O5 | 8.618  | +H   |
| * | DG(18:3/18:2/0:0) | DG | 18:3/18:2/0:0 | 36:5 | 614.491  | C39 H66 O5 | 11.556 | +H   |
| * | DG(18:3/18:3/0:0) | DG | 18:3/18:3/0:0 | 36:6 | 612.4754 | C39 H64 O5 | 10.532 | +H   |
| * | DG(18:3/20:4/0:0) | DG | 18:3/20:4/0:0 | 38:7 | 638.491  | C41 H66 O5 | 11.209 | +H   |
| * | DG(18:4/16:0/0:0) | DG | 18:4/16:0/0:0 | 34:4 | 588.4754 | C37 H64 O5 | 8.112  | +H   |
| * | DG(18:4/16:0/0:0) | DG | 18:4/16:0/0:0 | 34:4 | 588.4754 | C37 H64 O5 | 9.494  | +H   |
| * | DG(18:4/16:0/0:0) | DG | 18:4/16:0/0:0 | 34:4 | 588.4754 | C37 H64 O5 | 9.751  | +H   |
| * | DG(18:4/16:0/0:0) | DG | 18:4/16:0/0:0 | 34:4 | 588.4754 | C37 H64 O5 | 9.979  | +H   |

|   |                   |     |               |       |          |                  |        |    |
|---|-------------------|-----|---------------|-------|----------|------------------|--------|----|
| * | DG(18:4/18:1/0:0) | DG  | 18:4/18:1/0:0 | 36:5  | 614.491  | C39 H66 O5       | 8.188  | +H |
| * | DG(18:4/18:2/0:0) | DG  | 18:4/18:2/0:0 | 36:6  | 612.4754 | C39 H64 O5       | 8.513  | +H |
| * | DG(20:3/18:2/0:0) | DG  | 20:3/18:2/0:0 | 38:5  | 642.5223 | C41 H70 O5       | 12.981 | +H |
| * | DG(22:4/18:2/0:0) | DG  | 22:4/18:2/0:0 | 40:6  | 668.538  | C43 H72 O5       | 13.376 | +H |
| * | DG(22:5/18:2/0:0) | DG  | 22:5/18:2/0:0 | 40:7  | 666.5223 | C43 H70 O5       | 12.369 | +H |
| * | LysoPC(0:0/14:0)  | LPC | 14:0          | 14:0  | 467.3012 | C22 H46 O7 N1 P1 | 1.542  | +H |
| X | LysoPC(14:0/0:0)  | LPC | 14:0          | 14:0  | 467.3012 | C22 H46 O7 N1 P1 | 1.662  | +H |
| * | LysoPC(0:0/15:0)  | LPC | 15:0          | 15:0  | 481.3168 | C23 H48 O7 N1 P1 | 1.852  | +H |
| X | LysoPC(15:0/0:0)  | LPC | 15:0          | 15:0  | 481.3168 | C23 H48 O7 N1 P1 | 2.002  | +H |
| X | LysoPC(0:0/16:0)  | LPC | 16:0          | 16:0  | 495.3325 | C24 H50 O7 N1 P1 | 1.950  | +H |
| X | LysoPC(16:0/0:0)  | LPC | 16:0          | 16:0  | 495.3325 | C24 H50 O7 N1 P1 | 2.46   | +H |
| X | LysoPC(16:0e)     | LPC | 16:0e         | 16:0e | 481.3532 | C24 H52 O6 N1 P1 | 2.952  | +H |
| X | LysoPC(0:0/16:1)  | LPC | 16:1          | 16:1  | 493.3168 | C24 H48 O7 N1 P1 | 1.668  | +H |
| * | LysoPC(16:1/0:0)  | LPC | 16:1          | 16:1  | 493.3168 | C24 H48 O7 N1 P1 | 1.787  | +H |
| * | LysoPC(16:1p)     | LPC | 16:1p         | 16:1p | 477.3219 | C24 H48 O6 N1 P1 | 2.259  | +H |
| X | LysoPC(16:1)      | LPC | 16:1p         | 16:1p | 477.3219 | C24 H48 O6 N1 P1 | 2.435  | +H |
| * | LysoPC(16:2/0:0)  | LPC | 16:2          | 16:2  | 491.3012 | C24 H46 O7 N1 P1 | 1.453  | +H |
| X | LysoPC(0:0/17:0)  | LPC | 17:0          | 17:0  | 509.3481 | C25 H52 O7 N1 P1 | 2.827  | +H |
| * | LysoPC(17:0/0:0)  | LPC | 17:0          | 17:0  | 509.3481 | C25 H52 O7 N1 P1 | 3.057  | +H |
| X | LysoPC(0:0/18:0)  | LPC | 18:0          | 18:0  | 523.3638 | C26 H54 O7 N1 P1 | 3.477  | +H |
| X | LysoPC(18:0/0:0)  | LPC | 18:0          | 18:0  | 523.3638 | C26 H54 O7 N1 P1 | 3.802  | +H |
| X | LysoPC(18:0e)     | LPC | 18:0e         | 18:0e | 509.3845 | C26 H56 O6 N1 P1 | 4.591  | +H |
| X | LysoPC(18:0p)     | LPC | 18:0p         | 18:0p | 507.3689 | C26 H54 O6 N1 P1 | 3.147  | +H |
| X | LysoPC(0:0/18:1)  | LPC | 18:1          | 18:1  | 521.3481 | C26 H52 O7 N1 P1 | 2.443  | +H |
| X | LysoPC(18:1/0:0)  | LPC | 18:1          | 18:1  | 521.3481 | C26 H52 O7 N1 P1 | 2.629  | +H |
| X | LysoPC(18:1p)     | LPC | 18:1p         | 18:1p | 505.3532 | C26 H52 O6 N1 P1 | 3.805  | +H |
| X | LysoPC(0:0/18:2)  | LPC | 18:2          | 18:2  | 519.3325 | C26 H50 O7 N1 P1 | 1.855  | +H |
| X | LysoPC(18:2/0:0)  | LPC | 18:2          | 18:2  | 519.3325 | C26 H50 O7 N1 P1 | 1.99   | +H |
| X | LysoPC(18:3/0:0)  | LPC | 18:3          | 18:3  | 517.3168 | C26 H48 O7 N1 P1 | 1.6    | +H |
| * | LysoPC(0:0/18:3)  | LPC | 18:3          | 18:3  | 517.3168 | C26 H48 O7 N1 P1 | 2.267  | +H |

|   |                  |     |      |      |          |                  |       |       |
|---|------------------|-----|------|------|----------|------------------|-------|-------|
| * | LysoPC(18:3/0:0) | LPC | 18:3 | 18:3 | 517.3168 | C26 H48 O7 N1 P1 | 2.469 | +H    |
| X | LysoPC(0:0/19:0) | LPC | 19:0 | 19:0 | 537.3794 | C27 H56 O7 N1 P1 | 4.334 | +H    |
| X | LysoPC(19:0/0:0) | LPC | 19:0 | 19:0 | 537.3794 | C27 H56 O7 N1 P1 | 4.714 | +H    |
| X | LysoPC(0:0/20:0) | LPC | 20:0 | 20:0 | 551.3951 | C28 H58 O7 N1 P1 | 5.427 | +H    |
| * | LysoPC(20:0/0:0) | LPC | 20:0 | 20:0 | 551.3951 | C28 H58 O7 N1 P1 | 5.733 | +H    |
| X | LysoPC(20:1/0:0) | LPC | 20:1 | 20:1 | 549.3794 | C28 H56 O7 N1 P1 | 3.914 | +H    |
| X | LysoPC(0:0/20:2) | LPC | 20:2 | 20:2 | 547.3638 | C28 H54 O7 N1 P1 | 2.877 | +H    |
| X | LysoPC(0:0/20:3) | LPC | 20:3 | 20:3 | 545.3481 | C28 H52 O7 N1 P1 | 2.241 | +HCOO |
| * | LysoPC(0:0/20:3) | LPC | 20:3 | 20:3 | 545.3481 | C28 H52 O7 N1 P1 | 3.818 | +H    |
| X | LysoPC(0:0/20:4) | LPC | 20:4 | 20:4 | 543.3325 | C28 H50 O7 N1 P1 | 1.798 | +H    |
| * | LysoPC(20:4/0:0) | LPC | 20:4 | 20:4 | 543.3325 | C28 H50 O7 N1 P1 | 1.917 | +H    |
| * | LysoPC(20:4/0:0) | LPC | 20:4 | 20:4 | 543.3325 | C28 H50 O7 N1 P1 | 2.605 | +H    |
| * | LysoPC(0:0/20:5) | LPC | 20:5 | 20:5 | 541.3168 | C28 H48 O7 N1 P1 | 1.852 | +H    |
| * | LysoPC(20:5/0:0) | LPC | 20:5 | 20:5 | 541.3168 | C28 H48 O7 N1 P1 | 1.988 | +H    |
| X | LysoPC(22:0/0:0) | LPC | 22:0 | 22:0 | 579.4264 | C30 H62 O7 N1 P1 | 7.487 | +H    |
| X | LysoPC(0:0/22:6) | LPC | 22:6 | 22:6 | 567.3325 | C30 H50 O7 N1 P1 | 1.714 | +H    |
| * | LysoPE(16:0)     | LPE | 16:0 | 16:0 | 453.2855 | C21 H44 O7 N1 P1 | 2.386 | +H    |
| * | LysoPE(16:0)     | LPE | 16:0 | 16:0 | 453.2855 | C21 H44 O7 N1 P1 | 2.584 | -H    |
| * | LysoPE(18:0)     | LPE | 18:0 | 18:0 | 481.3168 | C23 H48 O7 N1 P1 | 3.687 | -H    |
| * | LysoPE(18:0)     | LPE | 18:0 | 18:0 | 481.3168 | C23 H48 O7 N1 P1 | 4.004 | +H    |
| * | LysoPE(18:1)     | LPE | 18:1 | 18:1 | 479.3012 | C23 H46 O7 N1 P1 | 2.756 | -H    |
| X | LysoPE(18:2)     | LPE | 18:2 | 18:2 | 477.2855 | C23 H44 O7 N1 P1 | 2.075 | +H    |
| X | LPE(20:4)        | LPE | 20:4 | 20:4 | 501.2855 | C25 H44 O7 N1 P1 | 1.899 | -H    |
| X | LPE(22:5)        | LPE | 22:5 | 22:5 | 527.3012 | C27 H46 O7 N1 P1 | 1.998 | +H    |
| X | LPE(22:6)        | LPE | 22:6 | 22:6 | 525.2855 | C27 H44 O7 N1 P1 | 1.800 | +H    |
| * | LysoPG(16:0)     | LPG | 16:0 | 16:0 | 484.2801 | C22 H45 O9 N0 P1 | 2.314 | -H    |
| * | LysoPG(18:1)     | LPG | 18:1 | 18:1 | 510.2958 | C24 H47 O9 N0 P1 | 2.465 | -H    |
| X | LysoPG(18:2)     | LPG | 18:2 | 18:2 | 508.2801 | C24 H45 O9 N0 P1 | 1.868 | -H    |
| * | LysoPG(20:4)     | LPG | 20:4 | 20:4 | 532.2801 | C26 H45 O9 N0 P1 | 1.817 | -H    |
| * | LysoPG(22:6)     | LPG | 22:6 | 22:6 | 556.2801 | C28 H45 O9 N0 P1 | 1.713 | -H    |



|   |               |     |           |      |          |                   |        |    |
|---|---------------|-----|-----------|------|----------|-------------------|--------|----|
| * | LysoPI(16:0)  | LPI | 16:0      | 16:0 | 572.2962 | C25 H49 O12 N0 P1 | 2.112  | -H |
| * | LysoPI(18:0)  | LPI | 18:0      | 18:0 | 600.3275 | C27 H53 O12 N0 P1 | 2.961  | -H |
| X | LysoPI(18:0)  | LPI | 18:0      | 18:0 | 600.3275 | C27 H53 O12 N0 P1 | 3.229  | -H |
| * | LysoPI(18:2)  | LPI | 18:2      | 18:2 | 596.2962 | C27 H49 O12 N0 P1 | 1.734  | -H |
| * | LysoPI(20:3)  | LPI | 20:3      | 20:3 | 622.3118 | C29 H51 O12 N0 P1 | 1.955  | -H |
| * | LysoPI(20:4)  | LPI | 20:4      | 20:4 | 620.2962 | C29 H49 O12 N0 P1 | 1.565  | -H |
| X | LysoPI(20:4)  | LPI | 20:4      | 20:4 | 620.2962 | C29 H49 O12 N0 P1 | 1.693  | -H |
| * | PA(14:0,18:2) | PA  | 14:0/18:2 | 32:2 | 644.4417 | C35 H65 O8 N0 P1  | 9.612  | -H |
| X | PA(16:0,18:1) | PA  | 16:0/18:1 | 34:1 | 674.4887 | C37 H71 O8 N0 P1  | 12.323 | -H |
| * | PA(16:0,18:1) | PA  | 16:0/18:1 | 34:1 | 674.4887 | C37 H71 O8 N0 P1  | 12.664 | -H |
| X | PA(16:0,18:2) | PA  | 16:0/18:2 | 34:2 | 672.473  | C37 H69 O8 N0 P1  | 11.134 | -H |
| X | PA(16:0,20:4) | PA  | 16:0/20:4 | 36:4 | 696.473  | C39 H69 O8 N0 P1  | 10.9   | -H |
| * | PA(16:0,20:4) | PA  | 16:0/20:4 | 36:4 | 696.473  | C39 H69 O8 N0 P1  | 11.054 | -H |
| * | PA(16:0,22:6) | PA  | 16:0/22:6 | 38:6 | 720.473  | C41 H69 O8 N0 P1  | 10.547 | -H |
| * | PA(16:1,18:2) | PA  | 16:1/18:2 | 34:3 | 670.4574 | C37 H67 O8 N0 P1  | 9.882  | -H |
| * | PA(16:2,18:2) | PA  | 16:2/18:2 | 34:4 | 668.4417 | C37 H65 O8 N0 P1  | 8.821  | -H |
| * | PA(18:0,18:1) | PA  | 18:0/18:1 | 36:1 | 702.52   | C39 H75 O8 N0 P1  | 13.96  | -H |
| * | PA(18:0,18:2) | PA  | 18:0/18:2 | 36:2 | 700.5043 | C39 H73 O8 N0 P1  | 12.747 | -H |
| X | PA(18:0,20:4) | PA  | 18:0/20:4 | 38:4 | 724.5043 | C41 H73 O8 N0 P1  | 11.753 | -H |
| * | PA(18:1,18:1) | PA  | 18:1/18:1 | 36:2 | 700.5043 | C39 H73 O8 N0 P1  | 12.485 | -H |
| * | PA(18:1,18:2) | PA  | 18:1/18:2 | 36:3 | 698.4887 | C39 H71 O8 N0 P1  | 11.246 | -H |
| * | PA(18:1,20:4) | PA  | 18:1/20:4 | 38:5 | 722.4887 | C41 H71 O8 N0 P1  | 11.037 | -H |
| X | PA(18:2,18:2) | PA  | 18:2/18:2 | 36:4 | 696.473  | C39 H69 O8 N0 P1  | 10.08  | -H |
| * | PA(18:2,18:2) | PA  | 18:2/18:2 | 36:4 | 696.473  | C39 H69 O8 N0 P1  | 10.492 | -H |
| * | PA(18:2,20:4) | PA  | 18:2/20:4 | 38:6 | 720.473  | C41 H69 O8 N0 P1  | 9.855  | -H |
| * | PA(18:3,18:2) | PA  | 18:3/18:2 | 36:5 | 694.4574 | C39 H67 O8 N0 P1  | 9.121  | -H |
| X | PC(14:0/18:2) | PC  | 14:0/18:2 | 32:2 | 729.5309 | C40 H76 O8 N1 P1  | 9.456  | +H |
| X | PC(14:0/20:4) | PC  | 14:0/20:4 | 34:4 | 753.5309 | C42 H76 O8 N1 P1  | 9.263  | +H |
| * | PC(14:0/22:6) | PC  | 14:0/22:6 | 36:6 | 777.5309 | C44 H76 O8 N1 P1  | 8.911  | +H |
| * | PC(15:0/16:0) | PC  | 15:0/16:0 | 31:0 | 719.5465 | C39 H78 O8 N1 P1  | 11.244 | +H |

|   |                |    |            |       |          |                  |        |       |
|---|----------------|----|------------|-------|----------|------------------|--------|-------|
| * | PC(15:0/18:1)  | PC | 15:0/18:1  | 33:1  | 745.5622 | C41 H80 O8 N1 P1 | 11.401 | +H    |
| X | PC(15:0/18:2)  | PC | 15:0/18:2  | 33:2  | 743.5465 | C41 H78 O8 N1 P1 | 10.225 | +H    |
| X | PC(15:0/20:4)  | PC | 15:0/20:4  | 35:4  | 767.5465 | C43 H78 O8 N1 P1 | 10.01  | +H    |
| * | PC(15:0/22:5)  | PC | 15:0/22:5  | 37:5  | 793.5622 | C45 H80 O8 N1 P1 | 10.126 | +H    |
| X | PC(15:0/22:6)  | PC | 15:0/22:6  | 37:6  | 791.5465 | C45 H78 O8 N1 P1 | 9.653  | +H    |
| * | PC(16:0/14:0)  | PC | 16:0/14:0  | 30:0  | 705.5309 | C38 H76 O8 N1 P1 | 10.466 | +H    |
| X | PC(16:0/16:0)  | PC | 16:0/16:0  | 32:0  | 733.5622 | C40 H80 O8 N1 P1 | 11.783 | +H    |
| X | PC(16:0/16:0)  | PC | 16:0/16:0  | 32:0  | 733.5622 | C40 H80 O8 N1 P1 | 12.032 | +H    |
| X | PC(16:0/16:1)  | PC | 16:0/16:1  | 32:1  | 731.5465 | C40 H78 O8 N1 P1 | 10.662 | +H    |
| * | PC(16:0/17:0)  | PC | 16:0/17:0  | 33:0  | 747.5778 | C41 H82 O8 N1 P1 | 12.832 | +H    |
| * | PC(16:0/18:1)  | PC | 16:0/18:1  | 34:1  | 759.5778 | C42 H82 O8 N1 P1 | 11.927 | +HCOO |
| X | PC(16:0/18:1)  | PC | 16:0/18:1  | 34:1  | 759.5778 | C42 H82 O8 N1 P1 | 12.16  | +H    |
| X | PC(16:0/18:2)  | PC | 16:0/18:2  | 34:2  | 757.5622 | C42 H80 O8 N1 P1 | 10.992 | +H    |
| X | PC(16:0/18:3)  | PC | 16:0/18:3  | 34:3  | 755.5465 | C42 H78 O8 N1 P1 | 10.233 | +H    |
| * | PC(16:0/18:3)  | PC | 16:0/18:3  | 34:3  | 755.5465 | C42 H78 O8 N1 P1 | 11.995 | +H    |
| * | PC(16:0/18:3)  | PC | 16:0/18:3  | 34:3  | 755.5465 | C42 H78 O8 N1 P1 | 12.254 | +H    |
| * | PC(16:0/20:2)  | PC | 16:0/20:2  | 36:2  | 785.5935 | C44 H84 O8 N1 P1 | 12.319 | +H    |
| * | PC(16:0/20:3)  | PC | 16:0/20:3  | 36:3  | 783.5778 | C44 H82 O8 N1 P1 | 11.417 | +H    |
| X | PC(16:0/20:3)  | PC | 16:0/20:3  | 36:3  | 783.5778 | C44 H82 O8 N1 P1 | 11.589 | +H    |
| X | PC(16:0/20:4)  | PC | 16:0/20:4  | 36:4  | 781.5622 | C44 H80 O8 N1 P1 | 10.789 | +H    |
| * | PC(16:0/20:5)  | PC | 16:0/20:5  | 36:5  | 779.5465 | C44 H78 O8 N1 P1 | 9.841  | +H    |
| * | PC(16:0/20:5)  | PC | 16:0/20:5  | 36:5  | 779.5465 | C44 H78 O8 N1 P1 | 9.966  | +H    |
| * | PC(16:0/22:5)  | PC | 16:0/22:5  | 38:5  | 807.5778 | C46 H82 O8 N1 P1 | 10.881 | +H    |
| * | PC(16:0/22:6)  | PC | 16:0/22:6  | 38:6  | 805.5622 | C46 H80 O8 N1 P1 | 10.161 | +HCOO |
| X | PC(16:0/22:6)  | PC | 16:0/22:6  | 38:6  | 805.5622 | C46 H80 O8 N1 P1 | 10.422 | +H    |
| X | PC(16:0e/16:0) | PC | 16:0e/16:0 | 32:0e | 719.5829 | C40 H82 O7 N1 P1 | 13.04  | +H    |
| * | PC(16:0e/18:2) | PC | 16:0e/18:2 | 34:2e | 743.5829 | C42 H82 O7 N1 P1 | 11.963 | +H    |
| * | PC(16:0e/20:4) | PC | 16:0e/20:4 | 36:4e | 767.5829 | C44 H82 O7 N1 P1 | 11.752 | +H    |
| * | PC(16:0e/22:4) | PC | 16:0e/22:4 | 38:4e | 795.6142 | C46 H86 O7 N1 P1 | 12.815 | +H    |
| * | PC(16:0p/16:0) | PC | 16:0p/16:0 | 32:0p | 717.5672 | C40 H80 O7 N1 P1 | 12.806 | +HCOO |

|   |                |    |            |       |          |                  |        |       |
|---|----------------|----|------------|-------|----------|------------------|--------|-------|
| * | PC(16:0p/18:2) | PC | 16:0p/18:2 | 34:2p | 741.5672 | C42 H80 O7 N1 P1 | 11.74  | +H    |
| X | PC(16:0p/20:4) | PC | 16:0p/20:4 | 36:4p | 765.5672 | C44 H80 O7 N1 P1 | 11.47  | +H    |
| * | PC(16:1/14:0)  | PC | 16:1/14:0  | 30:1  | 703.5152 | C38 H74 O8 N1 P1 | 9.124  | +H    |
| * | PC(16:1/18:1)  | PC | 16:1/18:1  | 34:2  | 757.5622 | C42 H80 O8 N1 P1 | 10.835 | +H    |
| X | PC(16:1/18:2)  | PC | 16:1/18:2  | 34:3  | 755.5465 | C42 H78 O8 N1 P1 | 9.626  | +H    |
| X | PC(16:1/18:2)  | PC | 16:1/18:2  | 34:3  | 755.5465 | C42 H78 O8 N1 P1 | 9.743  | +H    |
| * | PC(16:1/18:2)  | PC | 16:1/18:2  | 34:3  | 755.5465 | C42 H78 O8 N1 P1 | 10.001 | +H    |
| X | PC(16:1/20:4)  | PC | 16:1/20:4  | 36:5  | 779.5465 | C44 H78 O8 N1 P1 | 9.422  | +H    |
| * | PC(16:1/22:6)  | PC | 16:1/22:6  | 38:7  | 803.5465 | C46 H78 O8 N1 P1 | 9.087  | +H    |
| X | PC(16:2/18:2)  | PC | 16:2/18:2  | 34:04 | 753.5309 | C42 H76 O8 N1 P1 | 8.685  | +H    |
| X | PC(17:0/18:1)  | PC | 17:0/18:1  | 35:1  | 773.5935 | C43 H84 O8 N1 P1 | 12.96  | +H    |
| * | PC(17:0/18:2)  | PC | 17:0/18:2  | 35:2  | 771.5778 | C43 H82 O8 N1 P1 | 11.526 | +H    |
| X | PC(17:0/18:2)  | PC | 17:0/18:2  | 35:2  | 771.5778 | C43 H82 O8 N1 P1 | 11.803 | +H    |
| * | PC(17:0/20:3)  | PC | 17:0/20:3  | 37:3  | 797.5935 | C45 H84 O8 N1 P1 | 12.204 | +H    |
| X | PC(17:0/20:4)  | PC | 17:0/20:4  | 37:4  | 795.5778 | C45 H82 O8 N1 P1 | 11.391 | +H    |
| X | PC(17:0/22:6)  | PC | 17:0/22:6  | 39:6  | 819.5778 | C47 H82 O8 N1 P1 | 11.213 | +H    |
| X | PC(17:1/18:2)  | PC | 17:1/18:2  | 35:3  | 769.5622 | C43 H80 O8 N1 P1 | 10.35  | +H    |
| * | PC(18:0/16:0)  | PC | 18:0/16:0  | 34:0  | 761.5935 | C42 H84 O8 N1 P1 | 13.35  | +H    |
| * | PC(18:0/16:0)  | PC | 18:0/16:0  | 34:0  | 761.5935 | C42 H84 O8 N1 P1 | 13.602 | +H    |
| X | PC(18:0/18:0)  | PC | 18:0/18:0  | 36:0  | 789.6248 | C44 H88 O8 N1 P1 | 15.077 | +H    |
| X | PC(18:0/18:1)  | PC | 18:0/18:1  | 36:1  | 787.6091 | C44 H86 O8 N1 P1 | 13.73  | +H    |
| X | PC(18:0/18:2)  | PC | 18:0/18:2  | 36:2  | 785.5935 | C44 H84 O8 N1 P1 | 12.586 | +H    |
| * | PC(18:0/18:3)  | PC | 18:0/18:3  | 36:3  | 783.5778 | C44 H82 O8 N1 P1 | 11.83  | +H    |
| * | PC(18:0/20:2)  | PC | 18:0/20:2  | 38:2  | 813.6248 | C46 H88 O8 N1 P1 | 13.903 | +H    |
| * | PC(18:0/20:3)  | PC | 18:0/20:3  | 38:3  | 811.6091 | C46 H86 O8 N1 P1 | 12.984 | +H    |
| X | PC(18:0/20:3)  | PC | 18:0/20:3  | 38:3  | 811.6091 | C46 H86 O8 N1 P1 | 13.145 | +H    |
| * | PC(18:0/20:3)  | PC | 18:0/20:3  | 38:3  | 811.6091 | C46 H86 O8 N1 P1 | 13.461 | +HCOO |
| X | PC(18:0/20:4)  | PC | 18:0/20:4  | 38:4  | 809.5935 | C46 H84 O8 N1 P1 | 11.851 | +H    |
| X | PC(18:0/20:4)  | PC | 18:0/20:4  | 38:4  | 809.5935 | C46 H84 O8 N1 P1 | 12.124 | +HCOO |
| X | PC(18:0/20:4)  | PC | 18:0/20:4  | 38:4  | 809.5935 | C46 H84 O8 N1 P1 | 12.38  | +H    |

|   |                |    |            |       |          |                  |        |       |
|---|----------------|----|------------|-------|----------|------------------|--------|-------|
| X | PC(18:0/20:5)  | PC | 18:0/20:5  | 38:5  | 807.5778 | C46 H82 O8 N1 P1 | 11.416 | +H    |
| X | PC(18:0/22:4)  | PC | 18:0/22:4  | 40:4  | 837.6248 | C48 H88 O8 N1 P1 | 13.415 | +H    |
| X | PC(18:0/22:5)  | PC | 18:0/22:5  | 40:5  | 835.6091 | C48 H86 O8 N1 P1 | 11.792 | +H    |
| X | PC(18:0/22:5)  | PC | 18:0/22:5  | 40:5  | 835.6091 | C48 H86 O8 N1 P1 | 12.961 | +H    |
| X | PC(18:0/22:6)  | PC | 18:0/22:6  | 40:6  | 833.5935 | C48 H84 O8 N1 P1 | 11.755 | +H    |
| X | PC(18:0/22:6)  | PC | 18:0/22:6  | 40:6  | 833.5935 | C48 H84 O8 N1 P1 | 11.99  | +H    |
| X | PC(18:0e/16:0) | PC | 18:0e/16:0 | 34:0e | 747.6142 | C42 H86 O7 N1 P1 | 14.668 | +H    |
| * | PC(18:0p/16:0) | PC | 18:0p/16:0 | 34:0p | 745.5985 | C42 H84 O7 N1 P1 | 13.074 | +HCOO |
| X | PC(18:1/18:1)  | PC | 18:1/18:1  | 36:2  | 785.5935 | C44 H84 O8 N1 P1 | 12.36  | +H    |
| X | PC(18:1/18:2)  | PC | 18:1/18:2  | 36:3  | 783.5778 | C44 H82 O8 N1 P1 | 11.082 | +H    |
| * | PC(18:1/20:3)  | PC | 18:1/20:3  | 38:4  | 809.5935 | C46 H84 O8 N1 P1 | 11.482 | +HCOO |
| X | PC(18:1/20:4)  | PC | 18:1/20:4  | 38:05 | 807.5778 | C46 H82 O8 N1 P1 | 11.168 | +H    |
| X | PC(18:1/20:4)  | PC | 18:1/20:4  | 38:5  | 807.5778 | C46 H82 O8 N1 P1 | 11.237 | +H    |
| * | PC(18:1/20:5)  | PC | 18:1/20:5  | 38:6  | 805.5622 | C46 H80 O8 N1 P1 | 9.741  | +H    |
| * | PC(18:1/22:4)  | PC | 18:1/22:4  | 40:5  | 835.6091 | C48 H86 O8 N1 P1 | 12.004 | +HCOO |
| X | PC(18:1/22:5)  | PC | 18:1/22:5  | 40:6  | 833.5935 | C48 H84 O8 N1 P1 | 11     | +H    |
| X | PC(18:1/22:6)  | PC | 18:1/22:6  | 40:7  | 831.5778 | C48 H82 O8 N1 P1 | 10.505 | +H    |
| * | PC(18:2/13:0)  | PC | 18:2/13:0  | 31:2  | 715.5152 | C39 H74 O8 N1 P1 | 11.399 | +H    |
| X | PC(18:2/18:2)  | PC | 18:2/18:2  | 36:4  | 781.5622 | C44 H80 O8 N1 P1 | 9.953  | +H    |
| X | PC(18:2/20:4)  | PC | 18:2/20:4  | 38:6  | 805.5622 | C46 H80 O8 N1 P1 | 9.734  | +H    |
| * | PC(18:2/22:6)  | PC | 18:2/22:6  | 40:8  | 829.5622 | C48 H80 O8 N1 P1 | 9.424  | +H    |
| X | PC(18:3/18:2)  | PC | 18:3/18:2  | 36:5  | 779.5465 | C44 H78 O8 N1 P1 | 9.046  | +H    |
| X | PC(19:0/18:2)  | PC | 19:0/18:2  | 37:2  | 799.6091 | C45 H86 O8 N1 P1 | 13.385 | +H    |
| * | PC(19:0/20:4)  | PC | 19:0/20:4  | 39:4  | 823.6091 | C47 H86 O8 N1 P1 | 12.828 | +H    |
| X | PC(19:0/20:4)  | PC | 19:0/20:4  | 39:4  | 823.6091 | C47 H86 O8 N1 P1 | 13.165 | +H    |
| * | PC(19:0/22:6)  | PC | 19:0/22:6  | 41:6  | 847.6091 | C49 H86 O8 N1 P1 | 12.794 | +H    |
| X | PC(20:0/18:2)  | PC | 20:0/18:2  | 38:2  | 813.6248 | C46 H88 O8 N1 P1 | 14.157 | +H    |
| * | PC(20:0/20:4)  | PC | 20:0/20:4  | 40:4  | 837.6248 | C48 H88 O8 N1 P1 | 13.677 | +H    |
| X | PC(20:0/20:4)  | PC | 20:0/20:4  | 40:4  | 837.6248 | C48 H88 O8 N1 P1 | 13.953 | +H    |
| * | PC(20:1/18:1)  | PC | 20:1/18:1  | 38:2  | 813.6248 | C46 H88 O8 N1 P1 | 13.671 | +H    |

|   |               |    |           |       |          |                  |        |       |
|---|---------------|----|-----------|-------|----------|------------------|--------|-------|
| X | PC(20:1/22:6) | PC | 20:1/22:6 | 42:7  | 859.6091 | C50 H86 O8 N1 P1 | 11.958 | +H    |
| X | PC(20:2/18:2) | PC | 20:2/18:2 | 38:4  | 809.5935 | C46 H84 O8 N1 P1 | 11.343 | +H    |
| * | PC(20:2/22:5) | PC | 20:2/22:5 | 42:7  | 859.6091 | C50 H86 O8 N1 P1 | 11.211 | +H    |
| * | PC(20:2/22:6) | PC | 20:2/22:6 | 42:8  | 857.5935 | C50 H84 O8 N1 P1 | 10.74  | +HCOO |
| X | PC(20:3/18:2) | PC | 20:3/18:2 | 38:5  | 807.5778 | C46 H82 O8 N1 P1 | 10.495 | +H    |
| * | PC(20:3/20:4) | PC | 20:3/20:4 | 40:7  | 831.5778 | C48 H82 O8 N1 P1 | 10.107 | +H    |
| X | PC(20:3/22:5) | PC | 20:3/22:5 | 42:8  | 857.5935 | C50 H84 O8 N1 P1 | 10.611 | +H    |
| * | PC(20:5/18:2) | PC | 20:5/18:2 | 38:7  | 803.5465 | C46 H78 O8 N1 P1 | 8.806  | +H    |
| X | PC(22:5/18:2) | PC | 22:5/18:2 | 40:7  | 831.5778 | C48 H82 O8 N1 P1 | 9.848  | +H    |
| * | PC(24:0/18:2) | PC | 24:0/18:2 | 42:02 | 869.6874 | C50 H96 O8 N1 P1 | 16.799 | +H    |
| X | PE(14:0/18:2) | PE | 14:0/18:2 | 32:2  | 687.4839 | C37 H70 O8 N1 P1 | 9.815  | +H    |
| * | PE(14:0/20:4) | PE | 14:0/20:4 | 34:4  | 711.4839 | C39 H70 O8 N1 P1 | 9.596  | -H    |
| X | PE(15:0/18:2) | PE | 15:0/18:2 | 33:2  | 701.4996 | C38 H72 O8 N1 P1 | 10.592 | +H    |
| * | PE(15:0/20:4) | PE | 15:0/20:4 | 35:4  | 725.4996 | C40 H72 O8 N1 P1 | 10.384 | +H    |
| X | PE(15:0/22:6) | PE | 15:0/22:6 | 37:6  | 749.4996 | C42 H72 O8 N1 P1 | 10.017 | +H    |
| X | PE(16:0/16:1) | PE | 16:0/16:1 | 32:1  | 689.4996 | C37 H72 O8 N1 P1 | 11.061 | +H    |
| * | PE(16:0/18:1) | PE | 16:0/18:1 | 34:1  | 717.5309 | C39 H76 O8 N1 P1 | 12.356 | +H    |
| X | PE(16:0/18:1) | PE | 16:0/18:1 | 34:1  | 717.5309 | C39 H76 O8 N1 P1 | 12.565 | +H    |
| X | PE(16:0/18:2) | PE | 16:0/18:2 | 34:2  | 715.5152 | C39 H74 O8 N1 P1 | 11.39  | +H    |
| * | PE(16:0/18:3) | PE | 16:0/18:3 | 34:3  | 713.4996 | C39 H72 O8 N1 P1 | 10.38  | +H    |
| X | PE(16:0/18:3) | PE | 16:0/18:3 | 34:3  | 713.4996 | C39 H72 O8 N1 P1 | 10.602 | +H    |
| X | PE(16:0/20:1) | PE | 16:0/20:1 | 36:1  | 745.5622 | C41 H80 O8 N1 P1 | 14.221 | +H    |
| * | PE(16:0/20:3) | PE | 16:0/20:3 | 36:3  | 741.5309 | C41 H76 O8 N1 P1 | 11.796 | +H    |
| X | PE(16:0/20:4) | PE | 16:0/20:4 | 36:4  | 739.5152 | C41 H74 O8 N1 P1 | 11.17  | +H    |
| * | PE(16:0/20:5) | PE | 16:0/20:5 | 36:5  | 737.4996 | C41 H72 O8 N1 P1 | 10.205 | +H    |
| * | PE(16:0/22:4) | PE | 16:0/22:4 | 38:4  | 767.5465 | C43 H78 O8 N1 P1 | 12.083 | -H    |
| X | PE(16:0/22:4) | PE | 16:0/22:4 | 38:4  | 767.5465 | C43 H78 O8 N1 P1 | 12.242 | +H    |
| X | PE(16:0/22:5) | PE | 16:0/22:5 | 38:5  | 765.5309 | C43 H76 O8 N1 P1 | 11.891 | +H    |
| X | PE(16:0/22:6) | PE | 16:0/22:6 | 38:6  | 763.5152 | C43 H74 O8 N1 P1 | 10.543 | +H    |
| X | PE(16:0/22:6) | PE | 16:0/22:6 | 38:6  | 763.5152 | C43 H74 O8 N1 P1 | 10.815 | +H    |

|   |                |    |            |       |          |                  |        |    |
|---|----------------|----|------------|-------|----------|------------------|--------|----|
| * | PE(16:0e/20:4) | PE | 16:0e/20:4 | 36:4e | 725.5359 | C41 H76 O7 N1 P1 | 12.181 | -H |
| X | PE(16:0p/18:2) | PE | 16:0p/18:2 | 34:2p | 699.5203 | C39 H74 O7 N1 P1 | 12.166 | +H |
| * | PE(16:0p/20:3) | PE | 16:0p/20:3 | 36:3p | 725.5359 | C41 H76 O7 N1 P1 | 12.565 | +H |
| * | PE(16:0p/20:4) | PE | 16:0p/20:4 | 36:4p | 723.5203 | C41 H74 O7 N1 P1 | 11.916 | +H |
| X | PE(16:0p/20:5) | PE | 16:0p/20:5 | 36:5p | 721.5046 | C41 H72 O7 N1 P1 | 10.927 | +H |
| X | PE(16:0p/22:4) | PE | 16:0p/22:4 | 38:4p | 751.5516 | C43 H78 O7 N1 P1 | 13.018 | +H |
| * | PE(16:0p/22:5) | PE | 16:0p/22:5 | 38:5p | 749.5359 | C43 H76 O7 N1 P1 | 12.019 | -H |
| * | PE(16:0p/22:5) | PE | 16:0p/22:5 | 38:5p | 749.5359 | C43 H76 O7 N1 P1 | 12.549 | +H |
| * | PE(16:0p/22:6) | PE | 16:0p/22:6 | 38:6p | 747.5203 | C43 H74 O7 N1 P1 | 11.522 | +H |
| X | PE(16:1/18:2)  | PE | 16:1/18:2  | 34:3  | 713.4996 | C39 H72 O8 N1 P1 | 9.985  | +H |
| X | PE(16:1/20:4)  | PE | 16:1/20:4  | 36:5  | 737.4996 | C41 H72 O8 N1 P1 | 9.784  | +H |
| * | PE(16:1/22:6)  | PE | 16:1/22:6  | 38:7  | 761.4996 | C43 H72 O8 N1 P1 | 9.433  | +H |
| * | PE(16:1/22:6)  | PE | 16:1/22:6  | 38:07 | 761.4996 | C43 H72 O8 N1 P1 | 9.569  | +H |
| X | PE(17:0/18:2)  | PE | 17:0/18:2  | 35:2  | 729.5309 | C40 H76 O8 N1 P1 | 12.195 | +H |
| * | PE(17:0/20:3)  | PE | 17:0/20:3  | 37:3  | 755.5465 | C42 H78 O8 N1 P1 | 12.582 | -H |
| X | PE(17:0/20:4)  | PE | 17:0/20:4  | 37:4  | 753.5309 | C42 H76 O8 N1 P1 | 11.981 | +H |
| X | PE(17:0/20:4)  | PE | 17:0/20:4  | 37:4  | 753.5309 | C42 H76 O8 N1 P1 | 11.79  | +H |
| * | PE(17:0/22:6)  | PE | 17:0/22:6  | 39:6  | 777.5309 | C44 H76 O8 N1 P1 | 11.314 | +H |
| X | PE(17:0/22:6)  | PE | 17:0/22:6  | 39:6  | 777.5309 | C44 H76 O8 N1 P1 | 11.611 | +H |
| X | PE(17:1/20:4)  | PE | 17:1/20:4  | 37:5  | 751.5152 | C42 H74 O8 N1 P1 | 10.535 | +H |
| * | PE(17:1/22:6)  | PE | 17:1/22:6  | 39:7  | 775.5152 | C44 H74 O8 N1 P1 | 10.168 | +H |
| X | PE(18:0/16:0)  | PE | 18:0/16:0  | 34:0  | 719.5465 | C39 H78 O8 N1 P1 | 12.11  | -H |
| * | PE(18:0/18:1)  | PE | 18:0/18:1  | 36:1  | 745.5622 | C41 H80 O8 N1 P1 | 14.122 | +H |
| X | PE(18:0/18:2)  | PE | 18:0/18:2  | 36:2  | 743.5465 | C41 H78 O8 N1 P1 | 12.999 | +H |
| X | PE(18:0/18:3)  | PE | 18:0/18:3  | 36:3  | 741.5309 | C41 H76 O8 N1 P1 | 11.985 | +H |
| * | PE(18:0/18:3)  | PE | 18:0/18:3  | 36:3  | 741.5309 | C41 H76 O8 N1 P1 | 12.224 | +H |
| * | PE(18:0/20:1)  | PE | 18:0/20:1  | 38:1  | 773.5935 | C43 H84 O8 N1 P1 | 15.518 | +H |
| X | PE(18:0/20:2)  | PE | 18:0/20:2  | 38:2  | 771.5778 | C43 H82 O8 N1 P1 | 14.297 | +H |
| * | PE(18:0/20:3)  | PE | 18:0/20:3  | 38:03 | 769.5622 | C43 H80 O8 N1 P1 | 13.374 | +H |
| X | PE(18:0/20:3)  | PE | 18:0/20:3  | 38:3  | 769.5622 | C43 H80 O8 N1 P1 | 13.451 | +H |

|   |                |    |            |       |          |                  |        |    |
|---|----------------|----|------------|-------|----------|------------------|--------|----|
| X | PE(18:0/20:3)  | PE | 18:0/20:3  | 38:3  | 769.5622 | C43 H80 O8 N1 P1 | 13.864 | +H |
| * | PE(18:0/20:4)  | PE | 18:0/20:4  | 38:4  | 767.5465 | C43 H78 O8 N1 P1 | 12.513 | +H |
| X | PE(18:0/20:4)  | PE | 18:0/20:4  | 38:4  | 767.5465 | C43 H78 O8 N1 P1 | 12.799 | +H |
| * | PE(18:0/20:5)  | PE | 18:0/20:5  | 38:5  | 765.5309 | C43 H76 O8 N1 P1 | 9.272  | +H |
| * | PE(18:0/20:5)  | PE | 18:0/20:5  | 38:5  | 765.5309 | C43 H76 O8 N1 P1 | 9.559  | +H |
| * | PE(18:0/20:5)  | PE | 18:0/20:5  | 38:5  | 765.5309 | C43 H76 O8 N1 P1 | 9.927  | +H |
| * | PE(18:0/20:5)  | PE | 18:0/20:5  | 38:5  | 765.5309 | C43 H76 O8 N1 P1 | 11.807 | +H |
| * | PE(18:0/20:5)  | PE | 18:0/20:5  | 38:5  | 765.5309 | C43 H76 O8 N1 P1 | 11.952 | -H |
| * | PE(18:0/22:4)  | PE | 18:0/22:4  | 40:4  | 795.5778 | C45 H82 O8 N1 P1 | 13.667 | +H |
| X | PE(18:0/22:4)  | PE | 18:0/22:4  | 40:4  | 795.5778 | C45 H82 O8 N1 P1 | 13.809 | -H |
| X | PE(18:0/22:5)  | PE | 18:0/22:5  | 40:5  | 793.5622 | C45 H80 O8 N1 P1 | 12.856 | +H |
| X | PE(18:0/22:5)  | PE | 18:0/22:5  | 40:5  | 793.5622 | C45 H80 O8 N1 P1 | 13.366 | +H |
| * | PE(18:0/22:6)  | PE | 18:0/22:6  | 40:6  | 791.5465 | C45 H78 O8 N1 P1 | 12.142 | +H |
| X | PE(18:0/22:6)  | PE | 18:0/22:6  | 40:6  | 791.5465 | C45 H78 O8 N1 P1 | 12.274 | -H |
| X | PE(18:0/22:6)  | PE | 18:0/22:6  | 40:6  | 791.5465 | C45 H78 O8 N1 P1 | 12.407 | +H |
| * | PE(18:0e/20:4) | PE | 18:0e/20:4 | 38:4e | 753.5672 | C43 H80 O7 N1 P1 | 13.81  | +H |
| * | PE(18:0e/22:4) | PE | 18:0e/22:4 | 40:4e | 781.5985 | C45 H84 O7 N1 P1 | 14.77  | -H |
| * | PE(18:0e/22:5) | PE | 18:0e/22:5 | 40:5e | 779.5829 | C45 H82 O7 N1 P1 | 13.314 | +H |
| * | PE(18:0e/22:5) | PE | 18:0e/22:5 | 40:5e | 779.5829 | C45 H82 O7 N1 P1 | 13.845 | -H |
| * | PE(18:0p/18:1) | PE | 18:0p/18:1 | 36:1p | 729.5672 | C41 H80 O7 N1 P1 | 14.898 | +H |
| * | PE(18:0p/18:2) | PE | 18:0p/18:2 | 36:2p | 727.5516 | C41 H78 O7 N1 P1 | 13.771 | +H |
| X | PE(18:0p/20:3) | PE | 18:0p/20:3 | 38:3p | 753.5672 | C43 H80 O7 N1 P1 | 14.143 | +H |
| * | PE(18:0p/20:4) | PE | 18:0p/20:4 | 38:4p | 751.5516 | C43 H78 O7 N1 P1 | 13.266 | +H |
| X | PE(18:0p/20:4) | PE | 18:0p/20:4 | 38:4p | 751.5516 | C43 H78 O7 N1 P1 | 13.528 | +H |
| * | PE(18:0p/22:4) | PE | 18:0p/22:4 | 40:4p | 779.5829 | C45 H82 O7 N1 P1 | 13.302 | -H |
| * | PE(18:0p/22:4) | PE | 18:0p/22:4 | 40:4p | 779.5829 | C45 H82 O7 N1 P1 | 14.538 | +H |
| * | PE(18:0p/22:5) | PE | 18:0p/22:5 | 40:5p | 777.5672 | C45 H80 O7 N1 P1 | 13.405 | +H |
| X | PE(18:0p/22:5) | PE | 18:0p/22:5 | 40:5p | 777.5672 | C45 H80 O7 N1 P1 | 13.592 | +H |
| * | PE(18:0p/22:5) | PE | 18:0p/22:5 | 40:5p | 777.5672 | C45 H80 O7 N1 P1 | 14.1   | +H |
| X | PE(18:0p/22:6) | PE | 18:0p/22:6 | 40:6p | 775.5516 | C45 H78 O7 N1 P1 | 13.123 | +H |

|   |                |    |            |       |          |                  |        |    |
|---|----------------|----|------------|-------|----------|------------------|--------|----|
| X | PE(18:1/18:1)  | PE | 18:1/18:1  | 36:2  | 743.5465 | C41 H78 O8 N1 P1 | 12.726 | +H |
| X | PE(18:1/18:2)  | PE | 18:1/18:2  | 36:3  | 741.5309 | C41 H76 O8 N1 P1 | 11.5   | +H |
| * | PE(18:1/20:3)  | PE | 18:1/20:3  | 38:4  | 767.5465 | C43 H78 O8 N1 P1 | 11.911 | +H |
| * | PE(18:1/20:4)  | PE | 18:1/20:4  | 38:5  | 765.5309 | C43 H76 O8 N1 P1 | 11.126 | +H |
| X | PE(18:1/20:4)  | PE | 18:1/20:4  | 38:5  | 765.5309 | C43 H76 O8 N1 P1 | 11.273 | +H |
| * | PE(18:1/20:4)  | PE | 18:1/20:4  | 38:5  | 765.5309 | C43 H76 O8 N1 P1 | 11.545 | -H |
| * | PE(18:1/20:5)  | PE | 18:1/20:5  | 38:6  | 763.5152 | C43 H74 O8 N1 P1 | 10.35  | +H |
| X | PE(18:1/22:5)  | PE | 18:1/22:5  | 40:6  | 791.5465 | C45 H78 O8 N1 P1 | 11.33  | +H |
| X | PE(18:1/22:6)  | PE | 18:1/22:6  | 40:7  | 789.5309 | C45 H76 O8 N1 P1 | 10.898 | +H |
| * | PE(18:1/22:6)  | PE | 18:1/22:6  | 40:7  | 789.5309 | C45 H76 O8 N1 P1 | 11.197 | -H |
| X | PE(18:1p/16:0) | PE | 18:1p/16:0 | 34:1p | 701.5359 | C39 H76 O7 N1 P1 | 13.362 | -H |
| * | PE(18:1p/18:1) | PE | 18:1p/18:1 | 36:2p | 727.5516 | C41 H78 O7 N1 P1 | 13.501 | +H |
| X | PE(18:1p/18:2) | PE | 18:1p/18:2 | 36:3p | 725.5359 | C41 H76 O7 N1 P1 | 12.222 | +H |
| X | PE(18:1p/20:4) | PE | 18:1p/20:4 | 38:5p | 749.5359 | C43 H76 O7 N1 P1 | 11.99  | +H |
| * | PE(18:1p/20:5) | PE | 18:1p/20:5 | 38:6p | 747.5203 | C43 H74 O7 N1 P1 | 11.012 | +H |
| X | PE(18:1p/22:4) | PE | 18:1p/22:4 | 40:5p | 777.5672 | C45 H80 O7 N1 P1 | 13.094 | +H |
| * | PE(18:1p/22:5) | PE | 18:1p/22:5 | 40:6p | 775.5516 | C45 H78 O7 N1 P1 | 12.115 | +H |
| * | PE(18:1p/22:5) | PE | 18:1p/22:5 | 40:6p | 775.5516 | C45 H78 O7 N1 P1 | 12.247 | +H |
| * | PE(18:1p/22:5) | PE | 18:1p/22:5 | 40:6p | 775.5516 | C45 H78 O7 N1 P1 | 12.582 | -H |
| * | PE(18:1p/22:6) | PE | 18:1p/22:6 | 40:7p | 773.5359 | C45 H76 O7 N1 P1 | 11.617 | +H |
| X | PE(18:2/18:2)  | PE | 18:2/18:2  | 36:4  | 739.5152 | C41 H74 O8 N1 P1 | 10.309 | +H |
| * | PE(18:2/18:2)  | PE | 18:2/18:2  | 36:4  | 739.5152 | C41 H74 O8 N1 P1 | 10.661 | +H |
| * | PE(18:2/20:4)  | PE | 18:2/20:4  | 38:6  | 763.5152 | C43 H74 O8 N1 P1 | 10.092 | +H |
| X | PE(18:2/22:6)  | PE | 18:2/22:6  | 40:8  | 787.5152 | C45 H74 O8 N1 P1 | 9.82   | +H |
| * | PE(18:2p/20:4) | PE | 18:2p/20:4 | 38:6p | 747.5203 | C43 H74 O7 N1 P1 | 10.819 | +H |
| * | PE(18:2p/22:4) | PE | 18:2p/22:4 | 40:6p | 775.5516 | C45 H78 O7 N1 P1 | 11.915 | +H |
| * | PE(18:2p/22:5) | PE | 18:2p/22:5 | 40:7p | 773.5359 | C45 H76 O7 N1 P1 | 10.92  | +H |
| * | PE(18:2p/22:6) | PE | 18:2p/22:6 | 40:8p | 771.5203 | C45 H74 O7 N1 P1 | 10.43  | +H |
| X | PE(18:3/18:2)  | PE | 18:3/18:2  | 36:5  | 737.4996 | C41 H72 O8 N1 P1 | 9.319  | -H |
| X | PE(18:3/20:4)  | PE | 18:3/20:4  | 38:7  | 761.4996 | C43 H72 O8 N1 P1 | 9.13   | +H |



|   |                |    |            |       |          |                  |        |    |
|---|----------------|----|------------|-------|----------|------------------|--------|----|
| X | PE(19:0/18:2)  | PE | 19:0/18:2  | 37:2  | 757.5622 | C42 H80 O8 N1 P1 | 13.44  | +H |
| * | PE(19:0/18:2)  | PE | 19:0/18:2  | 37:2  | 757.5622 | C42 H80 O8 N1 P1 | 13.778 | +H |
| X | PE(19:0/20:4)  | PE | 19:0/20:4  | 39:4  | 781.5622 | C44 H80 O8 N1 P1 | 13.234 | +H |
| * | PE(19:0/20:4)  | PE | 19:0/20:4  | 39:4  | 781.5622 | C44 H80 O8 N1 P1 | 13.56  | +H |
| * | PE(19:0/22:5)  | PE | 19:0/22:5  | 41:5  | 807.5778 | C46 H82 O8 N1 P1 | 13.63  | +H |
| * | PE(19:0/22:6)  | PE | 19:0/22:6  | 41:6  | 805.5622 | C46 H80 O8 N1 P1 | 12.879 | -H |
| X | PE(19:0/22:6)  | PE | 19:0/22:6  | 41:6  | 805.5622 | C46 H80 O8 N1 P1 | 13.197 | +H |
| * | PE(20:0/18:2)  | PE | 20:0/18:2  | 38:2  | 771.5778 | C43 H82 O8 N1 P1 | 14.533 | +H |
| * | PE(20:0/20:4)  | PE | 20:0/20:4  | 40:4  | 795.5778 | C45 H82 O8 N1 P1 | 14.083 | +H |
| X | PE(20:0/20:4)  | PE | 20:0/20:4  | 40:4  | 795.5778 | C45 H82 O8 N1 P1 | 14.339 | +H |
| * | PE(20:0/22:5)  | PE | 20:0/22:5  | 42:5  | 821.5935 | C47 H84 O8 N1 P1 | 14.394 | +H |
| X | PE(20:0/22:6)  | PE | 20:0/22:6  | 42:6  | 819.5778 | C47 H82 O8 N1 P1 | 12.061 | -H |
| * | PE(20:0e/20:4) | PE | 20:0e/20:4 | 40:4e | 781.5985 | C45 H84 O7 N1 P1 | 15.304 | -H |
| * | PE(20:0e/22:5) | PE | 20:0e/22:5 | 42:5e | 807.6142 | C47 H86 O7 N1 P1 | 15.377 | -H |
| * | PE(20:0e/22:6) | PE | 20:0e/22:6 | 42:6e | 805.5985 | C47 H84 O7 N1 P1 | 14.953 | +H |
| X | PE(20:0p/18:2) | PE | 20:0p/18:2 | 38:2p | 755.5829 | C43 H82 O7 N1 P1 | 15.35  | +H |
| * | PE(20:0p/20:4) | PE | 20:0p/20:4 | 40:4p | 779.5829 | C45 H82 O7 N1 P1 | 14.803 | +H |
| X | PE(20:0p/20:4) | PE | 20:0p/20:4 | 40:4p | 779.5829 | C45 H82 O7 N1 P1 | 15.063 | +H |
| * | PE(20:0p/22:4) | PE | 20:0p/22:4 | 42:4p | 807.6142 | C47 H86 O7 N1 P1 | 15.97  | +H |
| X | PE(20:0p/22:6) | PE | 20:0p/22:6 | 42:6p | 803.5829 | C47 H82 O7 N1 P1 | 14.678 | +H |
| * | PE(20:1/22:5)  | PE | 20:1/22:5  | 42:6  | 819.5778 | C47 H82 O8 N1 P1 | 12.824 | -H |
| X | PE(20:1/22:6)  | PE | 20:1/22:6  | 42:7  | 817.5622 | C47 H80 O8 N1 P1 | 12.369 | +H |
| * | PE(20:2/18:2)  | PE | 20:2/18:2  | 38:4  | 767.5465 | C43 H78 O8 N1 P1 | 11.746 | +H |
| * | PE(20:2/20:4)  | PE | 20:2/20:4  | 40:6  | 791.5465 | C45 H78 O8 N1 P1 | 11.52  | +H |
| * | PE(20:2/22:5)  | PE | 20:2/22:5  | 42:7  | 817.5622 | C47 H80 O8 N1 P1 | 11.597 | +H |
| X | PE(20:2/22:6)  | PE | 20:2/22:6  | 42:8  | 815.5465 | C47 H78 O8 N1 P1 | 11.145 | +H |
| * | PE(20:3/20:4)  | PE | 20:3/20:4  | 40:7  | 789.5309 | C45 H76 O8 N1 P1 | 10.481 | +H |
| * | PE(20:4/20:4)  | PE | 20:4/20:4  | 40:8  | 787.5152 | C45 H74 O8 N1 P1 | 9.762  | +H |
| * | PE(22:0/20:4)  | PE | 22:0/20:4  | 42:4  | 823.6091 | C47 H86 O8 N1 P1 | 15.794 | +H |
| * | PE(22:5/18:2)  | PE | 22:5/18:2  | 40:7  | 789.5309 | C45 H76 O8 N1 P1 | 10.198 | +H |

|   |               |    |           |       |          |                   |        |    |
|---|---------------|----|-----------|-------|----------|-------------------|--------|----|
| * | PE(24:0/18:2) | PE | 24:0/18:2 | 42:2  | 827.6404 | C47 H90 O8 N1 P1  | 17.074 | +H |
| * | PE(24:0/20:4) | PE | 24:0/20:4 | 44:4  | 851.6404 | C49 H90 O8 N1 P1  | 16.93  | +H |
| X | PG(16:0,18:1) | PG | 16:0/18:1 | 34:1  | 748.5254 | C40 H77 O10 N0 P1 | 11.567 | -H |
| X | PG(16:0,18:2) | PG | 16:0/18:2 | 34:2  | 746.5098 | C40 H75 O10 N0 P1 | 10.516 | -H |
| * | PG(16:0,20:2) | PG | 16:0/20:2 | 36:2  | 774.5411 | C42 H79 O10 N0 P1 | 11.837 | -H |
| * | PG(16:0,20:3) | PG | 16:0/20:3 | 36:3  | 772.5254 | C42 H77 O10 N0 P1 | 10.851 | -H |
| * | PG(18:0,18:2) | PG | 18:0/18:2 | 36:2  | 774.5411 | C42 H79 O10 N0 P1 | 12.057 | -H |
| X | PG(18:1,18:1) | PG | 18:1/18:1 | 36:2  | 774.5411 | C42 H79 O10 N0 P1 | 10.8   | -H |
| X | PG(18:1,18:2) | PG | 18:1/18:2 | 36:3  | 772.5254 | C42 H77 O10 N0 P1 | 9.72   | -H |
| * | PG(18:1,18:2) | PG | 18:1/18:2 | 36:3  | 772.5254 | C42 H77 O10 N0 P1 | 10.557 | -H |
| X | PG(18:2,18:2) | PG | 18:2/18:2 | 36:4  | 770.5098 | C42 H75 O10 N0 P1 | 8.695  | -H |
| * | PG(18:2,18:2) | PG | 18:2/18:2 | 36:4  | 770.5098 | C42 H75 O10 N0 P1 | 9.509  | -H |
| X | PG(18:2,22:6) | PG | 18:2/22:6 | 40:8  | 818.5098 | C46 H75 O10 N0 P1 | 8.238  | -H |
| * | PG(22:6,22:6) | PG | 22:6/22:6 | 44:12 | 866.5098 | C50 H75 O10 N0 P1 | 7.79   | -H |
| * | PI(16:0,16:0) | PI | 16:0/16:0 | 32:0  | 810.5258 | C41 H79 O13 N0 P1 | 11.14  | -H |
| X | PI(16:0,18:2) | PI | 16:0/18:2 | 34:2  | 834.5258 | C43 H79 O13 N0 P1 | 10.159 | -H |
| * | PI(16:0,20:3) | PI | 16:0/20:3 | 36:3  | 860.5415 | C45 H81 O13 N0 P1 | 10.563 | -H |
| X | PI(16:0,20:4) | PI | 16:0/20:4 | 36:4  | 858.5258 | C45 H79 O13 N0 P1 | 9.987  | -H |
| * | PI(16:0,22:4) | PI | 16:0/22:4 | 38:04 | 886.5571 | C47 H83 O13 N0 P1 | 11.008 | -H |
| * | PI(16:0,22:5) | PI | 16:0/22:5 | 38:5  | 884.5415 | C47 H81 O13 N0 P1 | 10.104 | -H |
| X | PI(16:0,22:6) | PI | 16:0/22:6 | 38:6  | 882.5258 | C47 H79 O13 N0 P1 | 9.647  | -H |
| * | PI(17:0,18:2) | PI | 17:0/18:2 | 35:2  | 848.5415 | C44 H81 O13 N0 P1 | 10.938 | -H |
| X | PI(17:0,20:3) | PI | 17:0/20:3 | 37:3  | 874.5571 | C46 H83 O13 N0 P1 | 11.318 | -H |
| X | PI(17:0,20:4) | PI | 17:0/20:4 | 37:4  | 872.5415 | C46 H81 O13 N0 P1 | 10.768 | -H |
| * | PI(18:0,16:0) | PI | 18:0/16:0 | 34:0  | 838.5571 | C43 H83 O13 N0 P1 | 12.694 | -H |
| * | PI(18:0,18:0) | PI | 18:0/18:0 | 36:0  | 866.5884 | C45 H87 O13 N0 P1 | 14.165 | -H |
| X | PI(18:0,18:2) | PI | 18:0/18:2 | 36:2  | 862.5571 | C45 H83 O13 N0 P1 | 11.701 | -H |
| * | PI(18:0,20:1) | PI | 18:0/20:1 | 38:1  | 892.6041 | C47 H89 O13 N0 P1 | 14.126 | -H |
| X | PI(18:0,20:2) | PI | 18:0/20:2 | 38:2  | 890.5884 | C47 H87 O13 N0 P1 | 13.019 | -H |
| * | PI(18:0,20:3) | PI | 18:0/20:3 | 38:3  | 888.5728 | C47 H85 O13 N0 P1 | 11.98  | -H |

|   |               |    |           |       |          |                   |        |      |
|---|---------------|----|-----------|-------|----------|-------------------|--------|------|
| X | PI(18:0,20:3) | PI | 18:0/20:3 | 38:3  | 888.5728 | C47 H85 O13 N0 P1 | 12.112 | -H   |
| X | PI(18:0,20:3) | PI | 18:0/20:3 | 38:3  | 888.5728 | C47 H85 O13 N0 P1 | 12.285 | -H   |
| * | PI(18:0,20:3) | PI | 18:0/20:3 | 38:3  | 888.5728 | C47 H85 O13 N0 P1 | 12.615 | -H   |
| X | PI(18:0,20:4) | PI | 18:0/20:4 | 38:4  | 886.5571 | C47 H83 O13 N0 P1 | 11.512 | -H   |
| X | PI(18:0,20:5) | PI | 18:0/20:5 | 38:5  | 884.5415 | C47 H81 O13 N0 P1 | 10.611 | -H   |
| X | PI(18:0,20:5) | PI | 18:0/20:5 | 38:5  | 884.5415 | C47 H81 O13 N0 P1 | 11.181 | -H   |
| * | PI(18:0,20:5) | PI | 18:0/20:5 | 38:5  | 884.5415 | C47 H81 O13 N0 P1 | 11.526 | -H   |
| X | PI(18:0,22:4) | PI | 18:0/22:4 | 40:4  | 914.5884 | C49 H87 O13 N0 P1 | 12.55  | -H   |
| * | PI(18:0,22:5) | PI | 18:0/22:5 | 40:5  | 912.5728 | C49 H85 O13 N0 P1 | 11.439 | -H   |
| X | PI(18:0,22:5) | PI | 18:0/22:5 | 40:5  | 912.5728 | C49 H85 O13 N0 P1 | 11.591 | -H   |
| * | PI(18:0,22:5) | PI | 18:0/22:5 | 40:5  | 912.5728 | C49 H85 O13 N0 P1 | 11.719 | -H   |
| X | PI(18:0,22:5) | PI | 18:0/22:5 | 40:5  | 912.5728 | C49 H85 O13 N0 P1 | 12.127 | -H   |
| * | PI(18:0,22:6) | PI | 18:0/22:6 | 40:6  | 910.5571 | C49 H83 O13 N0 P1 | 11.006 | -H   |
| X | PI(18:0,22:6) | PI | 18:0/22:6 | 40:6  | 910.5571 | C49 H83 O13 N0 P1 | 11.182 | -H   |
| X | PI(18:1,18:2) | PI | 18:1/18:2 | 36:3  | 860.5415 | C45 H81 O13 N0 P1 | 10.279 | -H   |
| X | PI(18:1,20:4) | PI | 18:1/20:4 | 38:5  | 884.5415 | C47 H81 O13 N0 P1 | 10.066 | -H   |
| * | PI(18:1,20:4) | PI | 18:1/20:4 | 38:5  | 884.5415 | C47 H81 O13 N0 P1 | 10.34  | -H   |
| * | PI(18:1,22:5) | PI | 18:1/22:5 | 40:6  | 910.5571 | C49 H83 O13 N0 P1 | 10.89  | +NH4 |
| * | PI(18:2,20:4) | PI | 18:2/20:4 | 38:6  | 882.5258 | C47 H79 O13 N0 P1 | 9.005  | -H   |
| * | PI(19:0,20:4) | PI | 19:0/20:4 | 39:4  | 900.5728 | C48 H85 O13 N0 P1 | 12.33  | -H   |
| * | PI(20:0,20:4) | PI | 20:0/20:4 | 40:4  | 914.5884 | C49 H87 O13 N0 P1 | 13.096 | -H   |
| * | PI(20:1,22:5) | PI | 20:1/22:5 | 42:6  | 938.5884 | C51 H87 O13 N0 P1 | 12.458 | +NH4 |
| * | PS(10:0e,8:0) | PS | 10:0e/8:0 | 18:0e | 525.3067 | C24 H48 O9 N1 P1  | 3.282  | +H   |
| * | PS(16:0,18:1) | PS | 16:0/18:1 | 34:1  | 761.5207 | C40 H76 O10 N1 P1 | 11.464 | -H   |
| X | PS(16:0,18:2) | PS | 16:0/18:2 | 34:2  | 759.505  | C40 H74 O10 N1 P1 | 10.305 | +H   |
| X | PS(16:0,20:4) | PS | 16:0/20:4 | 36:4  | 783.505  | C42 H74 O10 N1 P1 | 10.134 | +H   |
| X | PS(16:0,22:6) | PS | 16:0/22:6 | 38:6  | 807.505  | C44 H74 O10 N1 P1 | 9.78   | +H   |
| X | PS(17:0,20:4) | PS | 17:0/20:4 | 37:4  | 797.5207 | C43 H76 O10 N1 P1 | 10.902 | +H   |
| X | PS(17:0,22:6) | PS | 17:0/22:6 | 39:6  | 821.5207 | C45 H76 O10 N1 P1 | 10.567 | +H   |
| X | PS(18:0,18:1) | PS | 18:0/18:1 | 36:1  | 789.552  | C42 H80 O10 N1 P1 | 13.023 | -H   |

|   |                |    |            |       |          |                   |        |    |
|---|----------------|----|------------|-------|----------|-------------------|--------|----|
| X | PS(18:0,18:2)  | PS | 18:0/18:2  | 36:2  | 787.5363 | C42 H78 O10 N1 P1 | 11.879 | +H |
| * | PS(18:0,20:2)  | PS | 18:0/20:2  | 38:2  | 815.5676 | C44 H82 O10 N1 P1 | 13.226 | -H |
| * | PS(18:0,20:3)  | PS | 18:0/20:3  | 38:3  | 813.552  | C44 H80 O10 N1 P1 | 12.291 | +H |
| * | PS(18:0,20:3)  | PS | 18:0/20:3  | 38:3  | 813.552  | C44 H80 O10 N1 P1 | 12.475 | -H |
| * | PS(18:0,20:4)  | PS | 18:0/20:4  | 38:4  | 811.5363 | C44 H78 O10 N1 P1 | 11.435 | +H |
| X | PS(18:0,20:4)  | PS | 18:0/20:4  | 38:4  | 811.5363 | C44 H78 O10 N1 P1 | 11.674 | +H |
| X | PS(18:0,20:5)  | PS | 18:0/20:5  | 38:5  | 809.5207 | C44 H76 O10 N1 P1 | 10.753 | -H |
| * | PS(18:0,20:5)  | PS | 18:0/20:5  | 38:5  | 809.5207 | C44 H76 O10 N1 P1 | 11.834 | -H |
| X | PS(18:0,22:4)  | PS | 18:0/22:4  | 40:4  | 839.5676 | C46 H82 O10 N1 P1 | 12.713 | +H |
| * | PS(18:0,22:4)  | PS | 18:0/22:4  | 40:4  | 839.5676 | C46 H82 O10 N1 P1 | 13.007 | +H |
| X | PS(18:0,22:5)  | PS | 18:0/22:5  | 40:5  | 837.552  | C46 H80 O10 N1 P1 | 11.764 | +H |
| * | PS(18:0,22:5)  | PS | 18:0/22:5  | 40:5  | 837.552  | C46 H80 O10 N1 P1 | 12.297 | -H |
| * | PS(18:0,22:6)  | PS | 18:0/22:6  | 40:6  | 835.5363 | C46 H78 O10 N1 P1 | 11.085 | +H |
| X | PS(18:0,22:6)  | PS | 18:0/22:6  | 40:6  | 835.5363 | C46 H78 O10 N1 P1 | 11.324 | +H |
| * | PS(18:1,18:1)  | PS | 18:1/18:1  | 36:2  | 787.5363 | C42 H78 O10 N1 P1 | 11.623 | -H |
| * | PS(18:1,18:2)  | PS | 18:1/18:2  | 36:3  | 785.5207 | C42 H76 O10 N1 P1 | 10.445 | -H |
| X | PS(18:1,20:4)  | PS | 18:1/20:4  | 38:5  | 809.5207 | C44 H76 O10 N1 P1 | 10.22  | +H |
| * | PS(18:1,22:6)  | PS | 18:1/22:6  | 40:7  | 833.5207 | C46 H76 O10 N1 P1 | 9.865  | +H |
| X | PS(18:2,18:2)  | PS | 18:2/18:2  | 36:4  | 783.505  | C42 H74 O10 N1 P1 | 11.396 | -H |
| X | PS(18:2,20:4)  | PS | 18:2/20:4  | 38:6  | 807.505  | C44 H74 O10 N1 P1 | 9.086  | +H |
| * | PS(19:0,20:4)  | PS | 19:0/20:4  | 39:4  | 825.552  | C45 H80 O10 N1 P1 | 12.176 | +H |
| X | PS(19:0,20:4)  | PS | 19:0/20:4  | 39:4  | 825.552  | C45 H80 O10 N1 P1 | 12.502 | +H |
| * | PS(20:0,20:4)  | PS | 20:0/20:4  | 40:4  | 839.5676 | C46 H82 O10 N1 P1 | 13.277 | +H |
| * | PS(20:3,20:4)  | PS | 20:3/20:4  | 40:7  | 833.5207 | C46 H76 O10 N1 P1 | 11.653 | -H |
| X | PS(20:4,20:4)  | PS | 20:4/20:4  | 40:8  | 831.505  | C46 H74 O10 N1 P1 | 8.871  | +H |
| * | PS(20:4,22:6)  | PS | 20:4/22:6  | 42:10 | 855.505  | C48 H74 O10 N1 P1 | 8.545  | +H |
| X | SM(d18:1/16:0) | SM | d18:1/16:0 | d34:1 | 702.5676 | C39 H79 O6 N2 P1  | 10.461 | +H |
| X | SM(d18:1/16:0) | SM | d18:1/16:0 | d34:1 | 702.5676 | C39 H79 O6 N2 P1  | 10.461 | +H |
| X | SM(d18:1/18:0) | SM | d18:1/18:0 | d36:1 | 730.5989 | C41 H83 O6 N2 P1  | 12.138 | +H |
| X | SM(d18:1/18:0) | SM | d18:1/18:0 | d36:1 | 730.5989 | C41 H83 O6 N2 P1  | 12.138 | +H |

|   |                |    |            |       |          |                  |        |    |
|---|----------------|----|------------|-------|----------|------------------|--------|----|
| X | SM(d18:1/18:1) | SM | d18:1/18:1 | d36:2 | 728.5832 | C41 H81 O6 N2 P1 | 10.767 | +H |
| X | SM(d18:1/18:1) | SM | d18:1/18:1 | d36:2 | 728.5832 | C41 H81 O6 N2 P1 | 10.767 | +H |
| X | SM(d18:1/24:1) | SM | d18:1/24:1 | d42:2 | 812.6771 | C47 H93 O6 N2 P1 | 15.145 | +H |
| X | SM(d18:1/26:1) | SM | d18:1/26:1 | d44:2 | 840.7084 | C49 H97 O6 N2 P1 | 16.468 | +H |
| X | SM(d32:1)      | SM | d32:1      | d32:1 | 674.5363 | C37 H75 O6 N2 P1 | 8.814  | +H |
| X | SM(d33:1)      | SM | d33:1      | d33:1 | 688.5519 | C38 H77 O6 N2 P1 | 9.597  | +H |
| X | SM(d34:0)      | SM | d34:0      | d34:0 | 704.5832 | C39 H81 O6 N2 P1 | 11.019 | +H |
| X | SM(d34:1)      | SM | d34:1      | d34:1 | 702.5676 | C39 H79 O6 N2 P1 | 10.384 | +H |
| * | SM(d34:1)      | SM | d34:1      | d34:1 | 702.5676 | C39 H79 O6 N2 P1 | 10.153 | +H |
| X | SM(d34:1)      | SM | d34:1      | d34:1 | 702.5676 | C39 H79 O6 N2 P1 | 11.337 | +H |
| X | SM(d34:2)      | SM | d34:2      | d34:2 | 700.5519 | C39 H77 O6 N2 P1 | 9.07   | +H |
| X | SM(d34:2)      | SM | d34:2      | d34:2 | 700.5519 | C39 H77 O6 N2 P1 | 9.281  | +H |
| X | SM(d35:1)      | SM | d35:1      | d35:1 | 716.5832 | C40 H81 O6 N2 P1 | 11.225 | +H |
| * | SM(d35:1)      | SM | d35:1      | d35:1 | 716.5832 | C40 H81 O6 N2 P1 | 10.965 | +H |
| * | SM(d35:2)      | SM | d35:2      | d35:2 | 714.5676 | C40 H79 O6 N2 P1 | 9.888  | +H |
| * | SM(d35:4)      | SM | d35:4      | d35:4 | 710.5363 | C40 H75 O6 N2 P1 | 9.6    | +H |
| X | SM(d36:1)      | SM | d36:1      | d36:1 | 730.5989 | C41 H83 O6 N2 P1 | 12.047 | +H |
| X | SM(d36:1)      | SM | d36:1      | d36:1 | 730.5989 | C41 H83 O6 N2 P1 | 11.79  | +H |
| X | SM(d36:2)      | SM | d36:2      | d36:2 | 728.5832 | C41 H81 O6 N2 P1 | 10.702 | +H |
| X | SM(d36:2)      | SM | d36:2      | d36:2 | 728.5832 | C41 H81 O6 N2 P1 | 10.924 | +H |
| * | SM(d36:3)      | SM | d36:3      | d36:3 | 726.5676 | C41 H79 O6 N2 P1 | 9.457  | +H |
| * | SM(d36:4)      | SM | d36:4      | d36:4 | 724.5519 | C41 H77 O6 N2 P1 | 10.391 | +H |
| * | SM(d36:5)      | SM | d36:5      | d36:5 | 722.5363 | C41 H75 O6 N2 P1 | 9.071  | +H |
| X | SM(d37:1)      | SM | d37:1      | d37:1 | 744.6145 | C42 H85 O6 N2 P1 | 12.878 | +H |
| * | SM(d37:4)      | SM | d37:4      | d37:4 | 738.5676 | C42 H79 O6 N2 P1 | 11.205 | +H |
| X | SM(d38:1)      | SM | d38:1      | d38:1 | 758.6302 | C43 H87 O6 N2 P1 | 13.681 | +H |
| X | SM(d38:1)      | SM | d38:1      | d38:1 | 758.6302 | C43 H87 O6 N2 P1 | 13.418 | +H |
| * | SM(d38:2)      | SM | d38:2      | d38:2 | 756.6145 | C43 H85 O6 N2 P1 | 12.395 | +H |
| * | SM(d38:3)      | SM | d38:3      | d38:3 | 754.5989 | C43 H83 O6 N2 P1 | 10.838 | +H |
| X | SM(d39:1)      | SM | d39:1      | d39:1 | 772.6458 | C44 H89 O6 N2 P1 | 14.492 | +H |

|   |           |    |       |       |          |                  |        |       |
|---|-----------|----|-------|-------|----------|------------------|--------|-------|
| * | SM(d39:1) | SM | d39:1 | d39:1 | 772.6458 | C44 H89 O6 N2 P1 | 14.144 | +H    |
| * | SM(d39:2) | SM | d39:2 | d39:2 | 770.6302 | C44 H87 O6 N2 P1 | 12.857 | +H    |
| * | SM(d39:2) | SM | d39:2 | d39:2 | 770.6302 | C44 H87 O6 N2 P1 | 13.216 | +H    |
| X | SM(d40:1) | SM | d40:1 | d40:1 | 786.6615 | C45 H91 O6 N2 P1 | 15.237 | +H    |
| X | SM(d40:1) | SM | d40:1 | d40:1 | 786.6615 | C45 H91 O6 N2 P1 | 14.989 | +H    |
| X | SM(d40:2) | SM | d40:2 | d40:2 | 784.6458 | C45 H89 O6 N2 P1 | 13.59  | +H    |
| X | SM(d40:2) | SM | d40:2 | d40:2 | 784.6458 | C45 H89 O6 N2 P1 | 14.027 | +H    |
| * | SM(d40:3) | SM | d40:3 | d40:3 | 782.6302 | C45 H87 O6 N2 P1 | 12.313 | +H    |
| * | SM(d40:4) | SM | d40:4 | d40:4 | 780.6145 | C45 H85 O6 N2 P1 | 13.675 | +H    |
| * | SM(d40:4) | SM | d40:4 | d40:4 | 780.6145 | C45 H85 O6 N2 P1 | 11.227 | +H    |
| X | SM(d41:1) | SM | d41:1 | d41:1 | 800.6771 | C46 H93 O6 N2 P1 | 15.949 | +H    |
| X | SM(d41:1) | SM | d41:1 | d41:1 | 800.6771 | C46 H93 O6 N2 P1 | 15.706 | +H    |
| X | SM(d41:2) | SM | d41:2 | d41:2 | 798.6615 | C46 H91 O6 N2 P1 | 14.34  | +H    |
| X | SM(d41:2) | SM | d41:2 | d41:2 | 798.6615 | C46 H91 O6 N2 P1 | 14.809 | +H    |
| * | SM(d41:3) | SM | d41:3 | d41:3 | 796.6458 | C46 H89 O6 N2 P1 | 13.078 | +H    |
| X | SM(d42:1) | SM | d42:1 | d42:1 | 814.6928 | C47 H95 O6 N2 P1 | 16.545 | +H    |
| X | SM(d42:1) | SM | d42:1 | d42:1 | 814.6928 | C47 H95 O6 N2 P1 | 16.335 | +HCOO |
| * | SM(d42:1) | SM | d42:1 | d42:1 | 814.6928 | C47 H95 O6 N2 P1 | 16.136 | +H    |
| X | SM(d42:1) | SM | d42:1 | d42:1 | 814.6928 | C47 H95 O6 N2 P1 | 25.449 | +H    |
| X | SM(d42:2) | SM | d42:2 | d42:2 | 812.6771 | C47 H93 O6 N2 P1 | 15.044 | +H    |
| X | SM(d42:3) | SM | d42:3 | d42:3 | 810.6615 | C47 H91 O6 N2 P1 | 13.806 | +H    |
| * | SM(d42:4) | SM | d42:4 | d42:4 | 808.6458 | C47 H89 O6 N2 P1 | 15.236 | +H    |
| * | SM(d42:4) | SM | d42:4 | d42:4 | 808.6458 | C47 H89 O6 N2 P1 | 12.737 | +H    |
| * | SM(d42:4) | SM | d42:4 | d42:4 | 808.6458 | C47 H89 O6 N2 P1 | 12.54  | +H    |
| * | SM(d42:5) | SM | d42:5 | d42:5 | 806.6302 | C47 H87 O6 N2 P1 | 13.591 | +H    |
| * | SM(d42:5) | SM | d42:5 | d42:5 | 806.6302 | C47 H87 O6 N2 P1 | 14.021 | +H    |
| X | SM(d43:1) | SM | d43:1 | d43:1 | 828.7084 | C48 H97 O6 N2 P1 | 16.861 | +H    |
| X | SM(d43:1) | SM | d43:1 | d43:1 | 828.7084 | C48 H97 O6 N2 P1 | 17.087 | +H    |
| X | SM(d43:2) | SM | d43:2 | d43:2 | 826.6928 | C48 H95 O6 N2 P1 | 15.749 | +H    |
| * | SM(d43:4) | SM | d43:4 | d43:4 | 822.6615 | C48 H91 O6 N2 P1 | 15.95  | +H    |

|   |                    |    |                |       |          |                  |        |      |
|---|--------------------|----|----------------|-------|----------|------------------|--------|------|
| X | SM(d44:1)          | SM | d44:1          | d44:1 | 842.7241 | C49 H99 O6 N2 P1 | 17.55  | +H   |
| * | SM(d44:4)          | SM | d44:4          | d44:4 | 836.6771 | C49 H93 O6 N2 P1 | 16.339 | +H   |
| * | SM(d44:5)          | SM | d44:5          | d44:5 | 834.6615 | C49 H91 O6 N2 P1 | 15.039 | +H   |
| * | SM(d44:5)          | SM | d44:5          | d44:5 | 834.6615 | C49 H91 O6 N2 P1 | 15.55  | +H   |
| * | So(d18:0)          | So | d18:0          | d18:0 | 301.2981 | C18 H39 O2 N1    | 2.104  | +H   |
| * | So(d18:1)          | So | d18:1          | d18:1 | 299.2824 | C18 H37 O2 N1    | 1.887  | +H   |
| * | TG(10:0,12:0,14:0) | TG | 10:0/12:0/14:0 | 36:0  | 638.5485 | C39 H74 O6       | 16.304 | +NH4 |
| * | TG(10:0,18:1,22:6) | TG | 10:0/18:1/22:6 | 50:7  | 820.6581 | C53 H88 O6       | 18.006 | +NH4 |
| X | TG(10:0,18:2,18:2) | TG | 10:0/18:2/18:2 | 46:4  | 770.6424 | C49 H86 O6       | 17.74  | +NH4 |
| X | TG(10:0,18:2,18:3) | TG | 10:0/18:2/18:3 | 46:5  | 768.6268 | C49 H84 O6       | 17.105 | +NH4 |
| X | TG(10:0,18:2,20:4) | TG | 10:0/18:2/20:4 | 48:6  | 794.6424 | C51 H86 O6       | 17.351 | +NH4 |
| * | TG(11:0,16:0,22:6) | TG | 11:0/16:0/22:6 | 49:6  | 808.6581 | C52 H88 O6       | 16.868 | +H   |
| * | TG(12:0,12:0,14:0) | TG | 12:0/12:0/14:0 | 38:0  | 666.5798 | C41 H78 O6       | 17.321 | +NH4 |
| * | TG(12:0,14:0,14:1) | TG | 12:0/14:0/14:1 | 40:1  | 692.5955 | C43 H80 O6       | 17.465 | +NH4 |
| X | TG(12:0,18:2,18:2) | TG | 12:0/18:2/18:2 | 48:4  | 798.6737 | C51 H90 O6       | 18.432 | +NH4 |
| * | TG(12:0,18:2,18:3) | TG | 12:0/18:2/18:3 | 48:5  | 796.6581 | C51 H88 O6       | 17.922 | +NH4 |
| X | TG(12:0,18:2,22:6) | TG | 12:0/18:2/22:6 | 52:8  | 846.6737 | C55 H90 O6       | 18.237 | +NH4 |
| * | TG(12:0,18:3,18:3) | TG | 12:0/18:3/18:3 | 48:6  | 794.6424 | C51 H86 O6       | 17.413 | +NH4 |
| * | TG(14:0,14:1,18:3) | TG | 14:0/14:1/18:3 | 46:4  | 770.6424 | C49 H86 O6       | 18.091 | +NH4 |
| X | TG(14:0,18:2,18:3) | TG | 14:0/18:2/18:3 | 50:5  | 824.6894 | C53 H92 O6       | 18.633 | +H   |
| * | TG(14:0,18:2,20:5) | TG | 14:0/18:2/20:5 | 52:7  | 848.6894 | C55 H92 O6       | 18.41  | +H   |
| * | TG(14:0,18:3,18:3) | TG | 14:0/18:3/18:3 | 50:6  | 822.6737 | C53 H90 O6       | 18.179 | +NH4 |
| * | TG(14:0,18:3,18:3) | TG | 14:0/18:3/18:3 | 50:6  | 822.6737 | C53 H90 O6       | 16.265 | +H   |
| * | TG(15:0,12:0,16:1) | TG | 15:0/12:0/16:1 | 43:1  | 734.6424 | C46 H86 O6       | 18.473 | +NH4 |
| * | TG(15:0,13:0,16:0) | TG | 15:0/13:0/16:0 | 44:0  | 750.6737 | C47 H90 O6       | 19.335 | +NH4 |
| * | TG(15:0,13:0,16:1) | TG | 15:0/13:0/16:1 | 44:1  | 748.6581 | C47 H88 O6       | 18.673 | +NH4 |
| X | TG(15:0,14:0,16:0) | TG | 15:0/14:0/16:0 | 45:0  | 764.6894 | C48 H92 O6       | 19.729 | +NH4 |
| * | TG(15:0,14:1,16:1) | TG | 15:0/14:1/16:1 | 45:2  | 760.6581 | C48 H88 O6       | 18.561 | +NH4 |
| X | TG(15:0,14:1,18:2) | TG | 15:0/14:1/18:2 | 47:3  | 786.6737 | C50 H90 O6       | 18.689 | +NH4 |
| * | TG(15:0,15:0,16:0) | TG | 15:0/15:0/16:0 | 46:0  | 778.705  | C49 H94 O6       | 19.869 | +NH4 |

|   |                    |    |                |      |          |             |        |      |
|---|--------------------|----|----------------|------|----------|-------------|--------|------|
| * | TG(15:0,15:0,16:0) | TG | 15:0/15:0/16:0 | 46:0 | 778.705  | C49 H94 O6  | 19.743 | +NH4 |
| * | TG(15:0,16:0,16:0) | TG | 15:0/16:0/16:0 | 47:0 | 792.7207 | C50 H96 O6  | 20.574 | +NH4 |
| * | TG(15:0,16:0,16:0) | TG | 15:0/16:0/16:0 | 47:0 | 792.7207 | C50 H96 O6  | 20.218 | +NH4 |
| * | TG(15:0,16:0,16:1) | TG | 15:0/16:0/16:1 | 47:1 | 790.705  | C50 H94 O6  | 20.284 | +NH4 |
| X | TG(15:0,16:0,16:1) | TG | 15:0/16:0/16:1 | 47:1 | 790.705  | C50 H94 O6  | 19.727 | +NH4 |
| X | TG(15:0,16:0,18:1) | TG | 15:0/16:0/18:1 | 49:1 | 818.7363 | C52 H98 O6  | 20.2   | +NH4 |
| X | TG(15:0,16:0,18:2) | TG | 15:0/16:0/18:2 | 49:2 | 816.7207 | C52 H96 O6  | 19.808 | +NH4 |
| * | TG(15:0,16:1,16:1) | TG | 15:0/16:1/16:1 | 47:2 | 788.6894 | C50 H92 O6  | 19.187 | +NH4 |
| * | TG(15:0,16:1,18:1) | TG | 15:0/16:1/18:1 | 49:2 | 816.7207 | C52 H96 O6  | 20.419 | +NH4 |
| * | TG(15:0,16:1,18:2) | TG | 15:0/16:1/18:2 | 49:3 | 814.705  | C52 H94 O6  | 19.517 | +NH4 |
| X | TG(15:0,16:1,18:2) | TG | 15:0/16:1/18:2 | 49:3 | 814.705  | C52 H94 O6  | 19.302 | +NH4 |
| * | TG(15:0,16:1,18:2) | TG | 15:0/16:1/18:2 | 49:3 | 814.705  | C52 H94 O6  | 19.28  | +NH4 |
| * | TG(15:0,16:1,24:0) | TG | 15:0/16:1/24:0 | 55:1 | 902.8302 | C58 H110 O6 | 21.422 | +NH4 |
| * | TG(15:0,18:1,18:2) | TG | 15:0/18:1/18:2 | 51:3 | 842.7363 | C54 H98 O6  | 19.777 | +NH4 |
| * | TG(15:0,18:1,18:3) | TG | 15:0/18:1/18:3 | 51:4 | 840.7207 | C54 H96 O6  | 19.342 | +NH4 |
| * | TG(15:0,18:1,18:3) | TG | 15:0/18:1/18:3 | 51:4 | 840.7207 | C54 H96 O6  | 17.391 | +H   |
| X | TG(15:0,18:2,18:2) | TG | 15:0/18:2/18:2 | 51:4 | 840.7207 | C54 H96 O6  | 19.356 | +NH4 |
| * | TG(15:0,18:2,18:3) | TG | 15:0/18:2/18:3 | 51:5 | 838.705  | C54 H94 O6  | 19.231 | +NH4 |
| X | TG(15:0,18:2,18:3) | TG | 15:0/18:2/18:3 | 51:5 | 838.705  | C54 H94 O6  | 18.872 | +H   |
| * | TG(15:0,18:2,20:5) | TG | 15:0/18:2/20:5 | 53:7 | 862.705  | C56 H94 O6  | 19.436 | +NH4 |
| * | TG(15:0,18:2,22:6) | TG | 15:0/18:2/22:6 | 55:8 | 888.7207 | C58 H96 O6  | 19.454 | +NH4 |
| X | TG(15:1,14:0,16:1) | TG | 15:1/14:0/16:1 | 45:2 | 760.6581 | C48 H88 O6  | 18.68  | +NH4 |
| X | TG(15:1,16:1,18:2) | TG | 15:1/16:1/18:2 | 49:4 | 812.6894 | C52 H92 O6  | 18.804 | +NH4 |
| X | TG(15:1,18:2,18:2) | TG | 15:1/18:2/18:2 | 51:5 | 838.705  | C54 H94 O6  | 18.811 | +NH4 |
| X | TG(15:1,18:2,18:3) | TG | 15:1/18:2/18:3 | 51:6 | 836.6894 | C54 H92 O6  | 18.357 | +NH4 |
| X | TG(16:0,8:0,18:1)  | TG | 16:0/8:0/18:1  | 42:1 | 720.6268 | C45 H84 O6  | 18.301 | +NH4 |
| X | TG(16:0,10:0,18:1) | TG | 16:0/10:0/18:1 | 44:1 | 748.6581 | C47 H88 O6  | 18.919 | +NH4 |
| * | TG(16:0,12:0,12:0) | TG | 16:0/12:0/12:0 | 40:0 | 694.6111 | C43 H82 O6  | 18.173 | +NH4 |
| * | TG(16:0,12:0,14:0) | TG | 16:0/12:0/14:0 | 42:0 | 722.6424 | C45 H86 O6  | 18.859 | +NH4 |
| * | TG(16:0,12:0,22:6) | TG | 16:0/12:0/22:6 | 50:6 | 822.6737 | C53 H90 O6  | 18.446 | +NH4 |



|   |                    |    |                |      |          |             |        |      |
|---|--------------------|----|----------------|------|----------|-------------|--------|------|
| * | TG(16:0,13:0,14:0) | TG | 16:0/13:0/14:0 | 43:0 | 736.6581 | C46 H88 O6  | 19.015 | +NH4 |
| X | TG(16:0,14:0,14:0) | TG | 16:0/14:0/14:0 | 44:0 | 750.6737 | C47 H90 O6  | 19.491 | +NH4 |
| * | TG(16:0,14:0,14:1) | TG | 16:0/14:0/14:1 | 44:1 | 748.6581 | C47 H88 O6  | 23.336 | +NH4 |
| * | TG(16:0,14:0,14:1) | TG | 16:0/14:0/14:1 | 44:1 | 748.6581 | C47 H88 O6  | 22.572 | +NH4 |
| * | TG(16:0,14:0,16:0) | TG | 16:0/14:0/16:0 | 46:0 | 778.705  | C49 H94 O6  | 20.269 | +NH4 |
| X | TG(16:0,14:0,16:0) | TG | 16:0/14:0/16:0 | 46:0 | 778.705  | C49 H94 O6  | 20.14  | +NH4 |
| X | TG(16:0,14:0,16:1) | TG | 16:0/14:0/16:1 | 46:1 | 776.6894 | C49 H92 O6  | 19.208 | +NH4 |
| X | TG(16:0,14:0,18:1) | TG | 16:0/14:0/18:1 | 48:1 | 804.7207 | C51 H96 O6  | 19.954 | +NH4 |
| * | TG(16:0,14:0,20:4) | TG | 16:0/14:0/20:4 | 50:4 | 826.705  | C53 H94 O6  | 19.357 | +NH4 |
| * | TG(16:0,14:0,22:6) | TG | 16:0/14:0/22:6 | 52:6 | 850.705  | C55 H94 O6  | 18.851 | +NH4 |
| * | TG(16:0,14:1,16:1) | TG | 16:0/14:1/16:1 | 46:2 | 774.6737 | C49 H90 O6  | 21.379 | +NH4 |
| X | TG(16:0,16:0,16:0) | TG | 16:0/16:0/16:0 | 48:0 | 806.7363 | C51 H98 O6  | 20.447 | +NH4 |
| * | TG(16:0,16:0,16:0) | TG | 16:0/16:0/16:0 | 48:0 | 806.7363 | C51 H98 O6  | 20.324 | +NH4 |
| * | TG(16:0,16:0,16:1) | TG | 16:0/16:0/16:1 | 48:1 | 804.7207 | C51 H96 O6  | 19.954 | +NH4 |
| * | TG(16:0,16:0,17:0) | TG | 16:0/16:0/17:0 | 49:0 | 820.752  | C52 H100 O6 | 20.557 | +NH4 |
| * | TG(16:0,16:0,18:1) | TG | 16:0/16:0/18:1 | 50:1 | 832.752  | C53 H100 O6 | 20.42  | +NH4 |
| X | TG(16:0,16:0,18:2) | TG | 16:0/16:0/18:2 | 50:2 | 830.7363 | C53 H98 O6  | 20.068 | +NH4 |
| * | TG(16:0,16:0,18:3) | TG | 16:0/16:0/18:3 | 50:3 | 828.7207 | C53 H96 O6  | 17.934 | +H   |
| X | TG(16:0,16:0,18:3) | TG | 16:0/16:0/18:3 | 50:3 | 828.7207 | C53 H96 O6  | 19.766 | +H   |
| * | TG(16:0,16:0,20:3) | TG | 16:0/16:0/20:3 | 52:3 | 856.752  | C55 H100 O6 | 18.44  | +H   |
| * | TG(16:0,16:0,20:4) | TG | 16:0/16:0/20:4 | 52:4 | 854.7363 | C55 H98 O6  | 19.897 | +NH4 |
| * | TG(16:0,16:0,20:5) | TG | 16:0/16:0/20:5 | 52:5 | 852.7207 | C55 H96 O6  | 20.634 | +H   |
| * | TG(16:0,16:0,20:5) | TG | 16:0/16:0/20:5 | 52:5 | 852.7207 | C55 H96 O6  | 19.533 | +NH4 |
| * | TG(16:0,16:0,22:0) | TG | 16:0/16:0/22:0 | 54:0 | 890.8302 | C57 H110 O6 | 21.613 | +NH4 |
| X | TG(16:0,16:0,22:6) | TG | 16:0/16:0/22:6 | 54:6 | 878.7363 | C57 H98 O6  | 19.722 | +NH4 |
| * | TG(16:0,16:1,16:1) | TG | 16:0/16:1/16:1 | 48:2 | 802.705  | C51 H94 O6  | 20.282 | +NH4 |
| * | TG(16:0,16:1,16:1) | TG | 16:0/16:1/16:1 | 48:2 | 802.705  | C51 H94 O6  | 19.532 | +NH4 |
| * | TG(16:0,16:1,18:1) | TG | 16:0/16:1/18:1 | 50:2 | 830.7363 | C53 H98 O6  | 20.044 | +NH4 |
| X | TG(16:0,16:1,18:2) | TG | 16:0/16:1/18:2 | 50:3 | 828.7207 | C53 H96 O6  | 19.516 | +NH4 |
| * | TG(16:0,16:1,18:3) | TG | 16:0/16:1/18:3 | 50:4 | 826.705  | C53 H94 O6  | 17.234 | +H   |

|   |                     |    |                 |       |          |             |        |      |
|---|---------------------|----|-----------------|-------|----------|-------------|--------|------|
| * | TG(16:0,16:1,18:3)  | TG | 16:0/16:1/18:3  | 50:4  | 826.705  | C53 H94 O6  | 17.062 | +H   |
| * | TG(16:0,16:1,20:5)  | TG | 16:0/16:1/20:5  | 52:6  | 850.705  | C55 H94 O6  | 17.194 | +H   |
| X | TG(16:0,16:1,24:0)  | TG | 16:0/16:1/24:0  | 56:1  | 916.8459 | C59 H112 O6 | 21.582 | +NH4 |
| X | TG(16:0,17:0,18:1)  | TG | 16:0/17:0/18:1  | 51:1  | 846.7676 | C54 H102 O6 | 20.624 | +NH4 |
| * | TG(16:0,17:0,20:5)  | TG | 16:0/17:0/20:5  | 53:5  | 866.7363 | C56 H98 O6  | 20.119 | +NH4 |
| * | TG(16:0,18:1,18:1)  | TG | 16:0/18:1/18:1  | 52:2  | 858.7676 | C55 H102 O6 | 20.507 | +NH4 |
| X | TG(16:0,18:1,18:1)  | TG | 16:0/18:1/18:1  | 52:2  | 858.7676 | C55 H102 O6 | 20.393 | +NH4 |
| X | TG(16:0,18:1,18:2)  | TG | 16:0/18:1/18:2  | 52:3  | 856.752  | C55 H100 O6 | 20.014 | +NH4 |
| X | TG(16:0,18:1,18:3)  | TG | 16:0/18:1/18:3  | 52:4  | 854.7363 | C55 H98 O6  | 19.618 | +NH4 |
| X | TG(16:0,18:1,19:0)  | TG | 16:0/18:1/19:0  | 53:1  | 874.7989 | C56 H106 O6 | 20.961 | +NH4 |
| X | TG(16:0,18:1,20:4)  | TG | 16:0/18:1/20:4  | 54:5  | 880.752  | C57 H100 O6 | 19.895 | +NH4 |
| * | TG(16:0,18:1,22:5)  | TG | 16:0/18:1/22:5  | 56:6  | 906.7676 | C59 H102 O6 | 17.767 | +H   |
| X | TG(16:0,18:2,18:2)  | TG | 16:0/18:2/18:2  | 52:4  | 854.7363 | C55 H98 O6  | 24.435 | +NH4 |
| X | TG(16:0,18:2,18:2)  | TG | 16:0/18:2/18:2  | 52:4  | 854.7363 | C55 H98 O6  | 22.865 | +NH4 |
| X | TG(16:0,18:2,18:2)  | TG | 16:0/18:2/18:2  | 52:4  | 854.7363 | C55 H98 O6  | 21.249 | +NH4 |
| X | TG(16:0,18:2,18:3)  | TG | 16:0/18:2/18:3  | 52:5  | 852.7207 | C55 H96 O6  | 19.233 | +H   |
| X | TG(16:0,18:2,20:4)  | TG | 16:0/18:2/20:4  | 54:6  | 878.7363 | C57 H98 O6  | 19.437 | +H   |
| * | TG(16:0,18:2,20:5)  | TG | 16:0/18:2/20:5  | 54:7  | 876.7207 | C57 H96 O6  | 19.06  | +H   |
| * | TG(16:0,18:2,22:0)  | TG | 16:0/18:2/22:0  | 56:2  | 914.8302 | C59 H110 O6 | 21.297 | +NH4 |
| * | TG(16:0,18:2,22:4)  | TG | 16:0/18:2/22:4  | 56:6  | 906.7676 | C59 H102 O6 | 19.822 | +NH4 |
| X | TG(16:0,18:2,22:5)  | TG | 16:0/18:2/22:5  | 56:7  | 904.752  | C59 H100 O6 | 19.479 | +NH4 |
| * | TG(16:0,18:2,22:6)  | TG | 16:0/18:2/22:6  | 56:8  | 902.7363 | C59 H98 O6  | 19.258 | +NH4 |
| * | TG(16:0,18:2,22:6)  | TG | 16:0/18:2/22:6  | 56:8  | 902.7363 | C59 H98 O6  | 16.58  | +H   |
| * | TG(16:0,18:2,22:6)  | TG | 16:0/18:2/22:6  | 56:8  | 902.7363 | C59 H98 O6  | 16.328 | +H   |
| * | TG(16:0,18:3,18:3)  | TG | 16:0/18:3/18:3  | 52:6  | 850.705  | C55 H94 O6  | 13.976 | +H   |
| * | TG(16:0,20:2,22:6)  | TG | 16:0/20:2/22:6  | 58:8  | 930.7676 | C61 H102 O6 | 19.686 | +NH4 |
| X | TG(16:0,20:3,22:6)  | TG | 16:0/20:3/22:6  | 58:9  | 928.752  | C61 H100 O6 | 19.254 | +NH4 |
| * | TG(16:0,20:4,24:0)  | TG | 16:0/20:4/24:0  | 60:4  | 966.8615 | C63 H114 O6 | 21.561 | +NH4 |
| * | TG(16:0,22:6,22:6)  | TG | 16:0/22:6/22:6  | 60:2  | 950.7363 | C63 H98 O6  | 18.878 | +NH4 |
| * | TG(16:0e,16:0,18:1) | TG | 16:0e/16:0/18:1 | 50:1e | 818.7727 | C53 H102 O5 | 21.049 | +H   |

|   |                     |    |                 |       |          |             |        |      |
|---|---------------------|----|-----------------|-------|----------|-------------|--------|------|
| X | TG(16:0e,16:0,18:2) | TG | 16:0e/16:0/18:2 | 50:2e | 816.7571 | C53 H100 O5 | 20.711 | +NH4 |
| * | TG(16:0p,18:1,18:1) | TG | 16:0p/18:1/18:1 | 52:2p | 842.7727 | C55 H102 O5 | 20.677 | +NH4 |
| * | TG(16:1,12:0,14:0)  | TG | 16:1/12:0/14:0  | 42:1  | 720.6268 | C45 H84 O6  | 18.284 | +NH4 |
| * | TG(16:1,12:0,14:1)  | TG | 16:1/12:0/14:1  | 42:2  | 718.6111 | C45 H82 O6  | 17.636 | +NH4 |
| X | TG(16:1,12:0,18:1)  | TG | 16:1/12:0/18:1  | 46:2  | 774.6737 | C49 H90 O6  | 18.984 | +NH4 |
| X | TG(16:1,12:0,18:2)  | TG | 16:1/12:0/18:2  | 46:3  | 772.6581 | C49 H88 O6  | 18.346 | +NH4 |
| * | TG(16:1,14:0,14:0)  | TG | 16:1/14:0/14:0  | 44:1  | 748.6581 | C47 H88 O6  | 18.919 | +NH4 |
| * | TG(16:1,14:0,14:1)  | TG | 16:1/14:0/14:1  | 44:2  | 746.6424 | C47 H86 O6  | 18.344 | +NH4 |
| X | TG(16:1,14:0,18:1)  | TG | 16:1/14:0/18:1  | 48:2  | 802.705  | C51 H94 O6  | 19.441 | +NH4 |
| X | TG(16:1,14:0,18:2)  | TG | 16:1/14:0/18:2  | 48:3  | 800.6894 | C51 H92 O6  | 18.998 | +NH4 |
| * | TG(16:1,14:1,18:1)  | TG | 16:1/14:1/18:1  | 48:3  | 800.6894 | C51 H92 O6  | 19.108 | +NH4 |
| * | TG(16:1,14:1,18:2)  | TG | 16:1/14:1/18:2  | 48:4  | 798.6737 | C51 H90 O6  | 18.653 | +NH4 |
| * | TG(16:1,16:1,16:1)  | TG | 16:1/16:1/16:1  | 48:3  | 800.6894 | C51 H92 O6  | 18.835 | +NH4 |
| * | TG(16:1,16:1,18:2)  | TG | 16:1/16:1/18:2  | 50:4  | 826.705  | C53 H94 O6  | 19.027 | +NH4 |
| * | TG(16:1,16:1,18:3)  | TG | 16:1/16:1/18:3  | 50:5  | 824.6894 | C53 H92 O6  | 18.48  | +H   |
| * | TG(16:1,16:1,24:0)  | TG | 16:1/16:1/24:0  | 56:2  | 914.8302 | C59 H110 O6 | 21.185 | +NH4 |
| * | TG(16:1,17:0,18:1)  | TG | 16:1/17:0/18:1  | 51:2  | 844.752  | C54 H100 O6 | 20.067 | +NH4 |
| * | TG(16:1,17:1,18:3)  | TG | 16:1/17:1/18:3  | 51:5  | 838.705  | C54 H94 O6  | 19.62  | +NH4 |
| * | TG(16:1,18:1,18:1)  | TG | 16:1/18:1/18:1  | 52:3  | 856.752  | C55 H100 O6 | 24.892 | +NH4 |
| * | TG(16:1,18:1,24:0)  | TG | 16:1/18:1/24:0  | 58:2  | 942.8615 | C61 H114 O6 | 21.666 | +NH4 |
| X | TG(16:1,18:2,18:2)  | TG | 16:1/18:2/18:2  | 52:5  | 852.7207 | C55 H96 O6  | 19.098 | +NH4 |
| X | TG(16:1,18:2,18:3)  | TG | 16:1/18:2/18:3  | 52:6  | 850.705  | C55 H94 O6  | 18.626 | +NH4 |
| * | TG(16:2,14:0,18:2)  | TG | 16:2/14:0/18:2  | 48:4  | 798.6737 | C51 H90 O6  | 18.421 | +NH4 |
| X | TG(16:2,14:1,18:2)  | TG | 16:2/14:1/18:2  | 48:5  | 796.6581 | C51 H88 O6  | 17.965 | +NH4 |
| X | TG(16:2,18:2,18:3)  | TG | 16:2/18:2/18:3  | 52:7  | 848.6894 | C55 H92 O6  | 18.187 | +NH4 |
| X | TG(16:2,18:3,18:3)  | TG | 16:2/18:3/18:3  | 52:8  | 846.6737 | C55 H90 O6  | 17.656 | +NH4 |
| X | TG(17:0,18:1,18:1)  | TG | 17:0/18:1/18:1  | 53:2  | 872.7833 | C56 H104 O6 | 20.611 | +NH4 |
| * | TG(17:0,18:1,18:2)  | TG | 17:0/18:1/18:2  | 53:3  | 870.7676 | C56 H102 O6 | 20.162 | +NH4 |
| * | TG(17:0,18:1,22:4)  | TG | 17:0/18:1/22:4  | 57:5  | 922.7989 | C60 H106 O6 | 20.417 | +NH4 |
| X | TG(17:0,18:2,18:2)  | TG | 17:0/18:2/18:2  | 53:4  | 868.752  | C56 H100 O6 | 19.77  | +NH4 |

|   |                     |    |                 |       |          |             |        |      |
|---|---------------------|----|-----------------|-------|----------|-------------|--------|------|
| * | TG(18:0,16:0,16:0)  | TG | 18:0/16:0/16:0  | 50:0  | 834.7676 | C53 H102 O6 | 20.869 | +NH4 |
| * | TG(18:0,16:0,16:0)  | TG | 18:0/16:0/16:0  | 50:0  | 834.7676 | C53 H102 O6 | 20.743 | +NH4 |
| * | TG(18:0,16:0,17:0)  | TG | 18:0/16:0/17:0  | 51:0  | 848.7833 | C54 H104 O6 | 20.96  | +NH4 |
| X | TG(18:0,16:0,18:1)  | TG | 18:0/16:0/18:1  | 52:1  | 860.7833 | C55 H104 O6 | 20.844 | +NH4 |
| * | TG(18:0,16:0,18:0)  | TG | 18:0/16:0/18:0  | 52:0  | 862.7989 | C55 H106 O6 | 21.241 | +NH4 |
| * | TG(18:0,16:0,18:0)  | TG | 18:0/16:0/18:0  | 52:0  | 862.7989 | C55 H106 O6 | 20.944 | +NH4 |
| X | TG(18:0,16:0,19:0)  | TG | 18:0/16:0/19:0  | 53:0  | 876.8146 | C56 H108 O6 | 21.423 | +NH4 |
| X | TG(18:0,16:0,20:4)  | TG | 18:0/16:0/20:4  | 54:4  | 882.7676 | C57 H102 O6 | 20.358 | +NH4 |
| X | TG(18:0,17:0,18:2)  | TG | 18:0/17:0/18:2  | 53:2  | 872.7833 | C56 H104 O6 | 20.721 | +NH4 |
| X | TG(18:0,18:0,18:1)  | TG | 18:0/18:0/18:1  | 54:1  | 888.8146 | C57 H108 O6 | 21.226 | +NH4 |
| * | TG(18:0,18:0,18:2)  | TG | 18:0/18:0/18:2  | 54:2  | 886.7989 | C57 H106 O6 | 20.921 | +NH4 |
| * | TG(18:0,18:0,20:3)  | TG | 18:0/18:0/20:3  | 56:3  | 912.8146 | C59 H108 O6 | 20.877 | +NH4 |
| * | TG(18:0,18:0,20:4)  | TG | 18:0/18:0/20:4  | 56:04 | 910.7989 | C59 H106 O6 | 20.797 | +NH4 |
| X | TG(18:0,18:0,22:0)  | TG | 18:0/18:0/22:0  | 58:0  | 946.8928 | C61 H118 O6 | 22.123 | +NH4 |
| * | TG(18:0,18:0,22:6)  | TG | 18:0/18:0/22:6  | 58:6  | 934.7989 | C61 H106 O6 | 20.647 | +NH4 |
| * | TG(18:0,18:1,18:1)  | TG | 18:0/18:1/18:1  | 54:2  | 886.7989 | C57 H106 O6 | 20.801 | +H   |
| X | TG(18:0,18:1,18:2)  | TG | 18:0/18:1/18:2  | 54:3  | 884.7833 | C57 H104 O6 | 20.477 | +NH4 |
| * | TG(18:0,18:1,18:3)  | TG | 18:0/18:1/18:3  | 54:4  | 882.7676 | C57 H102 O6 | 18.419 | +H   |
| X | TG(18:0,18:2,18:3)  | TG | 18:0/18:2/18:3  | 54:5  | 880.752  | C57 H100 O6 | 19.764 | +H   |
| * | TG(18:0,18:2,22:4)  | TG | 18:0/18:2/22:4  | 58:6  | 934.7989 | C61 H106 O6 | 20.289 | +NH4 |
| * | TG(18:0,18:2,22:5)  | TG | 18:0/18:2/22:5  | 58:7  | 932.7833 | C61 H104 O6 | 20.18  | +NH4 |
| * | TG(18:0,18:2,22:5)  | TG | 18:0/18:2/22:5  | 58:7  | 932.7833 | C61 H104 O6 | 19.926 | +NH4 |
| * | TG(18:0,20:0,20:4)  | TG | 18:0/20:0/20:4  | 58:4  | 938.8302 | C61 H110 O6 | 21.191 | +NH4 |
| X | TG(18:0,20:0,22:0)  | TG | 18:0/20:0/22:0  | 60:0  | 974.9241 | C63 H122 O6 | 22.507 | +NH4 |
| X | TG(18:0,20:4,20:4)  | TG | 18:0/20:4/20:4  | 58:8  | 930.7676 | C61 H102 O6 | 19.814 | +NH4 |
| X | TG(18:0,20:4,22:6)  | TG | 18:0/20:4/22:6  | 60:10 | 954.7676 | C63 H102 O6 | 19.659 | +NH4 |
| X | TG(18:0,22:0,22:0)  | TG | 18:0/22:0/22:0  | 62:0  | 1002.955 | C65 H126 O6 | 22.781 | +NH4 |
| X | TG(18:0e,16:0,18:0) | TG | 18:0e/16:0/18:0 | 52:0e | 848.8197 | C55 H108 O5 | 21.821 | +NH4 |
| * | TG(18:0e,16:0,18:1) | TG | 18:0e/16:0/18:1 | 52:1e | 846.804  | C55 H106 O5 | 21.426 | +H   |
| X | TG(18:0e,16:0,22:4) | TG | 18:0e/16:0/22:4 | 56:4e | 896.8197 | C59 H108 O5 | 21.245 | +H   |

|   |                     |    |                 |       |          |             |        |      |
|---|---------------------|----|-----------------|-------|----------|-------------|--------|------|
| * | TG(18:0e,18:1,18:2) | TG | 18:0e/18:1/18:2 | 54:3e | 870.804  | C57 H106 O5 | 21.099 | +NH4 |
| * | TG(18:1,17:1,18:2)  | TG | 18:1/17:1/18:2  | 53:4  | 868.752  | C56 H100 O6 | 20.472 | +NH4 |
| * | TG(18:1,18:1,18:1)  | TG | 18:1/18:1/18:1  | 54:3  | 884.7833 | C57 H104 O6 | 20.374 | +NH4 |
| * | TG(18:1,18:1,18:2)  | TG | 18:1/18:1/18:2  | 54:4  | 882.7676 | C57 H102 O6 | 20.368 | +NH4 |
| * | TG(18:1,18:1,18:2)  | TG | 18:1/18:1/18:2  | 54:4  | 882.7676 | C57 H102 O6 | 20.111 | +NH4 |
| * | TG(18:1,18:1,18:3)  | TG | 18:1/18:1/18:3  | 54:5  | 880.752  | C57 H100 O6 | 17.767 | +H   |
| * | TG(18:1,18:1,20:3)  | TG | 18:1/18:1/20:3  | 56:5  | 908.7833 | C59 H104 O6 | 20.082 | +H   |
| * | TG(18:1,18:2,18:3)  | TG | 18:1/18:2/18:3  | 54:6  | 878.7363 | C57 H98 O6  | 17.37  | +H   |
| * | TG(18:1,18:2,24:0)  | TG | 18:1/18:2/24:0  | 60:3  | 968.8772 | C63 H116 O6 | 21.61  | +NH4 |
| * | TG(18:1,20:4,20:5)  | TG | 18:1/20:4/20:5  | 58:10 | 926.7363 | C61 H98 O6  | 18.87  | +NH4 |
| * | TG(18:1,20:4,22:0)  | TG | 18:1/20:4/22:0  | 60:5  | 964.8459 | C63 H112 O6 | 21.128 | +NH4 |
| * | TG(18:1,22:6,22:6)  | TG | 18:1/22:6/22:6  | 62:13 | 976.752  | C65 H100 O6 | 18.852 | +NH4 |
| * | TG(18:2,14:1,14:1)  | TG | 18:2/14:1/14:1  | 46:4  | 770.6424 | C49 H86 O6  | 17.909 | +NH4 |
| X | TG(18:2,18:2,18:2)  | TG | 18:2/18:2/18:2  | 54:6  | 878.7363 | C57 H98 O6  | 22.291 | +NH4 |
| * | TG(18:2,18:2,18:2)  | TG | 18:2/18:2/18:2  | 54:6  | 878.7363 | C57 H98 O6  | 20.971 | +NH4 |
| * | TG(18:2,18:2,20:4)  | TG | 18:2/18:2/20:4  | 56:8  | 902.7363 | C59 H98 O6  | 16.846 | +H   |
| * | TG(18:2,22:6,22:6)  | TG | 18:2/22:6/22:6  | 62:14 | 974.7363 | C65 H98 O6  | 18.337 | +NH4 |
| X | TG(18:2p,16:0,18:2) | TG | 18:2p/16:0/18:2 | 52:4p | 838.7414 | C55 H98 O5  | 20.035 | +H   |
| X | TG(18:2p,16:0,18:3) | TG | 18:2p/16:0/18:3 | 52:5p | 836.7258 | C55 H96 O5  | 19.607 | +H   |
| * | TG(18:3,13:0,18:2)  | TG | 18:3/13:0/18:2  | 49:5  | 810.6737 | C52 H90 O6  | 18.3   | +NH4 |
| X | TG(18:3,14:1,18:2)  | TG | 18:3/14:1/18:2  | 50:6  | 822.6737 | C53 H90 O6  | 18.103 | +NH4 |
| X | TG(18:3,14:1,18:3)  | TG | 18:3/14:1/18:3  | 50:7  | 820.6581 | C53 H88 O6  | 17.561 | +NH4 |
| X | TG(18:3,17:1,18:2)  | TG | 18:3/17:1/18:2  | 53:6  | 864.7207 | C56 H96 O6  | 18.902 | +NH4 |
| X | TG(18:3,18:2,18:2)  | TG | 18:3/18:2/18:2  | 54:7  | 876.7207 | C57 H96 O6  | 18.714 | +H   |
| X | TG(18:3,18:2,18:3)  | TG | 18:3/18:2/18:3  | 54:8  | 874.705  | C57 H94 O6  | 18.288 | +NH4 |
| X | TG(18:3,18:2,20:5)  | TG | 18:3/18:2/20:5  | 56:10 | 898.705  | C59 H94 O6  | 18.078 | +NH4 |
| * | TG(18:3,18:2,22:4)  | TG | 18:3/18:2/22:4  | 58:9  | 928.752  | C61 H100 O6 | 16.53  | +H   |
| X | TG(18:3,18:3,20:5)  | TG | 18:3/18:3/20:5  | 56:11 | 896.6894 | C59 H92 O6  | 17.603 | +NH4 |
| X | TG(18:3,18:3,22:6)  | TG | 18:3/18:3/22:6  | 58:12 | 922.705  | C61 H94 O6  | 17.851 | +NH4 |
| X | TG(18:3,20:5,20:5)  | TG | 18:3/20:5/20:5  | 58:13 | 920.6894 | C61 H92 O6  | 17.3   | +NH4 |

|   |                     |    |                 |       |          |             |        |      |
|---|---------------------|----|-----------------|-------|----------|-------------|--------|------|
| X | TG(18:3,20:5,22:6)  | TG | 18:3/20:5/22:6  | 60:14 | 946.705  | C63 H94 O6  | 17.599 | +NH4 |
| * | TG(18:4,14:0,16:0)  | TG | 18:4/14:0/16:0  | 48:4  | 798.6737 | C51 H90 O6  | 18.775 | +NH4 |
| * | TG(18:4,15:0,18:1)  | TG | 18:4/15:0/18:1  | 51:5  | 838.705  | C54 H94 O6  | 17.788 | +NH4 |
| * | TG(18:4,16:0,16:0)  | TG | 18:4/16:0/16:0  | 50:4  | 826.705  | C53 H94 O6  | 17.783 | +H   |
| * | TG(18:4,16:0,16:1)  | TG | 18:4/16:0/16:1  | 50:5  | 824.6894 | C53 H92 O6  | 18.881 | +NH4 |
| * | TG(18:4,16:0,16:1)  | TG | 18:4/16:0/16:1  | 50:5  | 824.6894 | C53 H92 O6  | 17.03  | +H   |
| * | TG(18:4,16:0,18:2)  | TG | 18:4/16:0/18:2  | 52:6  | 850.705  | C55 H94 O6  | 16.83  | +H   |
| X | TG(18:4,16:0,20:5)  | TG | 18:4/16:0/20:5  | 54:9  | 872.6894 | C57 H92 O6  | 18.142 | +NH4 |
| * | TG(18:4,16:1,18:2)  | TG | 18:4/16:1/18:2  | 52:7  | 848.6894 | C55 H92 O6  | 16.714 | +H   |
| * | TG(18:4,16:1,18:2)  | TG | 18:4/16:1/18:2  | 52:7  | 848.6894 | C55 H92 O6  | 16.573 | +H   |
| * | TG(18:4,17:1,18:3)  | TG | 18:4/17:1/18:3  | 53:8  | 860.6894 | C56 H92 O6  | 16.531 | +NH4 |
| * | TG(18:4,18:1,18:1)  | TG | 18:4/18:1/18:1  | 54:6  | 878.7363 | C57 H98 O6  | 17.022 | +H   |
| * | TG(18:4,18:2,18:2)  | TG | 18:4/18:2/18:2  | 54:8  | 874.705  | C57 H94 O6  | 16.52  | +H   |
| X | TG(18:4,18:2,18:3)  | TG | 18:4/18:2/18:3  | 54:9  | 872.6894 | C57 H92 O6  | 16.068 | +H   |
| X | TG(19:0,18:1,18:1)  | TG | 19:0/18:1/18:1  | 55:2  | 900.8146 | C58 H108 O6 | 21.014 | +NH4 |
| * | TG(19:0,18:1,18:2)  | TG | 19:0/18:1/18:2  | 55:3  | 898.7989 | C58 H106 O6 | 20.676 | +NH4 |
| X | TG(20:0,18:2,18:2)  | TG | 20:0/18:2/18:2  | 56:4  | 910.7989 | C59 H106 O6 | 20.559 | +NH4 |
| X | TG(20:0e,16:0,18:1) | TG | 20:0e/16:0/18:1 | 54:1e | 874.8353 | C57 H110 O5 | 21.78  | +NH4 |
| * | TG(20:0p,16:0,16:0) | TG | 20:0p/16:0/16:0 | 52:0p | 846.804  | C55 H106 O5 | 21.427 | +NH4 |
| * | TG(20:1,18:1,18:1)  | TG | 20:1/18:1/18:1  | 56:3  | 912.8146 | C59 H108 O6 | 20.766 | +NH4 |
| * | TG(20:1,18:1,18:2)  | TG | 20:1/18:1/18:2  | 56:4  | 910.7989 | C59 H106 O6 | 20.446 | +NH4 |
| X | TG(20:1,18:1,18:3)  | TG | 20:1/18:1/18:3  | 56:5  | 908.7833 | C59 H104 O6 | 20.102 | +NH4 |
| * | TG(20:1,18:2,18:2)  | TG | 20:1/18:2/18:2  | 56:5  | 908.7833 | C59 H104 O6 | 18.152 | +H   |
| X | TG(20:2,18:2,22:4)  | TG | 20:2/18:2/22:4  | 60:8  | 958.7989 | C63 H106 O6 | 19.914 | +NH4 |
| * | TG(20:1,18:2,22:6)  | TG | 20:1/18:2/22:6  | 60:9  | 956.7833 | C63 H104 O6 | 19.834 | +NH4 |
| * | TG(20:2,18:2,18:2)  | TG | 20:2/18:2/18:2  | 56:6  | 906.7676 | C59 H102 O6 | 19.693 | +H   |
| * | TG(20:2,18:2,18:2)  | TG | 20:2/18:2/18:2  | 56:6  | 906.7676 | C59 H102 O6 | 17.599 | +H   |
| * | TG(20:3,18:2,18:2)  | TG | 20:3/18:2/18:2  | 56:7  | 904.752  | C59 H100 O6 | 19.271 | +H   |
| * | TG(20:3,18:2,18:2)  | TG | 20:3/18:2/18:2  | 56:7  | 904.752  | C59 H100 O6 | 17.192 | +H   |
| X | TG(20:5,17:1,18:2)  | TG | 20:5/17:1/18:2  | 55:8  | 888.7207 | C58 H96 O6  | 18.755 | +NH4 |

|   |                    |    |                |       |          |             |        |      |
|---|--------------------|----|----------------|-------|----------|-------------|--------|------|
| X | TG(20:5,18:2,18:2) | TG | 20:5/18:2/18:2 | 56:9  | 900.7207 | C59 H96 O6  | 18.5   | +H   |
| * | TG(20:5,18:2,20:4) | TG | 20:5/18:2/20:4 | 58:11 | 924.7207 | C61 H96 O6  | 18.315 | +H   |
| * | TG(20:5,18:2,22:5) | TG | 20:5/18:2/22:5 | 60:12 | 950.7363 | C63 H98 O6  | 18.366 | +NH4 |
| X | TG(20:5,18:2,22:6) | TG | 20:5/18:2/22:6 | 60:13 | 948.7207 | C63 H96 O6  | 18.103 | +NH4 |
| X | TG(22:4,18:2,18:2) | TG | 22:4/18:2/18:2 | 58:8  | 930.7676 | C61 H102 O6 | 19.379 | +H   |
| * | TG(22:4,18:2,18:2) | TG | 22:4/18:2/18:2 | 58:8  | 930.7676 | C61 H102 O6 | 16.32  | +H   |
| * | TG(22:4,18:2,22:5) | TG | 22:4/18:2/22:5 | 62:11 | 980.7833 | C65 H104 O6 | 19.221 | +NH4 |
| * | TG(22:5,18:2,18:2) | TG | 22:5/18:2/18:2 | 58:9  | 928.752  | C61 H100 O6 | 16.863 | +H   |
| * | TG(24:0,18:2,18:2) | TG | 24:0/18:2/18:2 | 60:4  | 966.8615 | C63 H114 O6 | 21.372 | +NH4 |
| * | TG(8:0,12:0,14:0)  | TG | 8:0/12:0/14:0  | 34:0  | 610.5172 | C37 H70 O6  | 15.127 | +NH4 |
| * | TG(8:0,14:0,22:5)  | TG | 8:0/14:0/22:5  | 44:5  | 740.5955 | C47 H80 O6  | 16.291 | +H   |
| X | TG(8:0,18:1,18:2)  | TG | 8:0/18:1/18:2  | 44:3  | 744.6268 | C47 H84 O6  | 17.661 | +NH4 |
| X | TG(8:0,18:2,18:2)  | TG | 8:0/18:2/18:2  | 44:4  | 742.6111 | C47 H82 O6  | 16.918 | +NH4 |
| * | TG(8:0,8:0,10:0)   | TG | 8:0/8:0/10:0   | 26:0  | 498.392  | C29 H54 O6  | 8.997  | +NH4 |

Cer: ceramide, CE: cholesterol ester, CL: cardiolipin, DG: diacylglycerol, LysoPC: lysophosphatidylcholine, LysoPE: lysophosphatidylethanolamine, LysoPG: lysophosphatidylglycerol, LysoPI: lysophosphatidylinositol, LysoPS: lysophosphatidylserine, PA: phosphatidic acid, PC: phosphatidylcholine, PE: phosphatidylethanolamine, PG: phosphatidylglycerol, PI: phosphatidylinositol, PS: phosphatidylserine, So: sphingosine, SM: sphingomyelin, TG: triacylglycerol. X: detected by one-dimensional RPLC-MS/MS and two-dimensional NPLC-RPLC/MS-MS. \*: detected just by two-dimensional mixed-mode LC-RPLC/MS-MS.

Table A.3: Lipids identified in rat plasma by off-line two-dimensional high-performance liquid chromatography-high resolution mass spectrometry.

| Detection method | Lipid Molecule    | Class | Fatty acids (FA) | FA Group | Calc Mass | Formula       | Base Rt | Main Ion |
|------------------|-------------------|-------|------------------|----------|-----------|---------------|---------|----------|
| X                | Cer(d18:0/16:0)   | Cer   | d18:0/16:0       | d34:0    | 539.5277  | C34 H69 O3 N1 | 12.646  | +H       |
| *                | Cer(d18:0/18:0)   | Cer   | d18:0/18:0       | d36:0    | 567.559   | C36 H73 O3 N1 | 14.254  | +H       |
| *                | Cer(d18:0/20:0)   | Cer   | d18:0/20:0       | d38:0    | 595.5903  | C38 H77 O3 N1 | 15.776  | +H       |
| X                | Cer(d18:0/22:0)   | Cer   | d18:0/22:0       | d40:0    | 623.6216  | C40 H81 O3 N1 | 16.977  | +H       |
| *                | Cer(d18:0/24:0)   | Cer   | d18:0/24:0       | d42:0    | 651.6529  | C42 H85 O3 N1 | 17.908  | +H       |
| X                | Cer(d18:1/16:0)   | Cer   | d18:1/16:0       | d34:1    | 537.5121  | C34 H67 O3 N1 | 12.066  | +H       |
| *                | Cer(d18:1/18:0)   | Cer   | d18:1/18:0       | d36:1    | 565.5434  | C36 H71 O3 N1 | 13.712  | +H       |
| X                | Cer(d18:1/20:0)   | Cer   | d18:1/20:0       | d38:1    | 593.5747  | C38 H75 O3 N1 | 15.279  | +H       |
| X                | Cer(d18:1/22:0)   | Cer   | d18:1/22:0       | d40:1    | 621.606   | C40 H79 O3 N1 | 16.612  | +H       |
| X                | Cer(d18:1/24:0)   | Cer   | d18:1/24:0       | d42:1    | 649.6373  | C42 H83 O3 N1 | 17.455  | +H       |
| X                | Cer(d18:1/24:0)   | Cer   | d18:1/24:0       | d42:1    | 649.6373  | C42 H83 O3 N1 | 17.625  | +H       |
| X                | Cer(d18:1/24:1)   | Cer   | d18:1/24:1       | d42:2    | 647.6216  | C42 H81 O3 N1 | 16.454  | +H       |
| *                | Cer(d18:1/24:1)   | Cer   | d18:1/24:1       | d42:2    | 647.6216  | C42 H81 O3 N1 | 16.846  | +H       |
| *                | Cer(d18:2/22:0)   | Cer   | d18:2/22:0       | d40:2    | 619.5903  | C40 H77 O3 N1 | 15.589  | +H       |
| *                | ChE(18:2)         | CE    | 18:2             | 18:2     | 648.5845  | C45 H76 O2    | 20.82   | +NH4     |
| *                | ChE(20:4)         | CE    | 20:4             | 20:4     | 672.5845  | C47 H76 O2    | 20.508  | +NH4     |
| *                | DG(16:0/16:1/0:0) | DG    | 16:0/16:1        | 32:1     | 566.491   | C35 H66 O5    | 17.694  | +H       |
| *                | DG(16:0/16:1/0:0) | DG    | 16:0/16:1        | 32:1     | 566.491   | C35 H66 O5    | 18.252  | +H       |
| *                | DG(16:0/18:1/0:0) | DG    | 16:0/18:1        | 34:1     | 594.5223  | C37 H70 O5    | 18.144  | +H       |
| *                | DG(16:0/18:1/0:0) | DG    | 16:0/18:1        | 34:1     | 594.5223  | C37 H70 O5    | 18.659  | +H       |
| *                | DG(16:0/18:2/0:0) | DG    | 16:0/18:2        | 34:2     | 592.5067  | C37 H68 O5    | 17.703  | +H       |
| *                | DG(16:0/18:3/0:0) | DG    | 16:0/18:3        | 34:3     | 590.491   | C37 H66 O5    | 12.696  | +H       |
| *                | DG(16:1/18:1/0:0) | DG    | 16:1/18:1        | 34:2     | 592.5067  | C37 H68 O5    | 18.26   | +H       |
| *                | DG(16:1/18:2/0:0) | DG    | 16:1/18:2        | 34:3     | 590.491   | C37 H66 O5    | 17.061  | +H       |
| *                | DG(16:1/18:2/0:0) | DG    | 16:1/18:2        | 34:3     | 590.491   | C37 H66 O5    | 17.697  | +H       |
| *                | DG(18:1/18:1/0:0) | DG    | 18:1/18:1        | 36:2     | 620.538   | C39 H72 O5    | 14.977  | +NH4     |



|   |                   |     |           |       |          |                  |        |       |
|---|-------------------|-----|-----------|-------|----------|------------------|--------|-------|
| * | DG(18:1/18:1/0:0) | DG  | 18:1/18:1 | 36:2  | 620.538  | C39 H72 O5       | 18.645 | +H    |
| * | DG(18:1/18:2/0:0) | DG  | 18:1/18:2 | 36:3  | 618.5223 | C39 H70 O5       | 13.797 | +NH4  |
| * | DG(18:1/0:0/18:2) | DG  | 18:1/18:2 | 36:3  | 618.5223 | C39 H70 O5       | 17.638 | +H    |
| * | DG(18:2/18:2/0:0) | DG  | 18:2/18:2 | 36:4  | 616.5067 | C39 H68 O5       | 12.583 | +NH4  |
| * | DG(18:2/0:0/18:2) | DG  | 18:2/18:2 | 36:4  | 616.5067 | C39 H68 O5       | 12.654 | +NH4  |
| * | DG(18:2/18:2/0:0) | DG  | 18:2/18:2 | 36:4  | 616.5067 | C39 H68 O5       | 17.028 | +H    |
| * | DG(18:2/18:2/0:0) | DG  | 18:2/18:2 | 36:4  | 616.5067 | C39 H68 O5       | 17.575 | +H    |
| * | DG(18:2/18:2/0:0) | DG  | 18:2/18:2 | 36:4  | 616.5067 | C39 H68 O5       | 17.703 | +H    |
| * | DG(18:2/20:4/0:0) | DG  | 18:2/20:4 | 38:6  | 640.5067 | C41 H68 O5       | 12.221 | +NH4  |
| * | DG(18:2/22:6/0:0) | DG  | 18:2/22:6 | 40:8  | 664.5067 | C43 H68 O5       | 11.815 | +NH4  |
| * | DG(18:3/18:2/0:0) | DG  | 18:3/18:2 | 36:5  | 614.491  | C39 H66 O5       | 11.539 | +H    |
| * | DG(18:3/18:2/0:0) | DG  | 18:3/18:2 | 36:5  | 614.491  | C39 H66 O5       | 16.408 | +H    |
| * | DG(18:3/18:3/0:0) | DG  | 18:3/18:3 | 36:6  | 612.4754 | C39 H64 O5       | 10.497 | +H    |
| * | DG(20:5/18:2/0:0) | DG  | 20:5/18:2 | 38:7  | 638.491  | C41 H66 O5       | 11.199 | +H    |
| * | DG(22:4/18:2/0:0) | DG  | 22:4/18:2 | 40:6  | 668.538  | C43 H72 O5       | 13.361 | +NH4  |
| * | LysoPC(0:0/14:0)  | LPC | 14:00     | 14:0  | 467.3012 | C22 H46 O7 N1 P1 | 1.541  | +H    |
| * | LysoPC(14:0/0:0)  | LPC | 14:00     | 14:0  | 467.3012 | C22 H46 O7 N1 P1 | 1.667  | +H    |
| X | LysoPC(0:0/15:0)  | LPC | 15:00     | 15:0  | 481.3168 | C23 H48 O7 N1 P1 | 1.851  | +H    |
| X | LysoPC(15:0/0:0)  | LPC | 15:00     | 15:0  | 481.3168 | C23 H48 O7 N1 P1 | 2.018  | +H    |
| X | LysoPC(0:0/16:0)  | LPC | 16:00     | 16:0  | 495.3325 | C24 H50 O7 N1 P1 | 2.116  | +HCOO |
| X | LysoPC(16:0/0:0)  | LPC | 16:00     | 16:0  | 495.3325 | C24 H50 O7 N1 P1 | 2.452  | +H    |
| * | LysoPC(16:0e)     | LPC | 16:0e     | 16:0e | 481.3532 | C24 H52 O6 N1 P1 | 2.817  | +H    |
| * | LysoPC(16:0e)     | LPC | 16:0e     | 16:0e | 481.3532 | C24 H52 O6 N1 P1 | 2.946  | +H    |
| * | LysoPC(16:0p)     | LPC | 16:0p     | 16:0p | 479.3376 | C24 H50 O6 N1 P1 | 2.092  | +H    |
| * | LysoPC(16:0p)     | LPC | 16:0p     | 16:0p | 479.3376 | C24 H50 O6 N1 P1 | 2.85   | +H    |
| X | LysoPC(0:0/16:1)  | LPC | 16:01     | 16:1  | 493.3168 | C24 H48 O7 N1 P1 | 1.674  | +H    |
| X | LysoPC(16:1/0:0)  | LPC | 16:01     | 16:1  | 493.3168 | C24 H48 O7 N1 P1 | 1.78   | +H    |
| X | LysoPC(16:1p)     | LPC | 16:1p     | 16:1p | 477.3219 | C24 H48 O6 N1 P1 | 2.255  | +H    |
| * | LysoPC(16:1p)     | LPC | 16:1p     | 16:1p | 477.3219 | C24 H48 O6 N1 P1 | 2.457  | +H    |
| * | LysoPC(0:0/16:2)  | LPC | 16:02     | 16:2  | 491.3012 | C24 H46 O7 N1 P1 | 1.467  | +H    |

|   |                  |     |       |       |          |                  |       |       |
|---|------------------|-----|-------|-------|----------|------------------|-------|-------|
| * | LysoPC(16:2/0:0) | LPC | 16:02 | 16:2  | 491.3012 | C24 H46 O7 N1 P1 | 1.632 | +H    |
| X | LysoPC(0:0/17:0) | LPC | 17:00 | 17:0  | 509.3481 | C25 H52 O7 N1 P1 | 2.571 | +H    |
| X | LysoPC(17:0/0:0) | LPC | 17:00 | 17:0  | 509.3481 | C25 H52 O7 N1 P1 | 2.792 | +H    |
| X | LysoPC(17:2/0:0) | LPC | 17:02 | 17:2  | 505.3168 | C25 H48 O7 N1 P1 | 1.679 | +H    |
| X | LysoPC(0:0/18:0) | LPC | 18:00 | 18:0  | 523.3638 | C26 H54 O7 N1 P1 | 3.462 | +H    |
| X | LysoPC(18:0/0:0) | LPC | 18:00 | 18:0  | 523.3638 | C26 H54 O7 N1 P1 | 3.791 | +H    |
| * | LysoPC(18:0e)    | LPC | 18:0e | 18:0e | 509.3845 | C26 H56 O6 N1 P1 | 4.288 | +H    |
| X | LysoPC(18:0e)    | LPC | 18:0e | 18:0e | 509.3845 | C26 H56 O6 N1 P1 | 4.56  | +H    |
| X | LysoPC(18:0p)    | LPC | 18:0p | 18:0p | 507.3689 | C26 H54 O6 N1 P1 | 3.127 | +H    |
| X | LysoPC(18:0p)    | LPC | 18:0p | 18:0p | 507.3689 | C26 H54 O6 N1 P1 | 4.154 | +H    |
| X | LysoPC(0:0/18:1) | LPC | 18:01 | 18:01 | 521.3481 | C26 H52 O7 N1 P1 | 2.382 | +H    |
| X | LysoPC(18:1/0:0) | LPC | 18:01 | 18:01 | 521.3481 | C26 H52 O7 N1 P1 | 2.629 | +H    |
| * | LysoPC(18:1p)    | LPC | 18:1p | 18:1p | 505.3532 | C26 H52 O6 N1 P1 | 3.023 | +H    |
| X | LysoPC(18:1p)    | LPC | 18:1p | 18:1p | 505.3532 | C26 H52 O6 N1 P1 | 3.466 | +H    |
| X | LysoPC(18:1p)    | LPC | 18:1p | 18:1p | 505.3532 | C26 H52 O6 N1 P1 | 3.804 | +H    |
| X | LysoPC(0:0/18:2) | LPC | 18:02 | 18:2  | 519.3325 | C26 H50 O7 N1 P1 | 1.842 | +H    |
| X | LysoPC(18:2/0:0) | LPC | 18:02 | 18:2  | 519.3325 | C26 H50 O7 N1 P1 | 1.984 | +H    |
| * | LysoPC(18:2p)    | LPC | 18:2p | 18:2p | 503.3376 | C26 H50 O6 N1 P1 | 1.797 | +H    |
| X | LysoPC(18:2p)    | LPC | 18:2p | 18:2p | 503.3376 | C26 H50 O6 N1 P1 | 2.258 | +H    |
| * | LysoPC(18:2p)    | LPC | 18:2p | 18:2p | 503.3376 | C26 H50 O6 N1 P1 | 2.635 | +H    |
| X | LysoPC(0:0/18:3) | LPC | 18:03 | 18:3  | 517.3168 | C26 H48 O7 N1 P1 | 1.42  | +H    |
| * | LysoPC(0:0/18:4) | LPC | 18:04 | 18:4  | 515.3012 | C26 H46 O7 N1 P1 | 1.376 | +H    |
| * | LysoPC(18:4/0:0) | LPC | 18:04 | 18:4  | 515.3012 | C26 H46 O7 N1 P1 | 1.738 | +H    |
| X | LysoPC(0:0/19:0) | LPC | 19:00 | 19:0  | 537.3794 | C27 H56 O7 N1 P1 | 4.308 | +H    |
| X | LysoPC(19:0/0:0) | LPC | 19:00 | 19:0  | 537.3794 | C27 H56 O7 N1 P1 | 4.679 | +H    |
| X | LysoPC(0:0/20:0) | LPC | 20:00 | 20:0  | 551.3951 | C28 H58 O7 N1 P1 | 4.882 | +H    |
| X | LysoPC(20:0/0:0) | LPC | 20:00 | 20:0  | 551.3951 | C28 H58 O7 N1 P1 | 5.398 | +HCOO |
| * | LysoPC(20:0e)    | LPC | 20:0e | 20:0e | 537.4158 | C28 H60 O6 N1 P1 | 6.487 | +H    |
| X | LysoPC(20:0e)    | LPC | 20:0e | 20:0e | 537.4158 | C28 H60 O6 N1 P1 | 6.609 | +H    |
| X | LysoPC(20:0p)    | LPC | 20:0p | 20:0p | 535.4002 | C28 H58 O6 N1 P1 | 4.648 | +H    |

|   |                  |     |          |       |          |                  |       |       |
|---|------------------|-----|----------|-------|----------|------------------|-------|-------|
| X | LysoPC(20:0p)    | LPC | 20:0p    | 20:0p | 535.4002 | C28 H58 O6 N1 P1 | 6.484 | +H    |
| X | LysoPC(0:0/20:1) | LPC | 20:01    | 20:1  | 549.3794 | C28 H56 O7 N1 P1 | 3.592 | +H    |
| X | LysoPC(20:1/0:0) | LPC | 20:01    | 20:1  | 549.3794 | C28 H56 O7 N1 P1 | 3.912 | +H    |
| X | LysoPC(20:1p)    | LPC | 20:1p    | 20:1p | 533.3845 | C28 H56 O6 N1 P1 | 3.396 | +H    |
| * | LysoPC(20:1p)    | LPC | 20:1p    | 20:1p | 533.3845 | C28 H56 O6 N1 P1 | 5.702 | +H    |
| X | LysoPC(0:0/20:2) | LPC | 20:02    | 20:2  | 547.3638 | C28 H54 O7 N1 P1 | 2.65  | +H    |
| X | LysoPC(20:2/0:0) | LPC | 20:02    | 20:2  | 547.3638 | C28 H54 O7 N1 P1 | 2.859 | +H    |
| X | LysoPC(0:0/20:3) | LPC | 20:03    | 20:3  | 545.3481 | C28 H52 O7 N1 P1 | 2.093 | +H    |
| * | LysoPC(20:3/0:0) | LPC | 20:03    | 20:3  | 545.3481 | C28 H52 O7 N1 P1 | 2.257 | +H    |
| X | LysoPC(0:0/20:4) | LPC | 20:04    | 20:4  | 543.3325 | C28 H50 O7 N1 P1 | 1.792 | +H    |
| X | LysoPC(20:4/0:0) | LPC | 20:04    | 20:4  | 543.3325 | C28 H50 O7 N1 P1 | 1.905 | +H    |
| X | LysoPC(0:0/20:5) | LPC | 20:05    | 20:5  | 541.3168 | C28 H48 O7 N1 P1 | 1.457 | +HCOO |
| * | LysoPC(20:5/0:0) | LPC | 20:05    | 20:5  | 541.3168 | C28 H48 O7 N1 P1 | 1.802 | +H    |
| X | LysoPC(21:0/0:0) | LPC | 21:00    | 21:0  | 565.4107 | C29 H60 O7 N1 P1 | 6.214 | +H    |
| X | LysoPC(21:0/0:0) | LPC | 21:00    | 21:0  | 565.4107 | C29 H60 O7 N1 P1 | 6.689 | +H    |
| X | LysoPC(0:0/22:0) | LPC | 22:00    | 22:0  | 579.4264 | C30 H62 O7 N1 P1 | 7.126 | +H    |
| X | LysoPC(22:0/0:0) | LPC | 22:00    | 22:0  | 579.4264 | C30 H62 O7 N1 P1 | 7.454 | +H    |
| * | LysoPC(0:0/22:4) | LPC | 22:04    | 22:4  | 571.3638 | C30 H54 O7 N1 P1 | 2.382 | +H    |
| * | LysoPC(22:4/0:0) | LPC | 22:04    | 22:4  | 571.3638 | C30 H54 O7 N1 P1 | 2.559 | +H    |
| * | LysoPC(0:0/22:4) | LPC | 22:04    | 22:4  | 571.3638 | C30 H54 O7 N1 P1 | 3.621 | +H    |
| * | LysoPC(22:4/0:0) | LPC | 22:04    | 22:4  | 571.3638 | C30 H54 O7 N1 P1 | 3.945 | +H    |
| X | LysoPC(22:5/0:0) | LPC | 22:05    | 22:5  | 569.3481 | C30 H52 O7 N1 P1 | 2.045 | +H    |
| X | LysoPC(0:0/22:5) | LPC | 22:05    | 22:5  | 569.3481 | C30 H52 O7 N1 P1 | 2.278 | +H    |
| * | LysoPC(22:5/0:0) | LPC | 22:05    | 22:5  | 569.3481 | C30 H52 O7 N1 P1 | 2.872 | +H    |
| * | LysoPC(22:5/0:0) | LPC | 22:05    | 22:5  | 569.3481 | C30 H52 O7 N1 P1 | 3.183 | +H    |
| X | LysoPC(22:6/0:0) | LPC | 22:06    | 22:6  | 567.3325 | C30 H50 O7 N1 P1 | 1.796 | +H    |
| * | LysoPC(22:6/0:0) | LPC | 22:06    | 22:6  | 567.3325 | C30 H50 O7 N1 P1 | 2.341 | +H    |
| * | LysoPC(0:0/23:0) | LPC | 23:00    | 23:0  | 593.442  | C31 H64 O7 N1 P1 | 7.929 | +H    |
| * | LysoPC(23:0/0:0) | LPC | 23:00    | 23:0  | 593.442  | C31 H64 O7 N1 P1 | 8.286 | +H    |
| X | LysoPC(0:0/24:0) | LPC | 24:00:00 | 24:0  | 607.4577 | C32 H66 O7 N1 P1 | 8.761 | +H    |

|   |                  |     |          |       |          |                  |        |    |
|---|------------------|-----|----------|-------|----------|------------------|--------|----|
| X | LysoPC(24:0/0:0) | LPC | 24:00:00 | 24:0  | 607.4577 | C32 H66 O7 N1 P1 | 9.14   | +H |
| X | LysoPC(0:0/24:1) | LPC | 24:01:00 | 24:1  | 605.442  | C32 H64 O7 N1 P1 | 7.058  | +H |
| X | LysoPC(24:1/0:0) | LPC | 24:01:00 | 24:1  | 605.442  | C32 H64 O7 N1 P1 | 7.376  | +H |
| * | LysoPC(0:0/25:0) | LPC | 25:00:00 | 25:0  | 621.4733 | C33 H68 O7 N1 P1 | 9.641  | +H |
| X | LysoPC(25:0/0:0) | LPC | 25:00:00 | 25:0  | 621.4733 | C33 H68 O7 N1 P1 | 10.045 | +H |
| * | LysoPE(15:0)     | LPE | 15:00    | 15:0  | 439.2699 | C20 H42 O7 N1 P1 | 2.095  | -H |
| * | LysoPE(16:0)     | LPE | 16:00    | 16:0  | 453.2855 | C21 H44 O7 N1 P1 | 2.383  | +H |
| X | LysoPE(16:0)     | LPE | 16:00    | 16:0  | 453.2855 | C21 H44 O7 N1 P1 | 2.587  | -H |
| * | LysoPE(16:0e)    | LPE | 16:0e    | 16:0e | 439.3063 | C21 H46 O6 N1 P1 | 3.132  | -H |
| * | LysoPE(16:1)     | LPE | 16:01    | 16:1  | 451.2699 | C21 H42 O7 N1 P1 | 1.869  | -H |
| * | LysoPE(17:0)     | LPE | 17:00    | 17:0  | 467.3012 | C22 H46 O7 N1 P1 | 2.962  | -H |
| * | LysoPE(17:0)     | LPE | 17:00    | 17:0  | 467.3012 | C22 H46 O7 N1 P1 | 3.215  | +H |
| X | LysoPE(18:0)     | LPE | 18:00    | 18:0  | 481.3168 | C23 H48 O7 N1 P1 | 3.679  | +H |
| * | LysoPE(18:0)     | LPE | 18:00    | 18:0  | 481.3168 | C23 H48 O7 N1 P1 | 3.999  | +H |
| * | LysoPE(18:0e)    | LPE | 18:0e    | 18:0e | 467.3376 | C23 H50 O6 N1 P1 | 4.833  | -H |
| * | LysoPE(18:1)     | LPE | 18:01    | 18:1  | 479.3012 | C23 H46 O7 N1 P1 | 2.568  | -H |
| * | LysoPE(18:1)     | LPE | 18:01    | 18:1  | 479.3012 | C23 H46 O7 N1 P1 | 2.767  | -H |
| * | LysoPE(18:2)     | LPE | 18:02    | 18:2  | 477.2855 | C23 H44 O7 N1 P1 | 1.931  | +H |
| X | LysoPE(18:2)     | LPE | 18:02    | 18:2  | 477.2855 | C23 H44 O7 N1 P1 | 2.074  | -H |
| * | LysoPE(18:3)     | LPE | 18:03    | 18:3  | 475.2699 | C23 H42 O7 N1 P1 | 1.654  | -H |
| * | LysoPE(20:0e)    | LPE | 20:0e    | 20:0e | 495.3689 | C25 H54 O6 N1 P1 | 6.861  | -H |
| * | LysoPE(20:1)     | LPE | 20:01    | 20:1  | 507.3325 | C25 H50 O7 N1 P1 | 4.124  | -H |
| * | LysoPE(20:2)     | LPE | 20:02    | 20:2  | 505.3168 | C25 H48 O7 N1 P1 | 3.014  | -H |
| * | LysoPE(20:3)     | LPE | 20:03    | 20:3  | 503.3012 | C25 H46 O7 N1 P1 | 2.352  | -H |
| * | LysoPE(20:4)     | LPE | 20:04    | 20:4  | 501.2855 | C25 H44 O7 N1 P1 | 1.861  | -H |
| X | LysoPE(20:4)     | LPE | 20:04    | 20:4  | 501.2855 | C25 H44 O7 N1 P1 | 2.008  | -H |
| * | LysoPE(22:5)     | LPE | 22:05    | 22:5  | 527.3012 | C27 H46 O7 N1 P1 | 2.1    | -H |
| * | LysoPG(16:0)     | LPG | 16:0     | 16:0  | 484.2801 | C22 H45 O9 N0 P1 | 2.314  | -H |
| * | LysoPG(18:1)     | LPG | 18:1     | 18:1  | 510.2958 | C24 H47 O9 N0 P1 | 2.465  | -H |
| * | LysoPG(18:2)     | LPG | 18:2     | 18:2  | 508.2801 | C24 H45 O9 N0 P1 | 1.734  | -H |

|   |               |     |           |      |          |                   |        |       |
|---|---------------|-----|-----------|------|----------|-------------------|--------|-------|
| * | LysoPG(20:4)  | LPG | 20:4      | 20:4 | 532.2801 | C26 H45 O9 N0 P1  | 1.801  | -H    |
| * | LysoPG(22:6)  | LPG | 22:6      | 22:6 | 556.2801 | C28 H45 O9 N0 P1  | 1.713  | -H    |
| * | LysoPI(18:0)  | LPI | 18:0      | 18:0 | 600.3275 | C27 H53 O12 N0 P1 | 3.238  | -H    |
| * | LysoPI(18:2)  | LPI | 18:2      | 18:2 | 596.2962 | C27 H49 O12 N0 P1 | 1.599  | -H    |
| * | LysoPI(18:2)  | LPI | 18:2      | 18:2 | 596.2962 | C27 H49 O12 N0 P1 | 1.744  | -H    |
| * | LysoPI(20:4)  | LPI | 20:4      | 20:4 | 620.2962 | C29 H49 O12 N0 P1 | 1.693  | -H    |
| X | PC(14:0/18:2) | PC  | 14:0/18:2 | 32:2 | 729.5309 | C40 H76 O8 N1 P1  | 9.42   | +H    |
| X | PC(14:0/22:6) | PC  | 14:0/22:6 | 36:6 | 777.5309 | C44 H76 O8 N1 P1  | 8.891  | +H    |
| * | PC(15:0/16:0) | PC  | 15:0/16:0 | 31:0 | 719.5465 | C39 H78 O8 N1 P1  | 11.216 | +H    |
| X | PC(15:0/18:1) | PC  | 15:0/18:1 | 33:1 | 745.5622 | C41 H80 O8 N1 P1  | 11.365 | +H    |
| * | PC(15:0/18:2) | PC  | 15:0/18:2 | 33:2 | 743.5465 | C41 H78 O8 N1 P1  | 10.182 | +H    |
| X | PC(15:0/20:2) | PC  | 15:0/20:2 | 35:2 | 771.5778 | C43 H82 O8 N1 P1  | 14.389 | +H    |
| X | PC(15:0/20:3) | PC  | 15:0/20:3 | 35:3 | 769.5622 | C43 H80 O8 N1 P1  | 13.443 | +H    |
| * | PC(15:0/20:4) | PC  | 15:0/20:4 | 35:4 | 767.5465 | C43 H78 O8 N1 P1  | 10.016 | +HCOO |
| X | PC(15:0/22:5) | PC  | 15:0/22:5 | 37:5 | 793.5622 | C45 H80 O8 N1 P1  | 10.081 | +H    |
| X | PC(15:0/22:6) | PC  | 15:0/22:6 | 37:6 | 791.5465 | C45 H78 O8 N1 P1  | 9.63   | +H    |
| * | PC(16:0/14:0) | PC  | 16:0/14:0 | 30:0 | 705.5309 | C38 H76 O8 N1 P1  | 10.445 | +H    |
| X | PC(16:0/16:0) | PC  | 16:0/16:0 | 32:0 | 733.5622 | C40 H80 O8 N1 P1  | 11.733 | +H    |
| X | PC(16:0/16:0) | PC  | 16:0/16:0 | 32:0 | 733.5622 | C40 H80 O8 N1 P1  | 11.997 | +H    |
| X | PC(16:0/17:0) | PC  | 16:0/17:0 | 33:0 | 747.5778 | C41 H82 O8 N1 P1  | 12.811 | +H    |
| * | PC(16:0/18:1) | PC  | 16:0/18:1 | 34:1 | 759.5778 | C42 H82 O8 N1 P1  | 11.941 | +HCOO |
| X | PC(16:0/18:1) | PC  | 16:0/18:1 | 34:1 | 759.5778 | C42 H82 O8 N1 P1  | 12.119 | +H    |
| X | PC(16:0/18:2) | PC  | 16:0/18:2 | 34:2 | 757.5622 | C42 H80 O8 N1 P1  | 10.967 | +H    |
| X | PC(16:0/20:2) | PC  | 16:0/20:2 | 36:2 | 785.5935 | C44 H84 O8 N1 P1  | 12.258 | +H    |
| * | PC(16:0/20:3) | PC  | 16:0/20:3 | 36:3 | 783.5778 | C44 H82 O8 N1 P1  | 11.363 | +H    |
| X | PC(16:0/20:3) | PC  | 16:0/20:3 | 36:3 | 783.5778 | C44 H82 O8 N1 P1  | 11.558 | +H    |
| X | PC(16:0/20:4) | PC  | 16:0/20:4 | 36:4 | 781.5622 | C44 H80 O8 N1 P1  | 10.746 | +H    |
| * | PC(16:0/20:5) | PC  | 16:0/20:5 | 36:5 | 779.5465 | C44 H78 O8 N1 P1  | 10.373 | +H    |
| X | PC(16:0/22:4) | PC  | 16:0/22:4 | 38:4 | 809.5935 | C46 H84 O8 N1 P1  | 11.803 | +H    |
| * | PC(16:0/22:4) | PC  | 16:0/22:4 | 38:4 | 809.5935 | C46 H84 O8 N1 P1  | 19.577 | +H    |

|   |                |    |            |       |          |                  |        |       |
|---|----------------|----|------------|-------|----------|------------------|--------|-------|
| * | PC(16:0/22:5)  | PC | 16:0/22:5  | 38:5  | 807.5778 | C46 H82 O8 N1 P1 | 10.842 | +H    |
| X | PC(16:0/22:5)  | PC | 16:0/22:5  | 38:5  | 807.5778 | C46 H82 O8 N1 P1 | 11.367 | +H    |
| X | PC(16:0/22:6)  | PC | 16:0/22:6  | 38:6  | 805.5622 | C46 H80 O8 N1 P1 | 10.4   | +H    |
| * | PC(16:0e/16:0) | PC | 16:0e/16:0 | 32:0e | 719.5829 | C40 H82 O7 N1 P1 | 12.997 | +H    |
| * | PC(16:0e/18:1) | PC | 16:0e/18:1 | 34:1e | 745.5985 | C42 H84 O7 N1 P1 | 13.053 | +H    |
| * | PC(16:0e/18:2) | PC | 16:0e/18:2 | 34:2e | 743.5829 | C42 H82 O7 N1 P1 | 11.81  | +H    |
| * | PC(16:0e/18:2) | PC | 16:0e/18:2 | 34:2e | 743.5829 | C42 H82 O7 N1 P1 | 11.987 | +H    |
| X | PC(16:0e/20:4) | PC | 16:0e/20:4 | 36:4e | 767.5829 | C44 H82 O7 N1 P1 | 11.801 | +H    |
| X | PC(16:0e/22:4) | PC | 16:0e/22:4 | 38:4e | 795.6142 | C46 H86 O7 N1 P1 | 12.803 | +H    |
| X | PC(16:0p/16:0) | PC | 16:0p/16:0 | 32:0p | 717.5672 | C40 H80 O7 N1 P1 | 12.817 | +HCOO |
| X | PC(16:0p/18:2) | PC | 16:0p/18:2 | 34:2p | 741.5672 | C42 H80 O7 N1 P1 | 11.763 | +H    |
| X | PC(16:1/18:1)  | PC | 16:1/18:1  | 34:2  | 757.5622 | C42 H80 O8 N1 P1 | 10.802 | +H    |
| X | PC(16:1/18:2)  | PC | 16:1/18:2  | 34:3  | 755.5465 | C42 H78 O8 N1 P1 | 9.599  | +H    |
| X | PC(16:1/18:2)  | PC | 16:1/18:2  | 34:3  | 755.5465 | C42 H78 O8 N1 P1 | 9.758  | +HCOO |
| X | PC(16:1/18:2)  | PC | 16:1/18:2  | 34:3  | 755.5465 | C42 H78 O8 N1 P1 | 10.054 | +H    |
| X | PC(16:1/20:4)  | PC | 16:1/20:4  | 36:5  | 779.5465 | C44 H78 O8 N1 P1 | 9.461  | +H    |
| * | PC(16:1/20:5)  | PC | 16:1/20:5  | 36:6  | 777.5309 | C44 H76 O8 N1 P1 | 8.643  | +HCOO |
| X | PC(16:2/18:2)  | PC | 16:2/18:2  | 34:4  | 753.5309 | C42 H76 O8 N1 P1 | 8.724  | +H    |
| X | PC(16:2/18:2)  | PC | 16:2/18:2  | 34:4  | 753.5309 | C42 H76 O8 N1 P1 | 9.232  | +H    |
| X | PC(17:0/18:1)  | PC | 17:0/18:1  | 35:1  | 773.5935 | C43 H84 O8 N1 P1 | 13.001 | +H    |
| X | PC(17:0/18:2)  | PC | 17:0/18:2  | 35:2  | 771.5778 | C43 H82 O8 N1 P1 | 11.385 | +H    |
| X | PC(17:0/18:2)  | PC | 17:0/18:2  | 35:2  | 771.5778 | C43 H82 O8 N1 P1 | 11.587 | +H    |
| X | PC(17:0/18:2)  | PC | 17:0/18:2  | 35:2  | 771.5778 | C43 H82 O8 N1 P1 | 11.764 | +H    |
| X | PC(17:0/20:3)  | PC | 17:0/20:3  | 37:3  | 797.5935 | C45 H84 O8 N1 P1 | 12.238 | +H    |
| X | PC(17:0/20:4)  | PC | 17:0/20:4  | 37:4  | 795.5778 | C45 H82 O8 N1 P1 | 11.561 | +H    |
| X | PC(17:0/22:5)  | PC | 17:0/22:5  | 39:5  | 821.5935 | C47 H84 O8 N1 P1 | 12.247 | +H    |
| X | PC(17:0/22:6)  | PC | 17:0/22:6  | 39:6  | 819.5778 | C47 H82 O8 N1 P1 | 10.941 | +H    |
| X | PC(17:0/22:6)  | PC | 17:0/22:6  | 39:6  | 819.5778 | C47 H82 O8 N1 P1 | 11.189 | +H    |
| X | PC(18:0/16:0)  | PC | 18:0/16:0  | 34:0  | 761.5935 | C42 H84 O8 N1 P1 | 13.398 | +H    |
| X | PC(18:0/16:0)  | PC | 18:0/16:0  | 34:0  | 761.5935 | C42 H84 O8 N1 P1 | 13.572 | +H    |

|   |                |    |            |       |          |                  |        |       |
|---|----------------|----|------------|-------|----------|------------------|--------|-------|
| X | PC(18:0/17:0)  | PC | 18:0/17:0  | 35:0  | 775.6091 | C43 H86 O8 N1 P1 | 14.410 | +H    |
| X | PC(18:0/18:0)  | PC | 18:0/18:0  | 36:0  | 789.6248 | C44 H88 O8 N1 P1 | 15.055 | +H    |
| X | PC(18:0/18:1)  | PC | 18:0/18:1  | 36:1  | 787.6091 | C44 H86 O8 N1 P1 | 13.692 | +H    |
| X | PC(18:0/18:2)  | PC | 18:0/18:2  | 36:2  | 785.5935 | C44 H84 O8 N1 P1 | 12.562 | +H    |
| * | PC(18:0/20:2)  | PC | 18:0/20:2  | 38:2  | 813.6248 | C46 H88 O8 N1 P1 | 13.887 | +H    |
| X | PC(18:0/20:3)  | PC | 18:0/20:3  | 38:3  | 811.6091 | C46 H86 O8 N1 P1 | 12.95  | +H    |
| X | PC(18:0/20:3)  | PC | 18:0/20:3  | 38:3  | 811.6091 | C46 H86 O8 N1 P1 | 13.128 | +H    |
| X | PC(18:0/20:4)  | PC | 18:0/20:4  | 38:4  | 809.5935 | C46 H84 O8 N1 P1 | 12.076 | +H    |
| X | PC(18:0/20:4)  | PC | 18:0/20:4  | 38:4  | 809.5935 | C46 H84 O8 N1 P1 | 12.341 | +H    |
| X | PC(18:0/22:4)  | PC | 18:0/22:4  | 40:4  | 837.6248 | C48 H88 O8 N1 P1 | 13.461 | +H    |
| * | PC(18:0/22:5)  | PC | 18:0/22:5  | 40:5  | 835.6091 | C48 H86 O8 N1 P1 | 12.428 | +H    |
| X | PC(18:0/22:5)  | PC | 18:0/22:5  | 40:5  | 835.6091 | C48 H86 O8 N1 P1 | 12.933 | +H    |
| X | PC(18:0/22:6)  | PC | 18:0/22:6  | 40:6  | 833.5935 | C48 H84 O8 N1 P1 | 11.951 | +H    |
| * | PC(18:0/22:6)  | PC | 18:0/22:6  | 40:6  | 833.5935 | C48 H84 O8 N1 P1 | 12.989 | +H    |
| * | PC(18:0/22:6)  | PC | 18:0/22:6  | 40:6  | 833.5935 | C48 H84 O8 N1 P1 | 13.455 | +H    |
| X | PC(18:0e/16:0) | PC | 18:0e/16:0 | 34:0e | 747.6142 | C42 H86 O7 N1 P1 | 14.591 | +H    |
| X | PC(18:0p/16:0) | PC | 18:0p/16:0 | 34:0p | 745.5985 | C42 H84 O7 N1 P1 | 13.085 | +HCOO |
| X | PC(18:0p/16:0) | PC | 18:0p/16:0 | 34:0p | 745.5985 | C42 H84 O7 N1 P1 | 13.132 | +HCOO |
| X | PC(18:0p/18:2) | PC | 18:0p/18:2 | 36:2p | 769.5985 | C44 H84 O7 N1 P1 | 11.994 | +H    |
| X | PC(18:0p/20:4) | PC | 18:0p/20:4 | 38:4p | 793.5985 | C46 H84 O7 N1 P1 | 11.852 | +H    |
| X | PC(18:0p/22:6) | PC | 18:0p/22:6 | 40:6p | 817.5985 | C48 H84 O7 N1 P1 | 11.451 | +H    |
| X | PC(18:0p/22:6) | PC | 18:0p/22:6 | 40:6p | 817.5985 | C48 H84 O7 N1 P1 | 12.734 | +H    |
| X | PC(18:1/14:0)  | PC | 18:1/14:0  | 32:1  | 731.5465 | C40 H78 O8 N1 P1 | 10.618 | +H    |
| X | PC(18:1/18:1)  | PC | 18:1/18:1  | 36:2  | 785.5935 | C44 H84 O8 N1 P1 | 12.358 | +H    |
| * | PC(18:1/18:2)  | PC | 18:1/18:2  | 36:3  | 783.5778 | C44 H82 O8 N1 P1 | 11.093 | +H    |
| * | PC(18:1/20:3)  | PC | 18:1/20:3  | 38:4  | 809.5935 | C46 H84 O8 N1 P1 | 11.479 | +H    |
| X | PC(18:1/20:4)  | PC | 18:1/20:4  | 38:5  | 807.5778 | C46 H82 O8 N1 P1 | 11.129 | +H    |
| * | PC(18:1/22:0)  | PC | 18:1/22:0  | 40:1  | 843.6717 | C48 H94 O8 N1 P1 | 16.494 | +H    |
| X | PC(18:1/22:6)  | PC | 18:1/22:6  | 40:7  | 831.5778 | C48 H82 O8 N1 P1 | 10.803 | +H    |
| X | PC(18:1/24:0)  | PC | 18:1/24:0  | 42:1  | 871.703  | C50 H98 O8 N1 P1 | 17.497 | +H    |

|   |                |    |            |       |          |                  |        |       |
|---|----------------|----|------------|-------|----------|------------------|--------|-------|
| X | PC(18:2/18:2)  | PC | 18:2/18:2  | 36:4  | 781.5622 | C44 H80 O8 N1 P1 | 10.844 | +H    |
| X | PC(18:2/18:2)  | PC | 18:2/18:2  | 36:4  | 781.5622 | C44 H80 O8 N1 P1 | 9.92   | +H    |
| X | PC(18:2/20:4)  | PC | 18:2/20:4  | 38:6  | 805.5622 | C46 H80 O8 N1 P1 | 9.715  | +H    |
| * | PC(18:2/21:0)  | PC | 18:2/21:0  | 39:2  | 827.6404 | C47 H90 O8 N1 P1 | 14.893 | +H    |
| X | PC(18:2/22:6)  | PC | 18:2/22:6  | 40:8  | 829.5622 | C48 H80 O8 N1 P1 | 9.416  | +H    |
| X | PC(18:2/23:0)  | PC | 18:2/23:0  | 41:2  | 855.6717 | C49 H94 O8 N1 P1 | 16.304 | +H    |
| X | PC(18:2p/18:2) | PC | 18:2p/18:2 | 36:4p | 765.5672 | C44 H80 O7 N1 P1 | 10.656 | +H    |
| * | PC(18:3/18:2)  | PC | 18:3/18:2  | 36:5  | 779.5465 | C44 H78 O8 N1 P1 | 8.957  | +H    |
| X | PC(19:0/18:2)  | PC | 19:0/18:2  | 37:2  | 799.6091 | C45 H86 O8 N1 P1 | 13.445 | +H    |
| X | PC(19:0/20:4)  | PC | 19:0/20:4  | 39:4  | 823.6091 | C47 H86 O8 N1 P1 | 13.237 | +HCOO |
| X | PC(19:0/22:6)  | PC | 19:0/22:6  | 41:6  | 847.6091 | C49 H86 O8 N1 P1 | 12.521 | +H    |
| * | PC(20:0/18:2)  | PC | 20:0/18:2  | 38:2  | 813.6248 | C46 H88 O8 N1 P1 | 14.142 | +H    |
| X | PC(20:0/20:4)  | PC | 20:0/20:4  | 40:4  | 837.6248 | C48 H88 O8 N1 P1 | 14.004 | +H    |
| X | PC(20:0/22:6)  | PC | 20:0/22:6  | 42:6  | 861.6248 | C50 H88 O8 N1 P1 | 13.647 | +HCOO |
| X | PC(20:0e/16:0) | PC | 20:0e/16:0 | 36:0e | 775.6455 | C44 H90 O7 N1 P1 | 16.059 | +H    |
| * | PC(20:0e/18:1) | PC | 20:0e/18:1 | 38:1e | 801.6611 | C46 H92 O7 N1 P1 | 16.118 | +H    |
| X | PC(20:0e/18:2) | PC | 20:0e/18:2 | 38:2e | 799.6455 | C46 H90 O7 N1 P1 | 15.102 | +H    |
| * | PC(20:1/18:1)  | PC | 20:1/18:1  | 38:2  | 813.6248 | C46 H88 O8 N1 P1 | 13.651 | +H    |
| X | PC(20:1/18:2)  | PC | 20:1/18:2  | 38:3  | 811.6091 | C46 H86 O8 N1 P1 | 12.501 | +H    |
| X | PC(20:1/22:6)  | PC | 20:1/22:6  | 42:7  | 859.6091 | C50 H86 O8 N1 P1 | 11.919 | +H    |
| X | PC(20:2/18:2)  | PC | 20:2/18:2  | 38:4  | 809.5935 | C46 H84 O8 N1 P1 | 11.292 | +H    |
| X | PC(20:2/20:3)  | PC | 20:2/20:3  | 40:5  | 835.6091 | C48 H86 O8 N1 P1 | 11.695 | +H    |
| X | PC(20:2/22:5)  | PC | 20:2/22:5  | 42:7  | 859.6091 | C50 H86 O8 N1 P1 | 11.191 | +H    |
| X | PC(20:2/22:6)  | PC | 20:2/22:6  | 42:8  | 857.5935 | C50 H84 O8 N1 P1 | 10.701 | +H    |
| X | PC(20:3/18:2)  | PC | 20:3/18:2  | 38:5  | 807.5778 | C46 H82 O8 N1 P1 | 10.334 | +H    |
| * | PC(20:3/21:0)  | PC | 20:3/21:0  | 41:3  | 853.6561 | C49 H92 O8 N1 P1 | 16.936 | +H    |
| X | PC(20:3/22:5)  | PC | 20:3/22:5  | 42:8  | 857.5935 | C50 H84 O8 N1 P1 | 10.604 | +H    |
| X | PC(20:4/22:6)  | PC | 20:4/22:6  | 42:10 | 853.5622 | C50 H80 O8 N1 P1 | 9.157  | +H    |
| X | PC(22:0/18:2)  | PC | 22:0/18:2  | 40:2  | 841.6561 | C48 H92 O8 N1 P1 | 15.622 | +H    |
| X | PC(22:0/20:4)  | PC | 22:0/20:4  | 42:4  | 865.6561 | C50 H92 O8 N1 P1 | 15.491 | +H    |



|   |                |    |            |       |          |                  |        |    |
|---|----------------|----|------------|-------|----------|------------------|--------|----|
| X | PC(22:5/18:2)  | PC | 22:5/18:2  | 40:7  | 831.5778 | C48 H82 O8 N1 P1 | 10.308 | +H |
| X | PC(24:0/18:2)  | PC | 24:0/18:2  | 42:2  | 869.6874 | C50 H96 O8 N1 P1 | 16.808 | +H |
| X | PC(24:0/20:4)  | PC | 24:0/20:4  | 44:4  | 893.6874 | C52 H96 O8 N1 P1 | 16.675 | +H |
| X | PC(24:1/18:2)  | PC | 24:1/18:2  | 42:3  | 867.6717 | C50 H94 O8 N1 P1 | 15.443 | +H |
| X | PE(15:0/18:2)  | PE | 15:0/18:2  | 33:2  | 701.4996 | C38 H72 O8 N1 P1 | 10.566 | +H |
| * | PE(15:0/22:6)  | PE | 15:0/22:6  | 37:6  | 749.4996 | C42 H72 O8 N1 P1 | 9.986  | -H |
| * | PE(16:0/16:0)  | PE | 16:0/16:0  | 32:0  | 691.5152 | C37 H74 O8 N1 P1 | 10.92  | +H |
| X | PE(16:0/16:0)  | PE | 16:0/16:0  | 32:0  | 691.5152 | C37 H74 O8 N1 P1 | 12.414 | +H |
| X | PE(16:0/18:1)  | PE | 16:0/18:1  | 34:1  | 717.5309 | C39 H76 O8 N1 P1 | 12.529 | +H |
| * | PE(16:0/18:2)  | PE | 16:0/18:2  | 34:2  | 715.5152 | C39 H74 O8 N1 P1 | 9.959  | -H |
| X | PE(16:0/18:2)  | PE | 16:0/18:2  | 34:2  | 715.5152 | C39 H74 O8 N1 P1 | 11.367 | +H |
| X | PE(16:0/18:3)  | PE | 16:0/18:3  | 34:3  | 713.4996 | C39 H72 O8 N1 P1 | 10.358 | +H |
| * | PE(16:0/20:4)  | PE | 16:0/20:4  | 36:4  | 739.5152 | C41 H74 O8 N1 P1 | 9.772  | -H |
| * | PE(16:0/20:4)  | PE | 16:0/20:4  | 36:4  | 739.5152 | C41 H74 O8 N1 P1 | 11.156 | +H |
| X | PE(16:0/20:4)  | PE | 16:0/20:4  | 36:4  | 739.5152 | C41 H74 O8 N1 P1 | 11.268 | +H |
| * | PE(16:0/22:4)  | PE | 16:0/22:4  | 38:4  | 767.5465 | C43 H78 O8 N1 P1 | 12.218 | +H |
| * | PE(16:0/22:5)  | PE | 16:0/22:5  | 38:5  | 765.5309 | C43 H76 O8 N1 P1 | 11.253 | +H |
| * | PE(16:0/22:5)  | PE | 16:0/22:5  | 38:5  | 765.5309 | C43 H76 O8 N1 P1 | 11.767 | -H |
| * | PE(16:0/22:6)  | PE | 16:0/22:6  | 38:6  | 763.5152 | C43 H74 O8 N1 P1 | 9.422  | -H |
| X | PE(16:0/22:6)  | PE | 16:0/22:6  | 38:6  | 763.5152 | C43 H74 O8 N1 P1 | 10.78  | +H |
| * | PE(16:0e/16:0) | PE | 16:0e/16:0 | 32:0e | 677.5359 | C37 H76 O7 N1 P1 | 13.462 | -H |
| * | PE(16:0e/22:4) | PE | 16:0e/22:4 | 38:4e | 753.5672 | C43 H80 O7 N1 P1 | 13.232 | -H |
| * | PE(16:0e/22:6) | PE | 16:0e/22:6 | 38:6e | 749.5359 | C43 H76 O7 N1 P1 | 11.753 | -H |
| * | PE(16:0p/16:0) | PE | 16:0p/16:0 | 32:0p | 675.5203 | C37 H74 O7 N1 P1 | 13.247 | +H |
| * | PE(16:0p/18:0) | PE | 16:0p/18:0 | 34:0p | 703.5516 | C39 H78 O7 N1 P1 | 13.523 | +H |
| X | PE(16:0p/18:2) | PE | 16:0p/18:2 | 34:2p | 699.5203 | C39 H74 O7 N1 P1 | 12.366 | +H |
| * | PE(16:0p/18:3) | PE | 16:0p/18:3 | 34:3p | 697.5046 | C39 H72 O7 N1 P1 | 11.119 | +H |
| X | PE(16:0p/20:3) | PE | 16:0p/20:3 | 36:3p | 725.5359 | C41 H76 O7 N1 P1 | 12.538 | -H |
| X | PE(16:0p/20:4) | PE | 16:0p/20:4 | 36:4p | 723.5203 | C41 H74 O7 N1 P1 | 11.893 | +H |
| * | PE(16:0p/20:5) | PE | 16:0p/20:5 | 36:5p | 721.5046 | C41 H72 O7 N1 P1 | 10.894 | +H |

|   |                |    |            |       |          |                  |        |    |
|---|----------------|----|------------|-------|----------|------------------|--------|----|
| X | PE(16:0p/22:4) | PE | 16:0p/22:4 | 38:4p | 751.5516 | C43 H78 O7 N1 P1 | 12.978 | +H |
| X | PE(16:0p/22:5) | PE | 16:0p/22:5 | 38:5p | 749.5359 | C43 H76 O7 N1 P1 | 12.492 | -H |
| X | PE(16:0p/22:6) | PE | 16:0p/22:6 | 38:6p | 747.5203 | C43 H74 O7 N1 P1 | 11.489 | +H |
| X | PE(17:0/18:2)  | PE | 17:0/18:2  | 35:2  | 729.5309 | C40 H76 O8 N1 P1 | 12.17  | +H |
| X | PE(17:0/20:4)  | PE | 17:0/20:4  | 37:4  | 753.5309 | C42 H76 O8 N1 P1 | 11.957 | -H |
| X | PE(18:0/16:0)  | PE | 18:0/16:0  | 34:0  | 719.5465 | C39 H78 O8 N1 P1 | 13.974 | +H |
| X | PE(18:0/18:1)  | PE | 18:0/18:1  | 36:1  | 745.5622 | C41 H80 O8 N1 P1 | 14.099 | -H |
| X | PE(18:0/18:2)  | PE | 18:0/18:2  | 36:2  | 743.5465 | C41 H78 O8 N1 P1 | 12.97  | +H |
| * | PE(18:0/18:3)  | PE | 18:0/18:3  | 36:3  | 741.5309 | C41 H76 O8 N1 P1 | 11.969 | +H |
| * | PE(18:0/20:2)  | PE | 18:0/20:2  | 38:2  | 771.5778 | C43 H82 O8 N1 P1 | 14.282 | +H |
| X | PE(18:0/20:3)  | PE | 18:0/20:3  | 38:3  | 769.5622 | C43 H80 O8 N1 P1 | 13.352 | +H |
| * | PE(18:0/20:3)  | PE | 18:0/20:3  | 38:3  | 769.5622 | C43 H80 O8 N1 P1 | 13.508 | +H |
| X | PE(18:0/20:4)  | PE | 18:0/20:4  | 38:4  | 767.5465 | C43 H78 O8 N1 P1 | 12.753 | +H |
| X | PE(18:0/22:4)  | PE | 18:0/22:4  | 40:4  | 795.5778 | C45 H82 O8 N1 P1 | 13.776 | +H |
| * | PE(18:0/22:5)  | PE | 18:0/22:5  | 40:5  | 793.5622 | C45 H80 O8 N1 P1 | 13.328 | +H |
| X | PE(18:0/22:6)  | PE | 18:0/22:6  | 40:6  | 791.5465 | C45 H78 O8 N1 P1 | 12.373 | -H |
| * | PE(18:0e/16:0) | PE | 18:0e/16:0 | 34:0e | 705.5672 | C39 H80 O7 N1 P1 | 15.008 | -H |
| * | PE(18:0e/18:1) | PE | 18:0e/18:1 | 36:1e | 731.5829 | C41 H82 O7 N1 P1 | 15.117 | -H |
| * | PE(18:0e/20:3) | PE | 18:0e/20:3 | 38:3e | 755.5829 | C43 H82 O7 N1 P1 | 14.36  | -H |
| * | PE(18:0e/20:4) | PE | 18:0e/20:4 | 38:4e | 753.5672 | C43 H80 O7 N1 P1 | 13.767 | -H |
| * | PE(18:0e/22:5) | PE | 18:0e/22:5 | 40:5e | 779.5829 | C45 H82 O7 N1 P1 | 13.824 | -H |
| * | PE(18:0e/22:6) | PE | 18:0e/22:6 | 40:6e | 777.5672 | C45 H80 O7 N1 P1 | 13.368 | -H |
| X | PE(18:0p/16:0) | PE | 18:0p/16:0 | 34:0p | 703.5516 | C39 H78 O7 N1 P1 | 14.785 | +H |
| * | PE(18:0p/18:1) | PE | 18:0p/18:1 | 36:1p | 729.5672 | C41 H80 O7 N1 P1 | 14.873 | +H |
| X | PE(18:0p/18:2) | PE | 18:0p/18:2 | 36:2p | 727.5516 | C41 H78 O7 N1 P1 | 13.741 | +H |
| * | PE(18:0p/18:3) | PE | 18:0p/18:3 | 36:3p | 725.5359 | C41 H76 O7 N1 P1 | 12.731 | +H |
| * | PE(18:0p/20:1) | PE | 18:0p/20:1 | 38:1p | 757.5985 | C43 H84 O7 N1 P1 | 16.099 | +H |
| * | PE(18:0p/20:3) | PE | 18:0p/20:3 | 38:3p | 753.5672 | C43 H80 O7 N1 P1 | 14.097 | +H |
| X | PE(18:0p/20:3) | PE | 18:0p/20:3 | 38:3p | 753.5672 | C43 H80 O7 N1 P1 | 14.277 | +H |
| * | PE(18:0p/20:4) | PE | 18:0p/20:4 | 38:4p | 751.5516 | C43 H78 O7 N1 P1 | 12.223 | -H |

|   |                |    |            |       |          |                  |        |    |
|---|----------------|----|------------|-------|----------|------------------|--------|----|
| X | PE(18:0p/20:4) | PE | 18:0p/20:4 | 38:4p | 751.5516 | C43 H78 O7 N1 P1 | 13.49  | +H |
| * | PE(18:0p/22:4) | PE | 18:0p/22:4 | 40:4p | 779.5829 | C45 H82 O7 N1 P1 | 13.273 | -H |
| * | PE(18:0p/22:4) | PE | 18:0p/22:4 | 40:4p | 779.5829 | C45 H82 O7 N1 P1 | 14.361 | +H |
| * | PE(18:0p/22:4) | PE | 18:0p/22:4 | 40:4p | 779.5829 | C45 H82 O7 N1 P1 | 14.509 | +H |
| X | PE(18:0p/22:5) | PE | 18:0p/22:5 | 40:5p | 777.5672 | C45 H80 O7 N1 P1 | 13.556 | +H |
| * | PE(18:0p/22:5) | PE | 18:0p/22:5 | 40:5p | 777.5672 | C45 H80 O7 N1 P1 | 14.049 | +H |
| X | PE(18:0p/22:6) | PE | 18:0p/22:6 | 40:6p | 775.5516 | C45 H78 O7 N1 P1 | 13.088 | +H |
| X | PE(18:1/18:1)  | PE | 18:1/18:1  | 36:2  | 743.5465 | C41 H78 O8 N1 P1 | 12.664 | +H |
| X | PE(18:1/18:2)  | PE | 18:1/18:2  | 36:3  | 741.5309 | C41 H76 O8 N1 P1 | 11.483 | +H |
| * | PE(18:1/18:2)  | PE | 18:1/18:2  | 36:3  | 741.5309 | C41 H76 O8 N1 P1 | 11.73  | +H |
| * | PE(18:1/18:3)  | PE | 18:1/18:3  | 36:4  | 739.5152 | C41 H74 O8 N1 P1 | 10.475 | +H |
| X | PE(18:1/20:4)  | PE | 18:1/20:4  | 38:5  | 765.5309 | C43 H76 O8 N1 P1 | 11.077 | -H |
| * | PE(18:1/22:0)  | PE | 18:1/22:0  | 40:1  | 801.6248 | C45 H88 O8 N1 P1 | 16.754 | +H |
| X | PE(18:1/22:6)  | PE | 18:1/22:6  | 40:7  | 789.5309 | C45 H76 O8 N1 P1 | 10.887 | +H |
| * | PE(18:1/24:0)  | PE | 18:1/24:0  | 42:1  | 829.6561 | C47 H92 O8 N1 P1 | 17.672 | +H |
| X | PE(18:1p/16:0) | PE | 18:1p/16:0 | 34:1p | 701.5359 | C39 H76 O7 N1 P1 | 13.338 | +H |
| X | PE(18:1p/18:1) | PE | 18:1p/18:1 | 36:2p | 727.5516 | C41 H78 O7 N1 P1 | 13.423 | +H |
| X | PE(18:1p/18:2) | PE | 18:1p/18:2 | 36:3p | 725.5359 | C41 H76 O7 N1 P1 | 12.171 | +H |
| * | PE(18:1p/20:4) | PE | 18:1p/20:4 | 38:5p | 749.5359 | C43 H76 O7 N1 P1 | 10.981 | -H |
| X | PE(18:1p/20:4) | PE | 18:1p/20:4 | 38:5p | 749.5359 | C43 H76 O7 N1 P1 | 11.975 | -H |
| * | PE(18:1p/20:5) | PE | 18:1p/20:5 | 38:6p | 747.5203 | C43 H74 O7 N1 P1 | 10.995 | +H |
| X | PE(18:1p/22:4) | PE | 18:1p/22:4 | 40:5p | 777.5672 | C45 H80 O7 N1 P1 | 13.062 | -H |
| * | PE(18:1p/22:5) | PE | 18:1p/22:5 | 40:6p | 775.5516 | C45 H78 O7 N1 P1 | 12.064 | +H |
| * | PE(18:1p/22:5) | PE | 18:1p/22:5 | 40:6p | 775.5516 | C45 H78 O7 N1 P1 | 12.205 | -H |
| * | PE(18:1p/22:5) | PE | 18:1p/22:5 | 40:6p | 775.5516 | C45 H78 O7 N1 P1 | 12.579 | +H |
| X | PE(18:1p/22:6) | PE | 18:1p/22:6 | 40:7p | 773.5359 | C45 H76 O7 N1 P1 | 11.585 | +H |
| X | PE(18:2/18:2)  | PE | 18:2/18:2  | 36:4  | 739.5152 | C41 H74 O8 N1 P1 | 10.289 | +H |
| X | PE(18:2/20:4)  | PE | 18:2/20:4  | 38:6  | 763.5152 | C43 H74 O8 N1 P1 | 10.073 | +H |
| * | PE(18:2/22:6)  | PE | 18:2/22:6  | 40:8  | 787.5152 | C45 H74 O8 N1 P1 | 9.771  | +H |
| * | PE(18:2p/16:0) | PE | 18:2p/16:0 | 34:2p | 699.5203 | C39 H74 O7 N1 P1 | 12.148 | +H |

|   |                |    |            |       |          |                  |        |    |
|---|----------------|----|------------|-------|----------|------------------|--------|----|
| X | PE(18:2p/20:4) | PE | 18:2p/20:4 | 38:6p | 747.5203 | C43 H74 O7 N1 P1 | 10.786 | +H |
| * | PE(18:2p/22:4) | PE | 18:2p/22:4 | 40:6p | 775.5516 | C45 H78 O7 N1 P1 | 11.877 | +H |
| * | PE(18:2p/22:5) | PE | 18:2p/22:5 | 40:7p | 773.5359 | C45 H76 O7 N1 P1 | 10.882 | +H |
| * | PE(18:2p/22:6) | PE | 18:2p/22:6 | 40:8p | 771.5203 | C45 H74 O7 N1 P1 | 10.39  | +H |
| X | PE(18:3/18:2)  | PE | 18:3/18:2  | 36:5  | 737.4996 | C41 H72 O8 N1 P1 | 9.296  | -H |
| * | PE(19:0/18:2)  | PE | 19:0/18:2  | 37:2  | 757.5622 | C42 H80 O8 N1 P1 | 13.431 | +H |
| * | PE(19:0/20:4)  | PE | 19:0/20:4  | 39:4  | 781.5622 | C44 H80 O8 N1 P1 | 13.519 | +H |
| * | PE(20:0/18:2)  | PE | 20:0/18:2  | 38:2  | 771.5778 | C43 H82 O8 N1 P1 | 14.515 | +H |
| * | PE(20:0/20:4)  | PE | 20:0/20:4  | 40:4  | 795.5778 | C45 H82 O8 N1 P1 | 14.301 | +H |
| * | PE(20:0e/20:4) | PE | 20:0e/20:4 | 40:4e | 781.5985 | C45 H84 O7 N1 P1 | 15.284 | -H |
| * | PE(20:0e/22:5) | PE | 20:0e/22:5 | 42:5e | 807.6142 | C47 H86 O7 N1 P1 | 15.781 | -H |
| * | PE(20:0e/22:6) | PE | 20:0e/22:6 | 42:6e | 805.5985 | C47 H84 O7 N1 P1 | 14.901 | -H |
| X | PE(20:0p/16:0) | PE | 20:0p/16:0 | 36:0p | 731.5829 | C41 H82 O7 N1 P1 | 16.169 | +H |
| * | PE(20:0p/18:1) | PE | 20:0p/18:1 | 38:1p | 757.5985 | C43 H84 O7 N1 P1 | 16.228 | +H |
| X | PE(20:0p/18:2) | PE | 20:0p/18:2 | 38:2p | 755.5829 | C43 H82 O7 N1 P1 | 15.265 | +H |
| * | PE(20:0p/20:1) | PE | 20:0p/20:1 | 40:1p | 785.6298 | C45 H88 O7 N1 P1 | 17.265 | +H |
| * | PE(20:0p/20:2) | PE | 20:0p/20:2 | 40:2p | 783.6142 | C45 H86 O7 N1 P1 | 16.261 | +H |
| * | PE(20:0p/20:2) | PE | 20:0p/20:2 | 40:2p | 783.6142 | C45 H86 O7 N1 P1 | 16.547 | +H |
| * | PE(20:0p/20:3) | PE | 20:0p/20:3 | 40:3p | 781.5985 | C45 H84 O7 N1 P1 | 15.573 | +H |
| X | PE(20:0p/20:4) | PE | 20:0p/20:4 | 40:4p | 779.5829 | C45 H82 O7 N1 P1 | 15.016 | +H |
| * | PE(20:0p/22:4) | PE | 20:0p/22:4 | 42:4p | 807.6142 | C47 H86 O7 N1 P1 | 15.924 | -H |
| X | PE(20:0p/22:5) | PE | 20:0p/22:5 | 42:5p | 805.5985 | C47 H84 O7 N1 P1 | 15.062 | +H |
| * | PE(20:0p/22:5) | PE | 20:0p/22:5 | 42:5p | 805.5985 | C47 H84 O7 N1 P1 | 15.525 | +H |
| X | PE(20:0p/22:6) | PE | 20:0p/22:6 | 42:6p | 803.5829 | C47 H82 O7 N1 P1 | 14.634 | +H |
| * | PE(20:0p/22:6) | PE | 20:0p/22:6 | 42:6p | 803.5829 | C47 H82 O7 N1 P1 | 14.748 | +H |
| * | PE(20:1/18:2)  | PE | 20:1/18:2  | 38:3  | 769.5622 | C43 H80 O8 N1 P1 | 12.917 | -H |
| * | PE(20:1/20:4)  | PE | 20:1/20:4  | 40:5  | 793.5622 | C45 H80 O8 N1 P1 | 12.816 | +H |
| * | PE(20:1p/18:2) | PE | 20:1p/18:2 | 38:3p | 753.5672 | C43 H80 O7 N1 P1 | 13.624 | +H |
| * | PE(20:1p/20:4) | PE | 20:1p/20:4 | 40:5p | 777.5672 | C45 H80 O7 N1 P1 | 13.366 | +H |
| * | PE(20:1p/22:4) | PE | 20:1p/22:4 | 42:5p | 805.5985 | C47 H84 O7 N1 P1 | 14.467 | +H |

|   |                |    |            |       |          |                   |        |    |
|---|----------------|----|------------|-------|----------|-------------------|--------|----|
| * | PE(20:1p/22:6) | PE | 20:1p/22:6 | 42:7p | 801.5672 | C47 H80 O7 N1 P1  | 13.039 | +H |
| X | PE(20:2/18:2)  | PE | 20:2/18:2  | 38:4  | 767.5465 | C43 H78 O8 N1 P1  | 11.698 | -H |
| * | PE(20:2/20:4)  | PE | 20:2/20:4  | 40:6  | 791.5465 | C45 H78 O8 N1 P1  | 11.481 | +H |
| * | PE(20:3/18:2)  | PE | 20:3/18:2  | 38:5  | 765.5309 | C43 H76 O8 N1 P1  | 10.674 | -H |
| * | PE(22:0/18:2)  | PE | 22:0/18:2  | 40:2  | 799.6091 | C45 H86 O8 N1 P1  | 15.936 | +H |
| * | PE(24:0/18:2)  | PE | 24:0/18:2  | 42:2  | 827.6404 | C47 H90 O8 N1 P1  | 17.042 | +H |
| * | PE(24:0/20:4)  | PE | 24:0/20:4  | 44:4  | 851.6404 | C49 H90 O8 N1 P1  | 16.889 | +H |
| * | PI(15:0,18:2)  | PI | 15:0/18:2  | 33:2  | 820.5102 | C42 H77 O13 N0 P1 | 9.371  | -H |
| * | PI(15:0,20:4)  | PI | 15:0/20:4  | 35:4  | 844.5102 | C44 H77 O13 N0 P1 | 9.216  | -H |
| X | PI(16:0,16:0)  | PI | 16:0/16:0  | 32:0  | 810.5258 | C41 H79 O13 N0 P1 | 11.108 | -H |
| X | PI(16:0,18:1)  | PI | 16:0/18:1  | 34:1  | 836.5415 | C43 H81 O13 N0 P1 | 11.266 | -H |
| X | PI(16:0,18:2)  | PI | 16:0/18:2  | 34:2  | 834.5258 | C43 H79 O13 N0 P1 | 10.118 | -H |
| * | PI(16:0,18:3)  | PI | 16:0/18:3  | 34:3  | 832.5102 | C43 H77 O13 N0 P1 | 9.413  | -H |
| * | PI(16:0,20:3)  | PI | 16:0/20:3  | 36:3  | 860.5415 | C45 H81 O13 N0 P1 | 10.721 | -H |
| X | PI(16:0,20:4)  | PI | 16:0/20:4  | 36:4  | 858.5258 | C45 H79 O13 N0 P1 | 9.949  | -H |
| * | PI(16:0,20:5)  | PI | 16:0/20:5  | 36:5  | 856.5102 | C45 H77 O13 N0 P1 | 9.044  | -H |
| * | PI(16:0,22:5)  | PI | 16:0/22:5  | 38:5  | 884.5415 | C47 H81 O13 N0 P1 | 10.574 | -H |
| X | PI(16:0,22:6)  | PI | 16:0/22:6  | 38:6  | 882.5258 | C47 H79 O13 N0 P1 | 9.623  | -H |
| * | PI(17:0,18:2)  | PI | 17:0/18:2  | 35:2  | 848.5415 | C44 H81 O13 N0 P1 | 10.905 | -H |
| * | PI(17:0,20:3)  | PI | 17:0/20:3  | 37:3  | 874.5571 | C46 H83 O13 N0 P1 | 11.281 | -H |
| * | PI(17:0,20:4)  | PI | 17:0/20:4  | 37:4  | 872.5415 | C46 H81 O13 N0 P1 | 10.738 | -H |
| * | PI(17:0,22:6)  | PI | 17:0/22:6  | 39:6  | 896.5415 | C48 H81 O13 N0 P1 | 10.376 | -H |
| X | PI(18:0,18:2)  | PI | 18:0/18:2  | 36:2  | 862.5571 | C45 H83 O13 N0 P1 | 11.672 | -H |
| * | PI(18:0,18:3)  | PI | 18:0/18:3  | 36:3  | 860.5415 | C45 H81 O13 N0 P1 | 10.959 | -H |
| X | PI(18:0,20:2)  | PI | 18:0/20:2  | 38:2  | 890.5884 | C47 H87 O13 N0 P1 | 12.983 | -H |
| X | PI(18:0,20:3)  | PI | 18:0/20:3  | 38:3  | 888.5728 | C47 H85 O13 N0 P1 | 12.079 | -H |
| * | PI(18:0,20:3)  | PI | 18:0/20:3  | 38:3  | 888.5728 | C47 H85 O13 N0 P1 | 12.582 | -H |
| X | PI(18:0,20:4)  | PI | 18:0/20:4  | 38:4  | 886.5571 | C47 H83 O13 N0 P1 | 11.474 | -H |
| X | PI(18:0,20:5)  | PI | 18:0/20:5  | 38:5  | 884.5415 | C47 H81 O13 N0 P1 | 11.15  | -H |
| X | PI(18:0,22:4)  | PI | 18:0/22:4  | 40:4  | 914.5884 | C49 H87 O13 N0 P1 | 12.524 | -H |

|   |                |    |            |       |          |                   |        |    |
|---|----------------|----|------------|-------|----------|-------------------|--------|----|
| * | PI(18:0,22:5)  | PI | 18:0/22:5  | 40:5  | 912.5728 | C49 H85 O13 N0 P1 | 11.561 | -H |
| * | PI(18:0,22:5)  | PI | 18:0/22:5  | 40:5  | 912.5728 | C49 H85 O13 N0 P1 | 12.097 | -H |
| X | PI(18:0,22:6)  | PI | 18:0/22:6  | 40:6  | 910.5571 | C49 H83 O13 N0 P1 | 11.15  | -H |
| * | PI(18:0p,20:4) | PI | 18:0p/20:4 | 38:4p | 870.5622 | C47 H83 O12 N0 P1 | 10.868 | -H |
| X | PI(18:1,18:1)  | PI | 18:1/18:1  | 36:2  | 862.5571 | C45 H83 O13 N0 P1 | 11.372 | -H |
| X | PI(18:1,18:2)  | PI | 18:1/18:2  | 36:3  | 860.5415 | C45 H81 O13 N0 P1 | 10.257 | -H |
| * | PI(18:1,18:2)  | PI | 18:1/18:2  | 36:3  | 860.5415 | C45 H81 O13 N0 P1 | 10.522 | -H |
| X | PI(18:1,20:4)  | PI | 18:1/20:4  | 38:5  | 884.5415 | C47 H81 O13 N0 P1 | 10.065 | -H |
| * | PI(18:1,20:4)  | PI | 18:1/20:4  | 38:05 | 884.5415 | C47 H81 O13 N0 P1 | 10.32  | -H |
| * | PI(18:1,20:4)  | PI | 18:1/20:4  | 38:5  | 884.5415 | C47 H81 O13 N0 P1 | 11.439 | -H |
| * | PI(18:1,22:5)  | PI | 18:1/22:5  | 40:6  | 910.5571 | C49 H83 O13 N0 P1 | 10.154 | -H |
| * | PI(18:2,18:2)  | PI | 18:2/18:2  | 36:4  | 858.5258 | C45 H79 O13 N0 P1 | 9.144  | -H |
| * | PI(18:2,20:4)  | PI | 18:2/20:4  | 38:6  | 882.5258 | C47 H79 O13 N0 P1 | 8.988  | -H |
| * | PI(18:3,18:2)  | PI | 18:3/18:2  | 36:5  | 856.5102 | C45 H77 O13 N0 P1 | 8.238  | -H |
| * | PI(20:0,20:4)  | PI | 20:0/20:4  | 40:04 | 914.5884 | C49 H87 O13 N0 P1 | 13.067 | -H |
| * | PI(20:1,20:4)  | PI | 20:1/20:4  | 40:5  | 912.5728 | C49 H85 O13 N0 P1 | 11.393 | -H |
| * | PS(16:0,20:4)  | PS | 16:0/20:4  | 36:4  | 783.505  | C42 H74 O10 N1 P1 | 10.081 | -H |
| X | PS(18:0,18:1)  | PS | 18:0/18:1  | 36:1  | 789.552  | C42 H80 O10 N1 P1 | 12.969 | +H |
| X | PS(18:0,18:2)  | PS | 18:0/18:2  | 36:2  | 787.5363 | C42 H78 O10 N1 P1 | 11.826 | +H |
| X | PS(18:0,20:4)  | PS | 18:0/20:4  | 38:4  | 811.5363 | C44 H78 O10 N1 P1 | 11.626 | +H |
| * | PS(18:0,22:6)  | PS | 18:0/22:6  | 40:6  | 835.5363 | C46 H78 O10 N1 P1 | 11.274 | -H |
| * | PS(18:1,20:4)  | PS | 18:1/20:4  | 38:5  | 809.5207 | C44 H76 O10 N1 P1 | 10.205 | -H |
| * | PS(18:2,20:4)  | PS | 18:2/20:4  | 38:6  | 807.505  | C44 H74 O10 N1 P1 | 9.083  | -H |
| X | PS(20:4,20:4)  | PS | 20:4/20:4  | 40:8  | 831.505  | C46 H74 O10 N1 P1 | 8.833  | +H |
| * | PS(20:4,22:6)  | PS | 20:4/22:6  | 42:10 | 855.505  | C48 H74 O10 N1 P1 | 8.504  | -H |
| * | SM(d18:1/20:4) | SM | d18:1/20:4 | d38:5 | 750.5676 | C43 H79 O6 N2 P1  | 10.666 | +H |
| * | SM(d18:1/20:4) | SM | d18:1/20:4 | d38:5 | 750.5676 | C43 H79 O6 N2 P1  | 10.666 | +H |
| X | SM(d18:1/24:2) | SM | d42:3      | d42:3 | 810.6615 | C47 H91 O6 N2 P1  | 13.771 | +H |
| * | SM(d28:0)      | SM | d28:0      | d28:0 | 620.4893 | C33 H69 O6 N2 P1  | 6.633  | +H |
| X | SM(d28:1)      | SM | d28:1      | d28:1 | 618.4737 | C33 H67 O6 N2 P1  | 5.957  | +H |

|   |           |    |       |       |          |                  |        |    |
|---|-----------|----|-------|-------|----------|------------------|--------|----|
| X | SM(d30:1) | SM | d30:1 | d30:1 | 646.505  | C35 H71 O6 N2 P1 | 7.372  | +H |
| X | SM(d31:1) | SM | d31:1 | d31:1 | 660.5206 | C36 H73 O6 N2 P1 | 8.037  | +H |
| * | SM(d32:0) | SM | d32:0 | d32:0 | 676.5519 | C37 H77 O6 N2 P1 | 9.381  | +H |
| X | SM(d32:1) | SM | d32:1 | d32:1 | 674.5363 | C37 H75 O6 N2 P1 | 8.789  | +H |
| X | SM(d32:2) | SM | d32:2 | d32:2 | 672.5206 | C37 H73 O6 N2 P1 | 7.557  | +H |
| * | SM(d32:2) | SM | d32:2 | d32:2 | 672.5206 | C37 H73 O6 N2 P1 | 7.741  | +H |
| X | SM(d33:0) | SM | d33:0 | d33:0 | 690.5676 | C38 H79 O6 N2 P1 | 10.175 | +H |
| * | SM(d33:1) | SM | d33:1 | d33:1 | 688.5519 | C38 H77 O6 N2 P1 | 9.329  | +H |
| X | SM(d33:1) | SM | d33:1 | d33:1 | 688.5519 | C38 H77 O6 N2 P1 | 9.569  | +H |
| X | SM(d33:2) | SM | d33:2 | d33:2 | 686.5363 | C38 H75 O6 N2 P1 | 8.274  | +H |
| * | SM(d33:2) | SM | d33:2 | d33:2 | 686.5363 | C38 H75 O6 N2 P1 | 8.859  | +H |
| X | SM(d34:0) | SM | d34:0 | d34:0 | 704.5832 | C39 H81 O6 N2 P1 | 10.978 | +H |
| X | SM(d34:1) | SM | d34:1 | d34:1 | 702.5676 | C39 H79 O6 N2 P1 | 1.584  | +H |
| X | SM(d34:1) | SM | d34:1 | d34:1 | 702.5676 | C39 H79 O6 N2 P1 | 10.125 | +H |
| X | SM(d34:1) | SM | d34:1 | d34:1 | 702.5676 | C39 H79 O6 N2 P1 | 10.37  | +H |
| X | SM(d34:2) | SM | d34:2 | d34:2 | 700.5519 | C39 H77 O6 N2 P1 | 8.908  | +H |
| X | SM(d34:2) | SM | d34:2 | d34:2 | 700.5519 | C39 H77 O6 N2 P1 | 9.044  | +H |
| X | SM(d34:2) | SM | d34:2 | d34:2 | 700.5519 | C39 H77 O6 N2 P1 | 9.25   | +H |
| * | SM(d34:2) | SM | d34:2 | d34:2 | 700.5519 | C39 H77 O6 N2 P1 | 10.392 | +H |
| * | SM(d34:3) | SM | d34:3 | d34:3 | 698.5363 | C39 H75 O6 N2 P1 | 8.104  | +H |
| * | SM(d35:0) | SM | d35:0 | d35:0 | 718.5989 | C40 H83 O6 N2 P1 | 11.813 | +H |
| X | SM(d35:1) | SM | d35:1 | d35:1 | 716.5832 | C40 H81 O6 N2 P1 | 10.917 | +H |
| X | SM(d35:1) | SM | d35:1 | d35:1 | 716.5832 | C40 H81 O6 N2 P1 | 11.193 | +H |
| X | SM(d35:2) | SM | d35:2 | d35:2 | 714.5676 | C40 H79 O6 N2 P1 | 9.857  | +H |
| * | SM(d35:2) | SM | d35:2 | d35:2 | 714.5676 | C40 H79 O6 N2 P1 | 10.063 | +H |
| X | SM(d36:0) | SM | d36:0 | d36:0 | 732.6145 | C41 H85 O6 N2 P1 | 12.623 | +H |
| * | SM(d36:1) | SM | d36:1 | d36:1 | 730.5989 | C41 H83 O6 N2 P1 | 11.246 | +H |
| * | SM(d36:1) | SM | d36:1 | d36:1 | 730.5989 | C41 H83 O6 N2 P1 | 11.754 | +H |
| X | SM(d36:1) | SM | d36:1 | d36:1 | 730.5989 | C41 H83 O6 N2 P1 | 12.021 | +H |
| * | SM(d36:2) | SM | d36:2 | d36:2 | 728.5832 | C41 H81 O6 N2 P1 | 10.041 | +H |

|   |           |    |       |       |          |                  |        |    |
|---|-----------|----|-------|-------|----------|------------------|--------|----|
| X | SM(d36:2) | SM | d36:2 | d36:2 | 728.5832 | C41 H81 O6 N2 P1 | 10.675 | +H |
| * | SM(d36:2) | SM | d36:2 | d36:2 | 728.5832 | C41 H81 O6 N2 P1 | 10.932 | +H |
| * | SM(d36:2) | SM | d36:2 | d36:2 | 728.5832 | C41 H81 O6 N2 P1 | 11.705 | +H |
| X | SM(d36:3) | SM | d36:3 | d36:3 | 726.5676 | C41 H79 O6 N2 P1 | 9.437  | +H |
| * | SM(d36:3) | SM | d36:3 | d36:3 | 726.5676 | C41 H79 O6 N2 P1 | 9.689  | +H |
| * | SM(d36:3) | SM | d36:3 | d36:3 | 726.5676 | C41 H79 O6 N2 P1 | 10.057 | +H |
| * | SM(d36:4) | SM | d36:4 | d36:4 | 724.5519 | C41 H77 O6 N2 P1 | 8.174  | +H |
| * | SM(d36:4) | SM | d36:4 | d36:4 | 724.5519 | C41 H77 O6 N2 P1 | 8.451  | +H |
| * | SM(d36:4) | SM | d36:4 | d36:4 | 724.5519 | C41 H77 O6 N2 P1 | 8.659  | +H |
| * | SM(d36:5) | SM | d36:5 | d36:5 | 722.5363 | C41 H75 O6 N2 P1 | 9.251  | +H |
| * | SM(d37:1) | SM | d37:1 | d37:1 | 744.6145 | C42 H85 O6 N2 P1 | 12.538 | +H |
| X | SM(d37:1) | SM | d37:1 | d37:1 | 744.6145 | C42 H85 O6 N2 P1 | 12.864 | +H |
| * | SM(d37:2) | SM | d37:2 | d37:2 | 742.5989 | C42 H83 O6 N2 P1 | 11.516 | +H |
| * | SM(d37:3) | SM | d37:3 | d37:3 | 740.5832 | C42 H81 O6 N2 P1 | 10.018 | +H |
| * | SM(d37:5) | SM | d37:5 | d37:5 | 736.5519 | C42 H77 O6 N2 P1 | 9.859  | +H |
| X | SM(d38:0) | SM | d38:0 | d38:0 | 760.6458 | C43 H89 O6 N2 P1 | 14.229 | +H |
| X | SM(d38:1) | SM | d38:1 | d38:1 | 758.6302 | C43 H87 O6 N2 P1 | 13.381 | +H |
| X | SM(d38:1) | SM | d38:1 | d38:1 | 758.6302 | C43 H87 O6 N2 P1 | 13.649 | +H |
| * | SM(d38:2) | SM | d38:2 | d38:2 | 756.6145 | C43 H85 O6 N2 P1 | 11.439 | +H |
| X | SM(d38:2) | SM | d38:2 | d38:2 | 756.6145 | C43 H85 O6 N2 P1 | 12.054 | +H |
| X | SM(d38:2) | SM | d38:2 | d38:2 | 756.6145 | C43 H85 O6 N2 P1 | 12.349 | +H |
| X | SM(d38:3) | SM | d38:3 | d38:3 | 754.5989 | C43 H83 O6 N2 P1 | 10.816 | +H |
| * | SM(d38:4) | SM | d38:4 | d38:4 | 752.5832 | C43 H81 O6 N2 P1 | 9.505  | +H |
| * | SM(d38:4) | SM | d38:4 | d38:4 | 752.5832 | C43 H81 O6 N2 P1 | 9.784  | +H |
| * | SM(d39:1) | SM | d39:1 | d39:1 | 772.6458 | C44 H89 O6 N2 P1 | 14.078 | +H |
| X | SM(d39:1) | SM | d39:1 | d39:1 | 772.6458 | C44 H89 O6 N2 P1 | 14.482 | +H |
| * | SM(d39:2) | SM | d39:2 | d39:2 | 770.6302 | C44 H87 O6 N2 P1 | 12.805 | +H |
| * | SM(d39:2) | SM | d39:2 | d39:2 | 770.6302 | C44 H87 O6 N2 P1 | 13.189 | +H |
| * | SM(d39:3) | SM | d39:3 | d39:3 | 768.6145 | C44 H85 O6 N2 P1 | 11.513 | +H |
| X | SM(d40:0) | SM | d40:0 | d40:0 | 788.6771 | C45 H93 O6 N2 P1 | 15.734 | +H |



|   |           |    |       |       |          |                  |        |    |
|---|-----------|----|-------|-------|----------|------------------|--------|----|
| X | SM(d40:1) | SM | d40:1 | d40:1 | 786.6615 | C45 H91 O6 N2 P1 | 14.941 | +H |
| X | SM(d40:1) | SM | d40:1 | d40:1 | 786.6615 | C45 H91 O6 N2 P1 | 15.21  | +H |
| * | SM(d40:1) | SM | d40:1 | d40:1 | 786.6615 | C45 H91 O6 N2 P1 | 16.227 | +H |
| X | SM(d40:2) | SM | d40:2 | d40:2 | 784.6458 | C45 H89 O6 N2 P1 | 13.411 | +H |
| X | SM(d40:2) | SM | d40:2 | d40:2 | 784.6458 | C45 H89 O6 N2 P1 | 13.56  | +H |
| X | SM(d40:2) | SM | d40:2 | d40:2 | 784.6458 | C45 H89 O6 N2 P1 | 13.99  | +H |
| X | SM(d40:3) | SM | d40:3 | d40:3 | 782.6302 | C45 H87 O6 N2 P1 | 12.283 | +H |
| * | SM(d40:4) | SM | d40:4 | d40:4 | 780.6145 | C45 H85 O6 N2 P1 | 10.97  | +H |
| X | SM(d40:4) | SM | d40:4 | d40:4 | 780.6145 | C45 H85 O6 N2 P1 | 11.187 | +H |
| * | SM(d40:4) | SM | d40:4 | d40:4 | 780.6145 | C45 H85 O6 N2 P1 | 13.645 | +H |
| * | SM(d40:5) | SM | d40:5 | d40:5 | 778.5989 | C45 H83 O6 N2 P1 | 9.882  | +H |
| * | SM(d40:5) | SM | d40:5 | d40:5 | 778.5989 | C45 H83 O6 N2 P1 | 10.155 | +H |
| X | SM(d40:5) | SM | d40:5 | d40:5 | 778.5989 | C45 H83 O6 N2 P1 | 10.413 | +H |
| * | SM(d40:5) | SM | d40:5 | d40:5 | 778.5989 | C45 H83 O6 N2 P1 | 12.066 | +H |
| * | SM(d40:5) | SM | d40:5 | d40:5 | 778.5989 | C45 H83 O6 N2 P1 | 12.357 | +H |
| * | SM(d40:6) | SM | d40:6 | d40:6 | 776.5832 | C45 H81 O6 N2 P1 | 9.118  | +H |
| * | SM(d40:6) | SM | d40:6 | d40:6 | 776.5832 | C45 H81 O6 N2 P1 | 9.401  | +H |
| X | SM(d40:6) | SM | d40:6 | d40:6 | 776.5832 | C45 H81 O6 N2 P1 | 10.034 | +H |
| * | SM(d40:6) | SM | d40:6 | d40:6 | 776.5832 | C45 H81 O6 N2 P1 | 10.813 | +H |
| * | SM(d40:7) | SM | d40:7 | d40:7 | 774.5676 | C45 H79 O6 N2 P1 | 8.765  | +H |
| X | SM(d40:7) | SM | d40:7 | d40:7 | 774.5676 | C45 H79 O6 N2 P1 | 9.044  | +H |
| * | SM(d40:8) | SM | d40:8 | d40:8 | 772.5519 | C45 H77 O6 N2 P1 | 7.843  | +H |
| X | SM(d41:1) | SM | d41:1 | d41:1 | 800.6771 | C46 H93 O6 N2 P1 | 15.646 | +H |
| X | SM(d41:1) | SM | d41:1 | d41:1 | 800.6771 | C46 H93 O6 N2 P1 | 15.926 | +H |
| * | SM(d41:1) | SM | d41:1 | d41:1 | 800.6771 | C46 H93 O6 N2 P1 | 16.459 | +H |
| * | SM(d41:2) | SM | d41:2 | d41:2 | 798.6615 | C46 H91 O6 N2 P1 | 13.617 | +H |
| X | SM(d41:2) | SM | d41:2 | d41:2 | 798.6615 | C46 H91 O6 N2 P1 | 14.315 | +H |
| X | SM(d41:2) | SM | d41:2 | d41:2 | 798.6615 | C46 H91 O6 N2 P1 | 14.774 | +H |
| X | SM(d41:3) | SM | d41:3 | d41:3 | 796.6458 | C46 H89 O6 N2 P1 | 13.039 | +H |
| * | SM(d41:3) | SM | d41:3 | d41:3 | 796.6458 | C46 H89 O6 N2 P1 | 13.469 | +H |

|   |           |    |       |       |          |                  |        |    |
|---|-----------|----|-------|-------|----------|------------------|--------|----|
| * | SM(d41:4) | SM | d41:4 | d41:4 | 794.6302 | C46 H87 O6 N2 P1 | 14.47  | +H |
| * | SM(d41:5) | SM | d41:5 | d41:5 | 792.6145 | C46 H85 O6 N2 P1 | 10.82  | +H |
| * | SM(d41:6) | SM | d41:6 | d41:6 | 790.5989 | C46 H83 O6 N2 P1 | 10.163 | +H |
| X | SM(d42:1) | SM | d42:1 | d42:1 | 814.6928 | C47 H95 O6 N2 P1 | 16.323 | +H |
| X | SM(d42:1) | SM | d42:1 | d42:1 | 814.6928 | C47 H95 O6 N2 P1 | 16.518 | +H |
| * | SM(d42:1) | SM | d42:1 | d42:1 | 814.6928 | C47 H95 O6 N2 P1 | 19.846 | +H |
| * | SM(d42:1) | SM | d42:1 | d42:1 | 814.6928 | C47 H95 O6 N2 P1 | 25.383 | +H |
| X | SM(d42:2) | SM | d42:2 | d42:2 | 812.6771 | C47 H93 O6 N2 P1 | 14.352 | +H |
| X | SM(d42:2) | SM | d42:2 | d42:2 | 812.6771 | C47 H93 O6 N2 P1 | 15.009 | +H |
| X | SM(d42:2) | SM | d42:2 | d42:2 | 812.6771 | C47 H93 O6 N2 P1 | 15.524 | +H |
| * | SM(d42:2) | SM | d42:2 | d42:2 | 812.6771 | C47 H93 O6 N2 P1 | 16.691 | +H |
| X | SM(d42:4) | SM | d42:4 | d42:4 | 808.6458 | C47 H89 O6 N2 P1 | 12.506 | +H |
| X | SM(d42:4) | SM | d42:4 | d42:4 | 808.6458 | C47 H89 O6 N2 P1 | 12.713 | +H |
| * | SM(d42:4) | SM | d42:4 | d42:4 | 808.6458 | C47 H89 O6 N2 P1 | 13.734 | +H |
| * | SM(d42:4) | SM | d42:4 | d42:4 | 808.6458 | C47 H89 O6 N2 P1 | 14.908 | +H |
| * | SM(d42:4) | SM | d42:4 | d42:4 | 808.6458 | C47 H89 O6 N2 P1 | 15.19  | +H |
| * | SM(d42:5) | SM | d42:5 | d42:5 | 806.6302 | C47 H87 O6 N2 P1 | 11.268 | +H |
| * | SM(d42:5) | SM | d42:5 | d42:5 | 806.6302 | C47 H87 O6 N2 P1 | 11.426 | +H |
| X | SM(d42:5) | SM | d42:5 | d42:5 | 806.6302 | C47 H87 O6 N2 P1 | 11.585 | +H |
| * | SM(d42:5) | SM | d42:5 | d42:5 | 806.6302 | C47 H87 O6 N2 P1 | 11.764 | +H |
| * | SM(d42:5) | SM | d42:5 | d42:5 | 806.6302 | C47 H87 O6 N2 P1 | 13.551 | +H |
| * | SM(d42:5) | SM | d42:5 | d42:5 | 806.6302 | C47 H87 O6 N2 P1 | 14.002 | +H |
| * | SM(d42:6) | SM | d42:6 | d42:6 | 804.6145 | C47 H85 O6 N2 P1 | 10.287 | +H |
| * | SM(d42:6) | SM | d42:6 | d42:6 | 804.6145 | C47 H85 O6 N2 P1 | 10.461 | +H |
| X | SM(d42:6) | SM | d42:6 | d42:6 | 804.6145 | C47 H85 O6 N2 P1 | 10.573 | +H |
| X | SM(d42:6) | SM | d42:6 | d42:6 | 804.6145 | C47 H85 O6 N2 P1 | 10.945 | +H |
| * | SM(d42:6) | SM | d42:6 | d42:6 | 804.6145 | C47 H85 O6 N2 P1 | 12.263 | +H |
| X | SM(d42:7) | SM | d42:7 | d42:7 | 802.5989 | C47 H83 O6 N2 P1 | 9.296  | +H |
| X | SM(d42:7) | SM | d42:7 | d42:7 | 802.5989 | C47 H83 O6 N2 P1 | 9.652  | +H |
| X | SM(d42:7) | SM | d42:7 | d42:7 | 802.5989 | C47 H83 O6 N2 P1 | 9.938  | +H |

|   |           |    |       |       |          |                  |        |    |
|---|-----------|----|-------|-------|----------|------------------|--------|----|
| * | SM(d42:7) | SM | d42:7 | d42:7 | 802.5989 | C47 H83 O6 N2 P1 | 10.966 | +H |
| X | SM(d42:8) | SM | d42:8 | d42:8 | 800.5832 | C47 H81 O6 N2 P1 | 8.687  | +H |
| * | SM(d42:8) | SM | d42:8 | d42:8 | 800.5832 | C47 H81 O6 N2 P1 | 9.891  | +H |
| X | SM(d43:1) | SM | d43:1 | d43:1 | 828.7084 | C48 H97 O6 N2 P1 | 16.839 | +H |
| X | SM(d43:1) | SM | d43:1 | d43:1 | 828.7084 | C48 H97 O6 N2 P1 | 17.069 | +H |
| * | SM(d43:2) | SM | d43:2 | d43:2 | 826.6928 | C48 H95 O6 N2 P1 | 15.468 | +H |
| * | SM(d43:2) | SM | d43:2 | d43:2 | 826.6928 | C48 H95 O6 N2 P1 | 15.711 | +H |
| X | SM(d43:2) | SM | d43:2 | d43:2 | 826.6928 | C48 H95 O6 N2 P1 | 15.915 | +H |
| * | SM(d43:2) | SM | d43:2 | d43:2 | 826.6928 | C48 H95 O6 N2 P1 | 16.209 | +H |
| X | SM(d43:3) | SM | d43:3 | d43:3 | 824.6771 | C48 H93 O6 N2 P1 | 14.255 | +H |
| X | SM(d43:3) | SM | d43:3 | d43:3 | 824.6771 | C48 H93 O6 N2 P1 | 14.532 | +H |
| * | SM(d43:4) | SM | d43:4 | d43:4 | 822.6615 | C48 H91 O6 N2 P1 | 13.301 | +H |
| * | SM(d43:4) | SM | d43:4 | d43:4 | 822.6615 | C48 H91 O6 N2 P1 | 13.466 | +H |
| * | SM(d43:5) | SM | d43:5 | d43:5 | 820.6458 | C48 H89 O6 N2 P1 | 14.309 | +H |
| * | SM(d43:6) | SM | d43:6 | d43:6 | 818.6302 | C48 H87 O6 N2 P1 | 13.038 | +H |
| X | SM(d44:1) | SM | d44:1 | d44:1 | 842.7241 | C49 H99 O6 N2 P1 | 17.384 | +H |
| X | SM(d44:1) | SM | d44:1 | d44:1 | 842.7241 | C49 H99 O6 N2 P1 | 17.542 | +H |
| X | SM(d44:2) | SM | d44:2 | d44:2 | 840.7084 | C49 H97 O6 N2 P1 | 16.358 | +H |
| X | SM(d44:2) | SM | d44:2 | d44:2 | 840.7084 | C49 H97 O6 N2 P1 | 16.766 | +H |
| X | SM(d44:3) | SM | d44:3 | d44:3 | 838.6928 | C49 H95 O6 N2 P1 | 15.247 | +H |
| * | SM(d44:3) | SM | d44:3 | d44:3 | 838.6928 | C49 H95 O6 N2 P1 | 15.882 | +H |
| * | SM(d44:4) | SM | d44:4 | d44:4 | 836.6771 | C49 H93 O6 N2 P1 | 14.206 | +H |
| * | SM(d44:4) | SM | d44:4 | d44:4 | 836.6771 | C49 H93 O6 N2 P1 | 16.319 | +H |
| * | SM(d44:5) | SM | d44:5 | d44:5 | 834.6615 | C49 H91 O6 N2 P1 | 12.9   | +H |
| * | SM(d44:5) | SM | d44:5 | d44:5 | 834.6615 | C49 H91 O6 N2 P1 | 14.355 | +H |
| * | SM(d44:5) | SM | d44:5 | d44:5 | 834.6615 | C49 H91 O6 N2 P1 | 15.313 | +H |
| * | SM(d44:5) | SM | d44:5 | d44:5 | 834.6615 | C49 H91 O6 N2 P1 | 15.544 | +H |
| * | SM(d44:6) | SM | d44:6 | d44:6 | 832.6458 | C49 H89 O6 N2 P1 | 11.865 | +H |
| * | SM(d44:6) | SM | d44:6 | d44:6 | 832.6458 | C49 H89 O6 N2 P1 | 12.028 | +H |
| * | SM(d44:6) | SM | d44:6 | d44:6 | 832.6458 | C49 H89 O6 N2 P1 | 13.514 | +H |

|   |                    |    |                |       |          |                  |        |      |
|---|--------------------|----|----------------|-------|----------|------------------|--------|------|
| * | SM(d44:7)          | SM | d44:7          | d44:7 | 830.6302 | C49 H87 O6 N2 P1 | 10.733 | +H   |
| * | SM(d44:7)          | SM | d44:7          | d44:7 | 830.6302 | C49 H87 O6 N2 P1 | 11.003 | +H   |
| * | SM(d44:7)          | SM | d44:7          | d44:7 | 830.6302 | C49 H87 O6 N2 P1 | 12.527 | +H   |
| * | SM(d44:7)          | SM | d44:7          | d44:7 | 830.6302 | C49 H87 O6 N2 P1 | 12.712 | +H   |
| * | SM(d44:8)          | SM | d44:8          | d44:8 | 828.6145 | C49 H85 O6 N2 P1 | 11.58  | +H   |
| * | SM(d44:8)          | SM | d44:8          | d44:8 | 828.6145 | C49 H85 O6 N2 P1 | 12.107 | +H   |
| * | SM(d44:8)          | SM | d44:8          | d44:8 | 828.6145 | C49 H85 O6 N2 P1 | 12.519 | +H   |
| * | SM(d45:4)          | SM | d45:4          | d45:4 | 850.6928 | C50 H95 O6 N2 P1 | 16.835 | +H   |
| * | SM(d45:4)          | SM | d45:4          | d45:4 | 850.6928 | C50 H95 O6 N2 P1 | 17.071 | +H   |
| * | SM(d45:5)          | SM | d45:5          | d45:5 | 848.6771 | C50 H93 O6 N2 P1 | 15.719 | +H   |
| * | SM(d45:5)          | SM | d45:5          | d45:5 | 848.6771 | C50 H93 O6 N2 P1 | 16.217 | +H   |
| * | SM(d45:6)          | SM | d45:6          | d45:6 | 846.6615 | C50 H91 O6 N2 P1 | 14.517 | +H   |
| * | SM(d46:8)          | SM | d46:8          | d46:8 | 856.6458 | C51 H89 O6 N2 P1 | 12.895 | +H   |
| * | So(d18:0)          | So | d18:0          | d18:0 | 301.2981 | C18 H39 O2 N1    | 2.104  | +H   |
| * | So(d18:1)          | So | d18:1          | d18:1 | 299.2824 | C18 H37 O2 N1    | 1.887  | +H   |
| * | TG(10:0,12:0,14:0) | TG | 10:0/12:0/14:0 | 36:0  | 638.5485 | C39 H74 O6       | 16.294 | +NH4 |
| χ | TG(10:0,18:1,18:2) | TG | 10:0/18:1/18:2 | 46:3  | 772.6581 | C49 H88 O6       | 18.292 | +NH4 |
| * | TG(10:0,18:1,20:4) | TG | 10:0/18:1/20:4 | 48:5  | 796.6581 | C51 H88 O6       | 18.166 | +NH4 |
| χ | TG(10:0,18:2,18:2) | TG | 10:0/18:2/18:2 | 46:4  | 770.6424 | C49 H86 O6       | 17.664 | +NH4 |
| * | TG(10:0,18:2,18:2) | TG | 10:0/18:2/18:2 | 46:4  | 770.6424 | C49 H86 O6       | 17.889 | +NH4 |
| χ | TG(10:0,18:2,18:3) | TG | 10:0/18:2/18:3 | 46:5  | 768.6268 | C49 H84 O6       | 17.053 | +NH4 |
| * | TG(10:0,18:2,20:4) | TG | 10:0/18:2/20:4 | 48:6  | 794.6424 | C51 H86 O6       | 17.4   | +NH4 |
| * | TG(10:0,18:2,20:5) | TG | 10:0/18:2/20:5 | 48:7  | 792.6268 | C51 H84 O6       | 17.654 | +H   |
| * | TG(10:0,18:3,18:3) | TG | 10:0/18:3/18:3 | 46:6  | 766.6111 | C49 H82 O6       | 16.337 | +NH4 |
| * | TG(10:0,18:3,22:5) | TG | 10:0/18:3/22:5 | 50:8  | 818.6424 | C53 H86 O6       | 16.905 | +NH4 |
| * | TG(12:0,12:0,14:0) | TG | 12:0/12:0/14:0 | 38:0  | 666.5798 | C41 H78 O6       | 17.302 | +NH4 |
| * | TG(12:0,14:0,14:0) | TG | 12:0/14:0/14:0 | 40    | 694.6111 | C43 H82 O6       | 18.177 | +NH4 |
| χ | TG(12:0,18:2,18:2) | TG | 12:0/18:2/18:2 | 48:4  | 798.6737 | C51 H90 O6       | 18.381 | +NH4 |
| * | TG(12:0,18:2,18:2) | TG | 12:0/18:2/18:2 | 48:4  | 798.6737 | C51 H90 O6       | 18.618 | +NH4 |
| χ | TG(12:0,18:2,18:3) | TG | 12:0/18:2/18:3 | 48:5  | 796.6581 | C51 H88 O6       | 17.873 | +NH4 |

|   |                    |    |                |       |          |             |        |      |
|---|--------------------|----|----------------|-------|----------|-------------|--------|------|
| * | TG(12:0,18:2,22:6) | TG | 12:0/18:2/22:6 | 52:8  | 846.6737 | C55 H90 O6  | 18.036 | +NH4 |
| X | TG(12:0,18:3,18:3) | TG | 12:0/18:3/18:3 | 48:6  | 794.6424 | C51 H86 O6  | 17.242 | +NH4 |
| X | TG(14:0,18:2,18:3) | TG | 14:0/18:2/18:3 | 50:5  | 824.6894 | C53 H92 O6  | 18.569 | +NH4 |
| * | TG(14:0,18:2,18:3) | TG | 14:0/18:2/18:3 | 50:05 | 824.6894 | C53 H92 O6  | 18.846 | +NH4 |
| * | TG(14:0,18:2,20:5) | TG | 14:0/18:2/20:5 | 52:7  | 848.6894 | C55 H92 O6  | 19.007 | +H   |
| * | TG(14:0,18:2,22:6) | TG | 14:0/18:2/22:6 | 54:8  | 874.705  | C57 H94 O6  | 18.597 | +NH4 |
| * | TG(15:0,12:0,14:0) | TG | 15:0/12:0/14:0 | 41:0  | 708.6268 | C44 H84 O6  | 18.537 | +NH4 |
| * | TG(15:0,14:0,14:0) | TG | 15:0/14:0/14:0 | 43:0  | 736.6581 | C46 H88 O6  | 19.176 | +NH4 |
| * | TG(15:0,14:0,15:0) | TG | 15:0/14:0/15:0 | 44:0  | 750.6737 | C47 H90 O6  | 19.323 | +NH4 |
| X | TG(15:0,14:0,16:0) | TG | 15:0/14:0/16:0 | 45:0  | 764.6894 | C48 H92 O6  | 19.725 | +NH4 |
| * | TG(15:0,14:0,16:0) | TG | 15:0/14:0/16:0 | 45:0  | 764.6894 | C48 H92 O6  | 19.903 | +NH4 |
| * | TG(15:0,14:0,16:1) | TG | 15:0/14:0/16:1 | 45:1  | 762.6737 | C48 H90 O6  | 19.76  | +NH4 |
| X | TG(15:0,14:0,18:2) | TG | 15:0/14:0/18:2 | 47:2  | 788.6894 | C50 H92 O6  | 19.207 | +NH4 |
| * | TG(15:0,15:0,16:0) | TG | 15:0/15:0/16:0 | 46:0  | 778.705  | C49 H94 O6  | 19.826 | +NH4 |
| * | TG(15:0,16:0,16:0) | TG | 15:0/16:0/16:0 | 47:0  | 792.7207 | C50 H96 O6  | 20.105 | +NH4 |
| * | TG(15:0,16:0,16:0) | TG | 15:0/16:0/16:0 | 47:0  | 792.7207 | C50 H96 O6  | 20.222 | +NH4 |
| * | TG(15:0,16:0,16:1) | TG | 15:0/16:0/16:1 | 47:01 | 790.705  | C50 H94 O6  | 19.738 | +NH4 |
| X | TG(15:0,16:0,18:1) | TG | 15:0/16:0/18:1 | 49:1  | 818.7363 | C52 H98 O6  | 20.221 | +NH4 |
| X | TG(15:0,16:0,18:2) | TG | 15:0/16:0/18:2 | 49:2  | 816.7207 | C52 H96 O6  | 19.667 | +NH4 |
| * | TG(15:0,16:0,24:0) | TG | 15:0/16:0/24:0 | 55:0  | 904.8459 | C58 H112 O6 | 21.747 | +NH4 |
| * | TG(15:0,16:1,16:1) | TG | 15:0/16:1/16:1 | 47:2  | 788.6894 | C50 H92 O6  | 19.313 | +NH4 |
| * | TG(15:0,16:1,18:1) | TG | 15:0/16:1/18:1 | 49:2  | 816.7207 | C52 H96 O6  | 19.788 | +NH4 |
| X | TG(15:0,16:1,18:2) | TG | 15:0/16:1/18:2 | 49:3  | 814.705  | C52 H94 O6  | 19.255 | +NH4 |
| * | TG(15:0,16:1,22:6) | TG | 15:0/16:1/22:6 | 53:07 | 862.705  | C56 H94 O6  | 18.699 | +NH4 |
| * | TG(15:0,18:1,18:1) | TG | 15:0/18:1/18:1 | 51:2  | 844.752  | C54 H100 O6 | 20.246 | +NH4 |
| X | TG(15:0,18:1,18:2) | TG | 15:0/18:1/18:2 | 51:3  | 842.7363 | C54 H98 O6  | 19.73  | +NH4 |
| * | TG(15:0,18:1,18:3) | TG | 15:0/18:1/18:3 | 51:4  | 840.7207 | C54 H96 O6  | 19.3   | +NH4 |
| * | TG(15:0,18:1,20:4) | TG | 15:0/18:1/20:4 | 53:5  | 866.7363 | C56 H98 O6  | 20.144 | +H   |
| * | TG(15:0,18:1,22:5) | TG | 15:0/18:1/22:5 | 55:6  | 892.752  | C58 H100 O6 | 19.662 | +NH4 |
| * | TG(15:0,18:2,18:3) | TG | 15:0/18:2/18:3 | 51:05 | 838.705  | C54 H94 O6  | 18.881 | +NH4 |

|   |                    |    |                |       |          |             |        |      |
|---|--------------------|----|----------------|-------|----------|-------------|--------|------|
| * | TG(15:0,18:2,20:3) | TG | 15:0/18:2/20:3 | 53:5  | 866.7363 | C56 H98 O6  | 19.472 | +NH4 |
| * | TG(15:0,18:2,20:4) | TG | 15:0/18:2/20:4 | 53:6  | 864.7207 | C56 H96 O6  | 19.117 | +NH4 |
| * | TG(15:0,18:2,20:5) | TG | 15:0/18:2/20:5 | 53:7  | 862.705  | C56 H94 O6  | 19.447 | +NH4 |
| * | TG(15:0,18:2,22:5) | TG | 15:0/18:2/22:5 | 55:7  | 890.7363 | C58 H98 O6  | 19.315 | +NH4 |
| * | TG(15:0,18:2,22:6) | TG | 15:0/18:2/22:6 | 55:8  | 888.7207 | C58 H96 O6  | 18.898 | +NH4 |
| * | TG(15:0,18:3,20:5) | TG | 15:0/18:3/20:5 | 53:08 | 860.6894 | C56 H92 O6  | 18.889 | +H   |
| * | TG(15:0,22:5,22:5) | TG | 15:0/22:5/22:5 | 59:0  | 940.752  | C62 H100 O6 | 18.992 | +NH4 |
| * | TG(16:0,10:0,16:0) | TG | 16:0/10:0/16:0 | 42:0  | 722.6424 | C45 H86 O6  | 18.861 | +NH4 |
| * | TG(16:0,12:0,14:0) | TG | 16:0/12:0/14:0 | 42:0  | 722.6424 | C45 H86 O6  | 18.579 | +NH4 |
| X | TG(16:0,12:0,16:0) | TG | 16:0/12:0/16:0 | 44:0  | 750.6737 | C47 H90 O6  | 19.431 | +NH4 |
| X | TG(16:0,14:0,16:0) | TG | 16:0/14:0/16:0 | 46:0  | 778.705  | C49 H94 O6  | 19.977 | +NH4 |
| * | TG(16:0,14:0,16:1) | TG | 16:0/14:0/16:1 | 46:1  | 776.6894 | C49 H92 O6  | 19.411 | +NH4 |
| X | TG(16:0,14:0,18:1) | TG | 16:0/14:0/18:1 | 48:1  | 804.7207 | C51 H96 O6  | 19.804 | +NH4 |
| * | TG(16:0,14:0,24:0) | TG | 16:0/14:0/24:0 | 54:0  | 890.8302 | C57 H110 O6 | 21.599 | +NH4 |
| * | TG(16:0,16:0,16:0) | TG | 16:0/16:0/16:0 | 48:0  | 806.7363 | C51 H98 O6  | 20.282 | +NH4 |
| * | TG(16:0,16:0,16:0) | TG | 16:0/16:0/16:0 | 48:0  | 806.7363 | C51 H98 O6  | 20.403 | +NH4 |
| * | TG(16:0,16:0,16:1) | TG | 16:0/16:0/16:1 | 48:1  | 804.7207 | C51 H96 O6  | 20.072 | +NH4 |
| * | TG(16:0,16:0,17:0) | TG | 16:0/16:0/17:0 | 49:0  | 820.752  | C52 H100 O6 | 20.673 | +NH4 |
| X | TG(16:0,16:0,18:1) | TG | 16:0/16:0/18:1 | 50:1  | 832.752  | C53 H100 O6 | 20.254 | +NH4 |
| X | TG(16:0,16:0,18:1) | TG | 16:0/16:0/18:1 | 50:1  | 832.752  | C53 H100 O6 | 20.399 | +NH4 |
| X | TG(16:0,16:0,18:2) | TG | 16:0/16:0/18:2 | 50:2  | 830.7363 | C53 H98 O6  | 19.2   | +NH4 |
| * | TG(16:0,16:0,19:0) | TG | 16:0/16:0/19:0 | 51:0  | 848.7833 | C54 H104 O6 | 20.928 | +NH4 |
| * | TG(16:0,16:0,20:3) | TG | 16:0/16:0/20:3 | 52:3  | 856.752  | C55 H100 O6 | 18.244 | +H   |
| * | TG(16:0,16:0,20:4) | TG | 16:0/16:0/20:4 | 52:4  | 854.7363 | C55 H98 O6  | 19.86  | +NH4 |
| X | TG(16:0,16:0,21:0) | TG | 16:0/16:0/21:0 | 53:0  | 876.8146 | C56 H108 O6 | 21.382 | +NH4 |
| * | TG(16:0,16:0,22:6) | TG | 16:0/16:0/22:6 | 54:6  | 878.7363 | C57 H98 O6  | 19.404 | +NH4 |
| * | TG(16:0,16:0,24:0) | TG | 16:0/16:0/24:0 | 56:0  | 918.8615 | C59 H114 O6 | 21.896 | +NH4 |
| X | TG(16:0,16:1,18:1) | TG | 16:0/16:1/18:1 | 50:2  | 830.7363 | C53 H98 O6  | 19.915 | +NH4 |
| X | TG(16:0,16:1,18:2) | TG | 16:0/16:1/18:2 | 50:3  | 828.7207 | C53 H96 O6  | 19.673 | +NH4 |
| X | TG(16:0,17:0,18:1) | TG | 16:0/17:0/18:1 | 51:1  | 846.7676 | C54 H102 O6 | 20.576 | +NH4 |

|   |                     |    |                 |       |          |             |        |      |
|---|---------------------|----|-----------------|-------|----------|-------------|--------|------|
| X | TG(16:0,18:1,18:1)  | TG | 16:0/18:1/18:1  | 52:2  | 858.7676 | C55 H102 O6 | 20.358 | +NH4 |
| X | TG(16:0,18:1,18:1)  | TG | 16:0/18:1/18:1  | 52:2  | 858.7676 | C55 H102 O6 | 20.507 | +NH4 |
| X | TG(16:0,18:1,18:2)  | TG | 16:0/18:1/18:2  | 52:3  | 856.752  | C55 H100 O6 | 20     | +NH4 |
| X | TG(16:0,18:1,18:2)  | TG | 16:0/18:1/18:2  | 52:3  | 856.752  | C55 H100 O6 | 21.102 | +NH4 |
| X | TG(16:0,18:1,18:3)  | TG | 16:0/18:1/18:3  | 52:4  | 854.7363 | C55 H98 O6  | 17.672 | +H   |
| * | TG(16:0,18:1,18:3)  | TG | 16:0/18:1/18:3  | 52:4  | 854.7363 | C55 H98 O6  | 17.944 | +H   |
| * | TG(16:0,18:1,21:0)  | TG | 16:0/18:1/21:0  | 55:1  | 902.8302 | C58 H110 O6 | 21.307 | +NH4 |
| X | TG(16:0,18:1,22:0)  | TG | 16:0/18:1/22:0  | 56:1  | 916.8459 | C59 H112 O6 | 21.554 | +NH4 |
| * | TG(16:0,18:1,22:4)  | TG | 16:0/18:1/22:4  | 56:5  | 908.7833 | C59 H104 O6 | 20.162 | +NH4 |
| * | TG(16:0,18:1,22:4)  | TG | 16:0/18:1/22:4  | 56:5  | 908.7833 | C59 H104 O6 | 20.765 | +H   |
| * | TG(16:0,18:1,22:6)  | TG | 16:0/18:1/22:6  | 56:7  | 904.752  | C59 H100 O6 | 19.651 | +NH4 |
| * | TG(16:0,18:1,23:0)  | TG | 16:0/18:1/23:0  | 57:1  | 930.8615 | C60 H114 O6 | 21.705 | +NH4 |
| * | TG(16:0,18:1,24:1)  | TG | 16:0/18:1/24:1  | 58:2  | 942.8615 | C61 H114 O6 | 21.49  | +NH4 |
| * | TG(16:0,18:2,18:2)  | TG | 16:0/18:2/18:2  | 52:4  | 854.7363 | C55 H98 O6  | 19.579 | +NH4 |
| X | TG(16:0,18:2,18:2)  | TG | 16:0/18:2/18:2  | 52:4  | 854.7363 | C55 H98 O6  | 24.399 | +NH4 |
| X | TG(16:0,18:2,18:3)  | TG | 16:0/18:2/18:3  | 52:5  | 852.7207 | C55 H96 O6  | 17.376 | +H   |
| X | TG(16:0,18:2,18:3)  | TG | 16:0/18:2/18:3  | 52:5  | 852.7207 | C55 H96 O6  | 19.191 | +NH4 |
| * | TG(16:0,18:2,20:3)  | TG | 16:0/18:2/20:3  | 54:5  | 880.752  | C57 H100 O6 | 19.827 | +NH4 |
| * | TG(16:0,18:2,20:5)  | TG | 16:0/18:2/20:5  | 54:7  | 876.7207 | C57 H96 O6  | 19.012 | +NH4 |
| * | TG(16:0,18:2,22:6)  | TG | 16:0/18:2/22:6  | 56:8  | 902.7363 | C59 H98 O6  | 19.214 | +NH4 |
| * | TG(16:0,18:2,23:0)  | TG | 16:0/18:2/23:0  | 57:2  | 928.8459 | C60 H112 O6 | 21.396 | +NH4 |
| * | TG(16:0,18:3,20:4)  | TG | 16:0/18:3/20:4  | 54:7  | 876.7207 | C57 H96 O6  | 19.85  | +H   |
| * | TG(16:0,18:3,22:0)  | TG | 16:0/18:3/22:0  | 56:3  | 912.8146 | C59 H108 O6 | 20.997 | +NH4 |
| * | TG(16:0,18:3,22:6)  | TG | 16:0/18:3/22:6  | 56:9  | 900.7207 | C59 H96 O6  | 18.812 | +NH4 |
| * | TG(16:0,18:3,24:0)  | TG | 16:0/18:3/24:0  | 58:3  | 940.8459 | C61 H112 O6 | 21.381 | +NH4 |
| * | TG(16:0,20:4,22:0)  | TG | 16:0/20:4/22:0  | 58:04 | 938.8302 | C61 H110 O6 | 21.153 | +NH4 |
| * | TG(16:0,20:5,22:6)  | TG | 16:0/20:5/22:6  | 58:1  | 924.7207 | C61 H96 O6  | 18.606 | +NH4 |
| * | TG(16:0,22:6,22:6)  | TG | 16:0/22:6/22:6  | 60:2  | 950.7363 | C63 H98 O6  | 18.835 | +NH4 |
| X | TG(16:0,8:0,18:2)   | TG | 16:0/8:0/18:2   | 42:2  | 718.6111 | C45 H82 O6  | 17.597 | +NH4 |
| X | TG(16:0e,16:0,18:2) | TG | 16:0e/16:0/18:2 | 50:2e | 816.7571 | C53 H100 O5 | 20.722 | +NH4 |

|   |                    |    |                |       |          |             |        |      |
|---|--------------------|----|----------------|-------|----------|-------------|--------|------|
| * | TG(16:1,10:0,18:2) | TG | 16:1/10:0/18:2 | 44:3  | 744.6268 | C47 H84 O6  | 17.886 | +NH4 |
| * | TG(16:1,12:0,14:0) | TG | 16:1/12:0/14:0 | 42:1  | 720.6268 | C45 H84 O6  | 18.276 | +NH4 |
| * | TG(16:1,12:0,18:1) | TG | 16:1/12:0/18:1 | 46:2  | 774.6737 | C49 H90 O6  | 18.974 | +NH4 |
| * | TG(16:1,13:0,14:0) | TG | 16:1/13:0/14:0 | 43:01 | 734.6424 | C46 H86 O6  | 18.493 | +NH4 |
| * | TG(16:1,14:0,14:0) | TG | 16:1/14:0/14:0 | 44:1  | 748.6581 | C47 H88 O6  | 19.332 | +NH4 |
| X | TG(16:1,14:0,18:1) | TG | 16:1/14:0/18:1 | 48:2  | 802.705  | C51 H94 O6  | 19.387 | +NH4 |
| * | TG(16:1,14:0,18:2) | TG | 16:1/14:0/18:2 | 48:3  | 800.6894 | C51 H92 O6  | 19.316 | +NH4 |
| * | TG(16:1,16:1,16:1) | TG | 16:1/16:1/16:1 | 48:3  | 800.6894 | C51 H92 O6  | 19.736 | +NH4 |
| * | TG(16:1,16:1,18:1) | TG | 16:1/16:1/18:1 | 50:3  | 828.7207 | C53 H96 O6  | 19.531 | +NH4 |
| * | TG(16:1,16:1,24:0) | TG | 16:1/16:1/24:0 | 56:2  | 914.8302 | C59 H110 O6 | 21.298 | +NH4 |
| * | TG(16:1,18:1,18:2) | TG | 16:1/18:1/18:2 | 52:4  | 854.7363 | C55 H98 O6  | 19.473 | +NH4 |
| * | TG(16:1,18:1,18:2) | TG | 16:1/18:1/18:2 | 52:4  | 854.7363 | C55 H98 O6  | 21.231 | +NH4 |
| X | TG(16:1,18:2,18:3) | TG | 16:1/18:2/18:3 | 52:6  | 850.705  | C55 H94 O6  | 16.547 | +H   |
| X | TG(16:1,18:2,18:3) | TG | 16:1/18:2/18:3 | 52:6  | 850.705  | C55 H94 O6  | 18.584 | +NH4 |
| * | TG(16:1,18:2,20:5) | TG | 16:1/18:2/20:5 | 54:8  | 874.705  | C57 H94 O6  | 18.392 | +NH4 |
| * | TG(16:1,18:3,18:3) | TG | 16:1/18:3/18:3 | 52:7  | 848.6894 | C55 H92 O6  | 18.364 | +NH4 |
| * | TG(16:1,18:3,22:6) | TG | 16:1/18:3/22:6 | 56:10 | 898.705  | C59 H94 O6  | 18.025 | +NH4 |
| * | TG(16:1,22:6,22:6) | TG | 16:1/22:6/22:6 | 60:13 | 948.7207 | C63 H96 O6  | 18.045 | +NH4 |
| * | TG(16:2,18:2,18:3) | TG | 16:2/18:2/18:3 | 52:7  | 848.6894 | C55 H92 O6  | 18.105 | +NH4 |
| * | TG(16:2,18:3,18:3) | TG | 16:2/18:3/18:3 | 52:8  | 846.6737 | C55 H90 O6  | 17.567 | +NH4 |
| X | TG(17:0,18:1,18:2) | TG | 17:0/18:1/18:2 | 53:3  | 870.7676 | C56 H102 O6 | 20.221 | +H   |
| * | TG(17:0,18:1,18:3) | TG | 17:0/18:1/18:3 | 53:4  | 868.752  | C56 H100 O6 | 19.839 | +H   |
| * | TG(17:0,18:1,20:4) | TG | 17:0/18:1/20:4 | 55:5  | 894.7676 | C58 H102 O6 | 20.073 | +NH4 |
| X | TG(17:0,18:2,18:2) | TG | 17:0/18:2/18:2 | 53:4  | 868.752  | C56 H100 O6 | 19.734 | +NH4 |
| * | TG(17:0,18:2,22:4) | TG | 17:0/18:2/22:4 | 57:6  | 920.7833 | C60 H104 O6 | 20.037 | +NH4 |
| * | TG(17:0,18:2,22:5) | TG | 17:0/18:2/22:5 | 57:7  | 918.7676 | C60 H102 O6 | 19.698 | +NH4 |
| X | TG(18:0,16:0,16:0) | TG | 18:0/16:0/16:0 | 50:0  | 834.7676 | C53 H102 O6 | 20.834 | +NH4 |
| X | TG(18:0,16:0,18:0) | TG | 18:0/16:0/18:0 | 52:0  | 862.7989 | C55 H106 O6 | 21.229 | +NH4 |
| X | TG(18:0,16:0,18:1) | TG | 18:0/16:0/18:1 | 52:1  | 860.7833 | C55 H104 O6 | 20.798 | +NH4 |
| * | TG(18:0,16:0,18:3) | TG | 18:0/16:0/18:3 | 52:3  | 856.752  | C55 H100 O6 | 20.831 | +H   |



|   |                     |    |                 |       |           |             |        |      |
|---|---------------------|----|-----------------|-------|-----------|-------------|--------|------|
| * | TG(18:0,16:0,22:6)  | TG | 18:0/16:0/22:6  | 56:6  | 906.7676  | C59 H102 O6 | 20.183 | +NH4 |
| * | TG(18:0,16:0,24:1)  | TG | 18:0/16:0/24:1  | 58:1  | 944.8772  | C61 H116 O6 | 21.908 | +NH4 |
| * | TG(18:0,17:0,18:1)  | TG | 18:0/17:0/18:1  | 53:1  | 874.7989  | C56 H106 O6 | 21.027 | +NH4 |
| X | TG(18:0,17:0,18:2)  | TG | 18:0/17:0/18:2  | 53:2  | 872.7833  | C56 H104 O6 | 20.581 | +NH4 |
| * | TG(18:0,17:0,20:4)  | TG | 18:0/17:0/20:4  | 55:4  | 896.7833  | C58 H104 O6 | 20.568 | +NH4 |
| * | TG(18:0,18:0,20:4)  | TG | 18:0/18:0/20:4  | 56:4  | 910.7989  | C59 H106 O6 | 20.752 | +NH4 |
| * | TG(18:0,18:0,22:0)  | TG | 18:0/18:0/22:0  | 58:0  | 946.8928  | C61 H118 O6 | 22.197 | +NH4 |
| * | TG(18:0,18:0,22:6)  | TG | 18:0/18:0/22:6  | 58:6  | 934.7989  | C61 H106 O6 | 20.607 | +NH4 |
| * | TG(18:0,18:1,18:1)  | TG | 18:0/18:1/18:1  | 54:2  | 886.7989  | C57 H106 O6 | 20.775 | +NH4 |
| * | TG(18:0,18:1,18:3)  | TG | 18:0/18:1/18:3  | 54:4  | 882.7676  | C57 H102 O6 | 20.077 | +NH4 |
| * | TG(18:0,18:1,20:4)  | TG | 18:0/18:1/20:4  | 56:5  | 908.7833  | C59 H104 O6 | 20.342 | +NH4 |
| * | TG(18:0,18:1,22:4)  | TG | 18:0/18:1/22:4  | 58:5  | 936.8146  | C61 H108 O6 | 20.598 | +NH4 |
| * | TG(18:0,18:1,22:5)  | TG | 18:0/18:1/22:5  | 58:6  | 934.7989  | C61 H106 O6 | 20.464 | +NH4 |
| * | TG(18:0,18:1,22:6)  | TG | 18:0/18:1/22:6  | 58:7  | 932.7833  | C61 H104 O6 | 20.158 | +NH4 |
| * | TG(18:0,18:2,20:4)  | TG | 18:0/18:2/20:4  | 56:6  | 906.7676  | C59 H102 O6 | 19.929 | +NH4 |
| * | TG(18:0,18:2,22:4)  | TG | 18:0/18:2/22:4  | 58:6  | 934.7989  | C61 H106 O6 | 20.261 | +NH4 |
| * | TG(18:0,18:2,22:4)  | TG | 18:0/18:2/22:4  | 58:6  | 934.7989  | C61 H106 O6 | 20.837 | +H   |
| * | TG(18:0,20:0,22:0)  | TG | 18:0/20:0/22:0  | 60:0  | 974.9241  | C63 H122 O6 | 22.466 | +NH4 |
| * | TG(18:0,20:4,22:4)  | TG | 18:0/20:4/22:4  | 60:8  | 958.7989  | C63 H106 O6 | 20.133 | +NH4 |
| * | TG(18:0,20:4,22:6)  | TG | 18:0/20:4/22:6  | 60:10 | 954.7676  | C63 H102 O6 | 19.418 | +NH4 |
| X | TG(18:0,20:4,22:6)  | TG | 18:0/20:4/22:6  | 60:10 | 954.7676  | C63 H102 O6 | 19.614 | +NH4 |
| * | TG(18:0,20:4,24:1)  | TG | 18:0/20:4/24:1  | 62:5  | 992.8772  | C65 H116 O6 | 21.484 | +NH4 |
| X | TG(18:0,22:0,22:0)  | TG | 18:0/22:0/22:0  | 62:0  | 1002.9554 | C65 H126 O6 | 22.769 | +NH4 |
| * | TG(18:0e,18:1,18:2) | TG | 18:0e/18:1/18:2 | 54:3e | 870.804   | C57 H106 O5 | 21.09  | +NH4 |
| X | TG(18:1,12:0,18:2)  | TG | 18:1/12:0/18:2  | 48:3  | 800.6894  | C51 H92 O6  | 18.91  | +NH4 |
| * | TG(18:1,12:0,20:5)  | TG | 18:1/12:0/20:5  | 50:6  | 822.6737  | C53 H90 O6  | 18.411 | +NH4 |
| X | TG(18:1,14:0,18:2)  | TG | 18:1/14:0/18:2  | 50:3  | 828.7207  | C53 H96 O6  | 19.385 | +NH4 |
| * | TG(18:1,14:0,18:3)  | TG | 18:1/14:0/18:3  | 50:04 | 826.705   | C53 H94 O6  | 19.006 | +NH4 |
| X | TG(18:1,18:1,18:1)  | TG | 18:1/18:1/18:1  | 54:3  | 884.7833  | C57 H104 O6 | 20.433 | +NH4 |
| * | TG(18:1,18:1,18:2)  | TG | 18:1/18:1/18:2  | 54:4  | 882.7676  | C57 H102 O6 | 18.148 | +H   |

|   |                    |    |                |       |          |             |        |      |
|---|--------------------|----|----------------|-------|----------|-------------|--------|------|
| * | TG(18:1,18:1,18:2) | TG | 18:1/18:1/18:2 | 54:4  | 882.7676 | C57 H102 O6 | 19.958 | +NH4 |
| * | TG(18:1,18:1,18:3) | TG | 18:1/18:1/18:3 | 54:5  | 880.752  | C57 H100 O6 | 17.649 | +H   |
| * | TG(18:1,18:1,20:2) | TG | 18:1/18:1/20:2 | 56:04 | 910.7989 | C59 H106 O6 | 20.387 | +NH4 |
| * | TG(18:1,18:1,20:4) | TG | 18:1/18:1/20:4 | 56:6  | 906.7676 | C59 H102 O6 | 19.792 | +NH4 |
| * | TG(18:1,18:1,22:5) | TG | 18:1/18:1/22:5 | 58:7  | 932.7833 | C61 H104 O6 | 19.881 | +NH4 |
| * | TG(18:1,18:1,22:6) | TG | 18:1/18:1/22:6 | 58:8  | 930.7676 | C61 H102 O6 | 19.752 | +NH4 |
| * | TG(18:1,18:1,23:0) | TG | 18:1/18:1/23:0 | 59:2  | 956.8772 | C62 H116 O6 | 21.696 | +NH4 |
| * | TG(18:1,18:1,24:1) | TG | 18:1/18:1/24:1 | 60:3  | 968.8772 | C63 H116 O6 | 21.473 | +NH4 |
| * | TG(18:1,18:2,18:2) | TG | 18:1/18:2/18:2 | 54:05 | 880.752  | C57 H100 O6 | 19.548 | +NH4 |
| * | TG(18:1,18:2,18:2) | TG | 18:1/18:2/18:2 | 54:5  | 880.752  | C57 H100 O6 | 19.676 | +NH4 |
| X | TG(18:1,18:2,18:3) | TG | 18:1/18:2/18:3 | 54:6  | 878.7363 | C57 H98 O6  | 17.215 | +H   |
| X | TG(18:1,18:2,18:3) | TG | 18:1/18:2/18:3 | 54:6  | 878.7363 | C57 H98 O6  | 17.398 | +H   |
| X | TG(18:1,18:2,20:4) | TG | 18:1/18:2/20:4 | 56:7  | 904.752  | C59 H100 O6 | 19.408 | +NH4 |
| * | TG(18:1,18:2,20:5) | TG | 18:1/18:2/20:5 | 56:8  | 902.7363 | C59 H98 O6  | 18.267 | +NH4 |
| * | TG(18:1,18:2,21:0) | TG | 18:1/18:2/21:0 | 57:3  | 926.8302 | C60 H110 O6 | 20.989 | +NH4 |
| * | TG(18:1,18:2,22:0) | TG | 18:1/18:2/22:0 | 58:3  | 940.8459 | C61 H112 O6 | 21.231 | +NH4 |
| * | TG(18:1,18:2,22:5) | TG | 18:1/18:2/22:5 | 58:8  | 930.7676 | C61 H102 O6 | 19.345 | +NH4 |
| X | TG(18:1,18:2,23:0) | TG | 18:1/18:2/23:0 | 59:3  | 954.8615 | C62 H114 O6 | 21.377 | +NH4 |
| * | TG(18:1,18:3,18:3) | TG | 18:1/18:3/18:3 | 54:7  | 876.7207 | C57 H96 O6  | 17.102 | +H   |
| * | TG(18:1,18:3,22:5) | TG | 18:1/18:3/22:5 | 58:9  | 928.752  | C61 H100 O6 | 19.786 | +H   |
| * | TG(18:1,20:3,22:6) | TG | 18:1/20:3/22:6 | 60:10 | 954.7676 | C63 H102 O6 | 19.297 | +NH4 |
| * | TG(18:1,20:4,20:4) | TG | 18:1/20:4/20:4 | 58:9  | 928.752  | C61 H100 O6 | 19.428 | +NH4 |
| * | TG(18:1,20:4,22:0) | TG | 18:1/20:4/22:0 | 60:5  | 964.8459 | C63 H112 O6 | 21.102 | +NH4 |
| * | TG(18:1,20:4,22:4) | TG | 18:1/20:4/22:4 | 60:9  | 956.7833 | C63 H104 O6 | 19.645 | +NH4 |
| * | TG(18:1,20:4,22:6) | TG | 18:1/20:4/22:6 | 60:11 | 952.752  | C63 H100 O6 | 19     | +NH4 |
| * | TG(18:1,20:4,24:1) | TG | 18:1/20:4/24:1 | 62:6  | 990.8615 | C65 H114 O6 | 21.054 | +NH4 |
| * | TG(18:2,13:0,18:2) | TG | 18:2/13:0/18:2 | 49:4  | 812.6894 | C52 H92 O6  | 18.783 | +NH4 |
| * | TG(18:2,18:2,18:2) | TG | 18:2/18:2/18:2 | 54:6  | 878.7363 | C57 H98 O6  | 19.108 | +NH4 |
| X | TG(18:2,18:2,18:2) | TG | 18:2/18:2/18:2 | 54:6  | 878.7363 | C57 H98 O6  | 22.188 | +NH4 |
| X | TG(18:2,18:2,18:2) | TG | 18:2/18:2/18:2 | 54:6  | 878.7363 | C57 H98 O6  | 23.119 | +NH4 |

|   |                    |    |                |       |          |             |        |      |
|---|--------------------|----|----------------|-------|----------|-------------|--------|------|
| * | TG(18:2,18:2,20:4) | TG | 18:2/18:2/20:4 | 56:8  | 902.7363 | C59 H98 O6  | 18.917 | +NH4 |
| * | TG(18:2,18:2,21:0) | TG | 18:2/18:2/21:0 | 57:4  | 924.8146 | C60 H108 O6 | 20.657 | +NH4 |
| * | TG(18:2,18:2,22:6) | TG | 18:2/18:2/22:6 | 58:10 | 926.7363 | C61 H98 O6  | 18.718 | +H   |
| * | TG(18:2,18:2,22:6) | TG | 18:2/18:2/22:6 | 58:10 | 926.7363 | C61 H98 O6  | 19.037 | +NH4 |
| X | TG(18:2,20:4,22:6) | TG | 18:2/20:4/22:6 | 60:12 | 950.7363 | C63 H98 O6  | 18.51  | +NH4 |
| * | TG(18:2,22:6,22:6) | TG | 18:2/22:6/22:6 | 62:14 | 974.7363 | C65 H98 O6  | 18.421 | +NH4 |
| * | TG(18:2,22:6,22:6) | TG | 18:2/22:6/22:6 | 62:14 | 974.7363 | C65 H98 O6  | 19.013 | +H   |
| X | TG(18:3,18:2,18:2) | TG | 18:3/18:2/18:2 | 54:7  | 876.7207 | C57 H96 O6  | 16.43  | +H   |
| * | TG(18:3,18:2,18:2) | TG | 18:3/18:2/18:2 | 54:7  | 876.7207 | C57 H96 O6  | 16.591 | +H   |
| X | TG(18:3,18:2,18:2) | TG | 18:3/18:2/18:2 | 54:7  | 876.7207 | C57 H96 O6  | 16.967 | +H   |
| X | TG(18:3,18:2,18:2) | TG | 18:3/18:2/18:2 | 54:7  | 876.7207 | C57 H96 O6  | 17.53  | +H   |
| X | TG(18:3,18:2,18:2) | TG | 18:3/18:2/18:2 | 54:7  | 876.7207 | C57 H96 O6  | 18.681 | +NH4 |
| X | TG(18:3,18:2,18:3) | TG | 18:3/18:2/18:3 | 54:8  | 874.705  | C57 H94 O6  | 16.026 | +H   |
| X | TG(18:3,18:2,18:3) | TG | 18:3/18:2/18:3 | 54:8  | 874.705  | C57 H94 O6  | 18.215 | +NH4 |
| X | TG(18:3,18:2,20:4) | TG | 18:3/18:2/20:4 | 56:9  | 900.7207 | C59 H96 O6  | 18.374 | +NH4 |
| X | TG(18:3,18:2,20:4) | TG | 18:3/18:2/20:4 | 56:9  | 900.7207 | C59 H96 O6  | 18.493 | +NH4 |
| X | TG(18:3,18:2,20:5) | TG | 18:3/18:2/20:5 | 56:10 | 898.705  | C59 H94 O6  | 18.687 | +H   |
| * | TG(18:3,18:2,20:5) | TG | 18:3/18:2/20:5 | 56:10 | 898.705  | C59 H94 O6  | 19.015 | +H   |
| * | TG(18:3,18:2,22:5) | TG | 18:3/18:2/22:5 | 58:10 | 926.7363 | C61 H98 O6  | 18.519 | +NH4 |
| X | TG(18:3,18:3,18:3) | TG | 18:3/18:3/18:3 | 54:9  | 872.6894 | C57 H92 O6  | 17.7   | +NH4 |
| * | TG(18:3,18:3,20:5) | TG | 18:3/18:3/20:5 | 56:11 | 896.6894 | C59 H92 O6  | 18.589 | +H   |
| X | TG(18:3,18:3,22:6) | TG | 18:3/18:3/22:6 | 58:12 | 922.705  | C61 H94 O6  | 17.797 | +NH4 |
| * | TG(18:3,20:4,20:4) | TG | 18:3/20:4/20:4 | 58:11 | 924.7207 | C61 H96 O6  | 18.273 | +NH4 |
| * | TG(18:3,20:5,22:5) | TG | 18:3/20:5/22:5 | 60:13 | 948.7207 | C63 H96 O6  | 17.801 | +NH4 |
| * | TG(18:3,20:5,22:6) | TG | 18:3/20:5/22:6 | 60:14 | 946.705  | C63 H94 O6  | 17.533 | +NH4 |
| * | TG(18:3,22:5,22:6) | TG | 18:3/22:5/22:6 | 62:14 | 974.7363 | C65 H98 O6  | 18.096 | +NH4 |
| * | TG(18:3,22:6,22:6) | TG | 18:3/22:6/22:6 | 62:15 | 972.7207 | C65 H96 O6  | 17.812 | +NH4 |
| * | TG(18:4,16:0,18:2) | TG | 18:4/16:0/18:2 | 52:6  | 850.705  | C55 H94 O6  | 18.808 | +NH4 |
| X | TG(18:4,18:1,18:2) | TG | 18:4/18:1/18:2 | 54:7  | 876.7207 | C57 H96 O6  | 17.21  | +H   |
| * | TG(18:4,18:2,18:2) | TG | 18:4/18:2/18:2 | 54:8  | 874.705  | C57 H94 O6  | 16.262 | +H   |

|   |                     |    |                 |       |          |             |        |      |
|---|---------------------|----|-----------------|-------|----------|-------------|--------|------|
| X | TG(18:4,18:2,18:2)  | TG | 18:4/18:2/18:2  | 54:8  | 874.705  | C57 H94 O6  | 17.054 | +H   |
| X | TG(18:4,18:2,18:2)  | TG | 18:4/18:2/18:2  | 54:8  | 874.705  | C57 H94 O6  | 18.779 | +NH4 |
| * | TG(18:4,18:3,18:3)  | TG | 18:4/18:3/18:3  | 54:10 | 870.6737 | C57 H90 O6  | 18.104 | +H   |
| * | TG(18:4,18:3,18:3)  | TG | 18:4/18:3/18:3  | 54:10 | 870.6737 | C57 H90 O6  | 18.369 | +H   |
| * | TG(18:4,18:3,20:5)  | TG | 18:4/18:3/20:5  | 56:12 | 894.6737 | C59 H90 O6  | 17.691 | +H   |
| * | TG(19:0,18:1,18:1)  | TG | 19:0/18:1/18:1  | 55:2  | 900.8146 | C58 H108 O6 | 21.003 | +NH4 |
| * | TG(19:0,18:2,18:2)  | TG | 19:0/18:2/18:2  | 55:4  | 896.7833 | C58 H104 O6 | 20.29  | +NH4 |
| * | TG(20:0,16:0,18:1)  | TG | 20:0/16:0/18:1  | 54:1  | 888.8146 | C57 H108 O6 | 21.177 | +NH4 |
| * | TG(20:0,18:1,18:2)  | TG | 20:0/18:1/18:2  | 56:3  | 912.8146 | C59 H108 O6 | 20.878 | +NH4 |
| * | TG(20:0,18:1,22:6)  | TG | 20:0/18:1/22:6  | 60:7  | 960.8146 | C63 H108 O6 | 20.569 | +NH4 |
| * | TG(20:0,18:2,18:2)  | TG | 20:0/18:2/18:2  | 56:4  | 910.7989 | C59 H106 O6 | 19.309 | +NH4 |
| * | TG(20:0,18:2,22:6)  | TG | 20:0/18:2/22:6  | 60:8  | 958.7989 | C63 H106 O6 | 20.245 | +NH4 |
| * | TG(20:0e,16:0,18:2) | TG | 20:0e/16:0/18:2 | 54:2e | 872.8197 | C57 H108 O5 | 21.517 | +NH4 |
| * | TG(20:0e,18:0,18:2) | TG | 20:0e/18:0/18:2 | 56:2e | 900.851  | C59 H112 O5 | 21.836 | +NH4 |
| * | TG(20:0e,18:1,18:2) | TG | 20:0e/18:1/18:2 | 56:3e | 898.8353 | C59 H110 O5 | 21.471 | +NH4 |
| * | TG(20:0e,18:2,18:2) | TG | 20:0e/18:2/18:2 | 56:4e | 896.8197 | C59 H108 O5 | 21.191 | +NH4 |
| * | TG(20:1,18:1,18:1)  | TG | 20:1/18:1/18:1  | 56:3  | 912.8146 | C59 H108 O6 | 20.746 | +NH4 |
| * | TG(20:1,18:2,22:4)  | TG | 20:1/18:2/22:4  | 60:7  | 960.8146 | C63 H108 O6 | 20.206 | +NH4 |
| X | TG(20:2,18:2,18:2)  | TG | 20:2/18:2/18:2  | 56:6  | 906.7676 | C59 H102 O6 | 19.652 | +NH4 |
| * | TG(20:3,22:6,22:6)  | TG | 20:3/22:6/22:6  | 64:15 | 1000.752 | C67 H100 O6 | 18.336 | +NH4 |
| * | TG(20:4,22:6,22:6)  | TG | 20:4/22:6/22:6  | 64:16 | 998.7363 | C67 H98 O6  | 18.072 | +NH4 |
| * | TG(20:5,18:2,18:2)  | TG | 20:5/18:2/18:2  | 56:9  | 900.7207 | C59 H96 O6  | 19.377 | +H   |
| X | TG(20:5,18:2,20:4)  | TG | 20:5/18:2/20:4  | 58:11 | 924.7207 | C61 H96 O6  | 18.921 | +H   |
| * | TG(20:5,18:2,20:5)  | TG | 20:5/18:2/20:5  | 58:12 | 922.705  | C61 H94 O6  | 18.489 | +H   |
| X | TG(20:5,18:2,22:6)  | TG | 20:5/18:2/22:6  | 60:13 | 948.7207 | C63 H96 O6  | 18.175 | +NH4 |
| * | TG(20:5,18:2,22:6)  | TG | 20:5/18:2/22:6  | 60:13 | 948.7207 | C63 H96 O6  | 18.724 | +H   |
| * | TG(20:5,20:4,22:6)  | TG | 20:5/20:4/22:6  | 62:15 | 972.7207 | C65 H96 O6  | 18.511 | +H   |
| X | TG(22:0,18:2,18:2)  | TG | 22:0/18:2/18:2  | 58:4  | 938.8302 | C61 H110 O6 | 20.958 | +NH4 |
| * | TG(22:0,18:2,20:4)  | TG | 22:0/18:2/20:4  | 60:6  | 962.8302 | C63 H110 O6 | 20.837 | +NH4 |
| * | TG(22:4,18:2,22:4)  | TG | 22:4/18:2/22:4  | 62:10 | 982.7989 | C65 H106 O6 | 19.718 | +NH4 |

|   |                    |    |                |       |           |             |        |      |
|---|--------------------|----|----------------|-------|-----------|-------------|--------|------|
| * | TG(22:4,18:2,22:6) | TG | 22:4/18:2/22:6 | 62:12 | 978.7676  | C65 H102 O6 | 18.961 | +NH4 |
| * | TG(22:5,18:2,18:2) | TG | 22:5/18:2/18:2 | 58:9  | 928.752   | C61 H100 O6 | 19.192 | +NH4 |
| * | TG(22:5,18:2,20:4) | TG | 22:5/18:2/20:4 | 60:11 | 952.752   | C63 H100 O6 | 18.76  | +NH4 |
| * | TG(22:5,18:2,22:6) | TG | 22:5/18:2/22:6 | 62:13 | 976.752   | C65 H100 O6 | 18.728 | +NH4 |
| * | TG(24:0,18:2,18:2) | TG | 24:0/18:2/18:2 | 60:4  | 966.8615  | C63 H114 O6 | 21.336 | +NH4 |
| * | TG(24:1,18:2,18:2) | TG | 24:1/18:2/18:2 | 60:5  | 964.8459  | C63 H112 O6 | 20.893 | +NH4 |
| * | TG(24:1,18:2,20:4) | TG | 24:1/18:2/20:4 | 62:7  | 988.8459  | C65 H112 O6 | 20.793 | +NH4 |
| X | TG(24:1,18:2,22:6) | TG | 24:1/18:2/22:6 | 64:9  | 1012.8459 | C67 H112 O6 | 20.608 | +NH4 |
| * | TG(25:0,16:0,16:0) | TG | 25:0/16:0/16:0 | 57:0  | 932.8772  | C60 H116 O6 | 22.009 | +NH4 |
| * | TG(25:0,18:1,18:2) | TG | 25:0/18:1/18:2 | 61:3  | 982.8928  | C64 H118 O6 | 21.76  | +NH4 |
| * | TG(25:0,18:2,18:2) | TG | 25:0/18:2/18:2 | 61:4  | 980.8772  | C64 H116 O6 | 21.518 | +NH4 |
| * | TG(8:0,12:0,12:0)  | TG | 8:0/12:0/12:0  | 32:0  | 582.4859  | C35 H66 O6  | 13.548 | +NH4 |
| * | TG(8:0,12:0,14:0)  | TG | 8:0/12:0/14:0  | 34:0  | 610.5172  | C37 H70 O6  | 15.097 | +NH4 |
| X | TG(8:0,18:1,18:2)  | TG | 8:0/18:1/18:2  | 44:3  | 744.6268  | C47 H84 O6  | 17.588 | +NH4 |
| X | TG(8:0,18:2,18:2)  | TG | 8:0/18:2/18:2  | 44:4  | 742.6111  | C47 H82 O6  | 16.851 | +NH4 |
| * | TG(8:0,18:2,18:3)  | TG | 8:0/18:2/18:3  | 44:5  | 740.5955  | C47 H80 O6  | 16.084 | +NH4 |
| * | TG(8:0,8:0,10:0)   | TG | 8:0/8:0/10:0   | 26:0  | 498.392   | C29 H54 O6  | 8.983  | +NH4 |
| * | TG(8:0,8:0,8:0)    | TG | 8:0/8:0/8:0    | 24:0  | 470.3607  | C27 H50 O6  | 7.596  | +NH4 |
| * | TG(9:0,18:2,18:2)  | TG | 9:0/18:2/18:2  | 45:4  | 756.6268  | C48 H84 O6  | 17.265 | +NH4 |

Cer: ceramide, CE: cholesterol ester, CL: cardiolipin, DG: diacylglycerol, LysoPC: lysophosphatidylcholine, LysoPE: lysophosphatidylethanolamine, LysoPG: lysophosphatidylglycerol, LysoPI: lysophosphatidylinositol, LysoPS: lysophosphatidylserine, PA: phosphatidic acid, PC: phosphatidylcholine, PE: phosphatidylethanolamine, PG: phosphatidylglycerol, PI: phosphatidylinositol, PS: phosphatidylserine, So: sphingosine, SM: sphingomyelin, TG: triacylglycerol. X: detected by both one-dimensional RPLC-MS/MS and two-dimensional mixed mode-RPLC/MS-MS. \*: detected only by two-dimensional mixed mode LC-RPLC/MS-MS.
